# Supplementary material
Source: Research Square preprint supplement (doi:10.21203/rs.3.rs-8881149/v1)
Supplement: Supplementary file 1 [file 23653f3db8eeb585ba587d43.xlsx]

## Sheet: Table S1
	Operon	Gene	uniprot	PF domain	Annotation	KEGG	Searching rules	Reference (PMID)
K+ Transporter genes	kdpFABC	kdpF	P36937	PF09604	Potassium-transporting ATPase KdpF subunit	K01545 potassium-transporting ATPase KdpF subunit	casset search: PF03814, (PF00122, PF00702), PF02669 optional PF09604	6146979/
		kdpA	P03959	PF03814	Potassium-transporting ATPase potassium-binding subunit	K01546 potassium-transporting ATPase potassium-binding subunit		6146979/
		kdpB	P03960	PF00122, PF00702	Potassium-transporting ATPase ATP-binding subunit	K01547 potassium-transporting ATPase ATP-binding subunit		6146979/
		kdpC	P03961	PF02669	Potassium-transporting ATPase KdpC subunit	K01548 potassium-transporting ATPase KdpC subunit		6146979
	kefCF	kefC	P03819	PF00999;PF02254;	Glutathione-regulated potassium-efflux system protein (export)	K11745 glutathione-regulated potassium-efflux system protein KefC	casset search: (PF00999, PF02254), PF02525	2046548/
		kefF	P0A754	PF02525	Glutathione-regulated potassium-efflux system ancillary protein	K11746 glutathione-regulated potassium-efflux system ancillary protein KefF		9278503/
	kefBG	kefB	P45522	PF00999;PF02254;	Glutathione-regulated potassium-efflux system protein (export)	K11747 glutathione-regulated potassium-efflux system protein KefB		9278503/
		kefG	P0A756	PF02525	Glutathione-regulated potassium-efflux system ancillary protein	K11748 glutathione-regulated potassium-efflux system ancillary protein KefG		24561554/
	kimA	kimA	P96589	PF13520	Potassium transporter	no KO assigned	Blast	28420751/
	kup (trkD)	kup (trkD)	P63183	PF02705, PF22776	Low affinity potassium transport system protein	K03549 kup KUP system potassium uptake protein	K03549	8226635/
Compatible solute accumulatio associated genes
Compatible solute transporter genes	proU	proX	P0AFM2	PF04069	PF00005, PF00571: ATP-binding protein; PF00528: Osmoprotectant permease protein; PF04069: Osmoprotectant binding protein	K02002 glycine betaine/proline transport system substrate-binding protein	casset search: PF00005, (PF00571, PF00528), PF04069,	2649479/
		proW	P14176	PF00528		K02001 glycine betaine/proline transport system permease protein		2649479/
		proV	P14175	PF00005, PF00571		K02000 glycine betaine/proline transport system ATP-binding protein		2649479/
	opuA	opuAA	P46920	PF00005, PF00571		K02000 glycine betaine/proline transport system ATP-binding protein		7622480/
		opuAB	P46921	PF00528		K02001 glycine betaine/proline transport system permease protein		7622480/
		opuAC	P46922	PF04069		K02002 glycine betaine/proline transport system substrate-binding protein		7622480/
	opuB	opuBA	Q45460	PF00005, PF00571		K05847 osmoprotectant transport system ATP-binding protein		10216873/
		opuBB	Q45461	PF00528		K05846 osmoprotectant transport system permease protein		10216873/
		opuBC	Q45462	PF04069		K05845 osmoprotectant transport system substrate-binding protein		10216873/
		opuBD	P39775	PF00528		K05846 osmoprotectant transport system permease protein		10216873/
	opuC	opuCA	G2JZ44	PF00005,PF00571		K05847 osmoprotectant transport system ATP-binding protein		12039715/
		opuCB	G2JZ43	PF00528		K05846 osmoprotectant transport system permease protein		12039715/
		opuCC	G2JZ42	PF04069		K05845 osmoprotectant transport system substrate-binding protein		12039715/
		opuCD	G2JZ41	PF00528		K05846 osmoprotectant transport system permease protein		12039715/
	osmU	osmY	Q8ZPK1	PF00528;		K05846 osmoprotectant transport system permease protein		22609924/
		osmX	Q8ZPK2	PF04069;		K05845 osmoprotectant transport system substrate-binding protein		22609924/
		osmW	Q8ZPK3	PF00528;		K05846 osmoprotectant transport system permease protein		22609924/
		osmV	Q8ZPK4	PF00005;PF00571;		K05847 osmoprotectant transport system ATP-binding protein		22609924/
	ousB	ousV	E0SCY1	PF00005, PF00571		K02000 glycine betaine/proline transport system ATP-binding protein		16000740/
		ousW	E0SCY2	PF00528		K02001 glycine betaine/proline transport system permease protein		16000740/
		ousX	E0SCY3	PF04069		K02002 glycine betaine/proline transport system substrate-binding protein		16000740/
	gbu	gbuA	Q9RR46	PF00005,PF00571		K02000 glycine betaine/proline transport system ATP-binding protein		10473414/
		gbuB	Q9RR45	PF00528		K02001 glycine betaine/proline transport system permease protein		10473414/
		gbuC	Q9RR44	PF04069		K02002 glycine betaine/proline transport system substrate-binding protein		10473414/
	opuF	opuFA	M5PEM0	PF00005	Quaternary amine transport ATP-binding protein	K05847 osmoprotectant transport system ATP-binding protein	casset search: PF00005, (PF00528, PF04069)	30097444
		opuFB	M5P8G6	PF00528,PF04069	Substrate-Binding Protein	K05845 osmoprotectant transport system substrate-binding protein K05846 osmoprotectant transport system permease protein		30097444/
	betT	betT	P0ABC9	PF02028		K02168 choline/glycine/proline betaine transport protein (betT, betS)	K03451 OR K02168 OR K05020	17322201/
	betL	betL	Q9X4A5	PF02028		K03451 betaine/carnitine transporter, BCCT family (TC.BCT)		10224004/
	betP	betP	P54582	PF02028		K02168 choline/glycine/proline betaine transport protein (betT, betS)		8752342/
	betS	betS	G3XCN6	PF02028		K05020 glycine betaine transporter (opuD, betL)		11976294/
	ectT	ectT	Q93AK1	PF02028		K05020 opuD, betL glycine betaine transporter		21764932/
	ectP	ectP	Q79VE0	PF02028	Ectoine/glycine betaine/proline transporter	No KO assigned		17390131/
	ectM	ectM	Q6VTH4	PF02028	Ectoine transporter	K05020 opuD, betL glycine betaine transporter		14872322/
	betM	betM	Q6VUB6	PF02028	Glycine betaine transporter	K05020 opuD, betL glycine betaine transporter		14872322/
	opuD	opuD	P54417	PF02028	Glycine betaine transporter	K05020 opuD, betL glycine betaine transporter		8752321/
	proP	proP	P0C0L7;Q4L3Q4	Gram-: PF08946,PF00083; Gram+: PF07690	Proline/betaine transporter	K03762 MFS transporter, MHS family, proline/betaine transporter (proP)	Gram-: K03762 AND (PF08946,PF00083); Gram+: K03762 AND PF07690	8421314/
	ousA	ousA	Q47421	PF08946, PF00083	Glycine betaine/proline/ectoine/pipecolic acid transporter	K03762 proP MFS transporter, MHS family, proline/betaine transporter	K03762 AND (PF08946, PF00083)	8550465/
	opuE	opuE	O06493	PF00474	Osmoregulated proline transporter	K03307 - TC.SSS; solute:Na+ symporter, SSS family; COG0591 - Na+/proline symporter	COG0591 AND PF00474 AND (K03307 OR K11928)	11902719/
	putP	putP	P07117	PF00474	Sodium/proline symporter	K11928 putP sodium/proline symporter; COG0591 - Na+/proline symporter		3302614/
Compatible solute biosynthetic genes	betAB	betA	P17444	PF05199,PF00732	Oxygen-dependent choline dehydrogenase	K00108 betA, CHDH choline dehydrogenase	casset search: (PF05199, PF00732), PF00171, optional PF02028.	3512525/
		betB	P17445	PF00171	Betaine aldehyde dehydrogenase	K00130 betB, gbsA betaine-aldehyde dehydrogenase		3512525/
	proABC	proA	P07004	PF00171	Gamma-glutamyl phosphate reductase	K00147 proA glutamate-5-semialdehyde dehydrogenase	casset search: PF00171, (PF00696, PF01472), (PF03807, PF14748)	6089111/
		proB	P0A7B5	PF00696, PF01472	Glutamate 5-kinase	K00931 proB glutamate 5-kinase		6089111/
		proC	P0A9L8	PF03807, PF14748	Pyrroline-5-carboxylate reductase	K00286 proC pyrroline-5-carboxylate reductase		6296787/
	otsBA	otsA	P9WN11	PF00982	Trehalose-6-phosphate synthase	K00697 otsA trehalose 6-phosphate synthase	casset search: PF02358, COG0380, PF00982	12473104/
		otsB	P9WFZ5	PF02358	Trehalose-phosphate phosphatase	K01087 otsB trehalose 6-phosphate phosphatase		15703182/
	ectABC	ectA	Q9AP35	PF00583	L-2,4-diaminobutyric acid acetyltransferase	K06718 ectA L-2,4-diaminobutyric acid acetyltransferase	casset search: PF00583, PF00202, PF06339,	11823218/
		ectB	Q9AP34	PF00202	Diaminobutyrate--2-oxoglutarate transaminase	K00836 ectB, dat diaminobutyrate-2-oxoglutarate transaminase		11823218/
		ectC	Q9AP33	PF06339	L-ectoine synthase	K06720 ectC L-ectoine synthase		11823218/
Transporter
Biosynthesis

## Sheet: Table S2
											kdpFABC						bcc ABC transporter				ectABC			kefBG		kefCF				betAB		proABC			otsBA		opuFAB
Genome Name / Sample Name	IMG Genome ID	NCBI Family	NCBI Class	NCBI Order	NCBI Taxon ID	NCBI Phylum	NCBI Genus	NCBI Species	Gram Staining	Salinity	Potassium-transporting ATPase potassium-binding subunit kdpA subunit	Potassium-transporting ATPase ATP-binding subunit kdpB subunit	Potassium-transporting ATPase KdpC subunit	Potassium-transporting ATPase KdpF subunit	kimA	kup (trkD)	ATP-binding protein	Osmoprotectant import permease protein	Osmoprotectant-binding protein	bcct	L-2,4-diaminobutyric acid acetyltransferase, ectA	Diaminobutyrate--2-oxoglutarate transaminase, etcB	L-ectoine synthase, etcC	kefB	kefG	kefC	kefF	proP/ousA	opuE/putP	Oxygen-dependent choline dehydrogenase, betA	Betaine aldehyde dehydrogenase, betB	Gamma-glutamyl phosphate reductase, proA	Glutamate 5-kinase, proB	Pyrroline-5-carboxylate reductase, proC	Trehalose-6-phosphate synthase, otsA	Trehalose-phosphate phosphatase, otsB	Quaternary amine transport ATP-binding protein, opuFA	Osmoprotectant update ABC transporter permease/substrate-binding subunit, opuFB
Saccharomyces cerevisiae S288C	638208609	Saccharomycetaceae	Saccharomycetes	Saccharomycetales	4932	Ascomycota	Saccharomyces	Saccharomyces cerevisiae
Collinsella aerofaciens ATCC 25986	640612206	Coriobacteriaceae	Coriobacteriia	Coriobacteriales	411903	Actinomycetota	Collinsella	Collinsella aerofaciens	Gram+							640613928| 640612772
Pseudoflavonifractor capillosus ATCC 29799	640963014	Oscillospiraceae	Clostridia	Eubacteriales	411467	Bacillota	Pseudoflavonifractor	Pseudoflavonifractor capillosus	Gram+
Bifidobacterium adolescentis L2-32	640963015	Bifidobacteriaceae	Actinomycetes	Bifidobacteriales	411481	Actinomycetota	Bifidobacterium	Bifidobacterium adolescentis	Gram+							641041912													641039657
Parabacteroides merdae ATCC 43184	640963016	Tannerellaceae	Bacteroidia	Bacteroidales	411477	Bacteroidota	Parabacteroides	Parabacteroides merdae	Gram-		641046314	641046315	641046316				641042870	641042871	641042872
Eubacterium ventriosum ATCC 27560	640963022	Eubacteriaceae	Clostridia	Eubacteriales	411463	Bacillota	Eubacterium	Eubacterium ventriosum	Gram+											641000108									640999710
Bacteroides caccae ATCC 43185	640963023	Bacteroidaceae	Bacteroidia	Bacteroidales	411901	Bacteroidota	Bacteroides	Bacteroides caccae	Gram-
Blautia obeum ATCC 29174	640963024	Lachnospiraceae	Clostridia	Lachnospirales	411459	Bacillota	Blautia	Blautia obeum	Gram+
Ruminococcus torques ATCC 27756	640963025	Lachnospiraceae	Clostridia	Lachnospirales	411460	Bacillota	Mediterraneibacter	[Ruminococcus] torques	Gram+
Dorea longicatena DSM 13814	640963046	Lachnospiraceae	Clostridia	Lachnospirales	411462	Bacillota	Dorea	Dorea longicatena	Gram+
Ruminococcus gnavus ATCC 29149	640963057	Lachnospiraceae	Clostridia	Lachnospirales	411470	Bacillota	Mediterraneibacter	Mediterraneibacter gnavus	Gram+		641053333	641053334	641053335
Schaalia odontolytica ATCC 17982	640963058	Actinomycetaceae	Actinomycetes	Actinomycetales	411466	Actinomycetota	Schaalia	Schaalia dentiphila	Gram+						641056778
Faecalibacterium prausnitzii M21/2	641380420	Oscillospiraceae	Clostridia	Eubacteriales	411485	Bacillota	Faecalibacterium	Faecalibacterium prausnitzii	Gram+
Parvimonas micra ATCC 33270	641380421	Peptoniphilaceae	Tissierellia	Tissierellales	411465	Bacillota	Parvimonas	Parvimonas micra	Gram+											641412019
Coprococcus eutactus ATCC 27759	641380422	Lachnospiraceae	Clostridia	Lachnospirales	411474	Bacillota	Coprococcus	Coprococcus eutactus	Gram+																				641414571
Clostridium leptum DSM 753	641380427	Oscillospiraceae	Clostridia	Eubacteriales	428125	Bacillota	unclassified	[Clostridium] leptum	Gram+		641398161	641398162	641398163
Enterocloster bolteae ATCC BAA-613	641380428	Lachnospiraceae	Clostridia	Lachnospirales	411902	Bacillota	Enterocloster	Enterocloster bolteae	Gram+		641400188	641400187	641400186							641402636| 641401987| 641400222
Amedibacillus dolichus DSM 3991	641380446	Erysipelotrichaceae	Erysipelotrichia	Erysipelotrichales	428127	Bacillota	Amedibacillus	Amedibacillus dolichus	Gram+
Bacteroides uniformis ATCC 8492	641380447	Bacteroidaceae	Bacteroidia	Bacteroidales	411479	Bacteroidota	Bacteroides	Bacteroides uniformis	Gram-		641386163	641386164	641386165
Clostridium sp. L2-50	641380448	Clostridiaceae	Clostridia	Eubacteriales	411489	Bacillota	Clostridium	Clostridium sp. L2-50	Gram+
Bacteroides ovatus ATCC 8483	641380449	Bacteroidaceae	Bacteroidia	Bacteroidales	411476	Bacteroidota	Bacteroides	Bacteroides ovatus	Gram-
Finegoldia magna ATCC 29328	641522627	Peptoniphilaceae	Tissierellia	Tissierellales	334413	Bacillota	Finegoldia	Finegoldia magna	Gram+											641570195
Limosilactobacillus fermentum IFO 3956	641522633	Lactobacillaceae	Bacilli	Lactobacillales	334390	Bacillota	Limosilactobacillus	Limosilactobacillus fermentum	Gram+						641713714	641714533
Intestinibacter bartlettii DSM 16795	641736113	Peptostreptococcaceae	Clostridia	Peptostreptococcales	445973	Bacillota	Intestinibacter	Intestinibacter bartlettii	Gram+											642162568
Dorea formicigenerans ATCC 27755	641736133	Lachnospiraceae	Clostridia	Lachnospirales	411461	Bacillota	Dorea	Dorea formicigenerans	Gram+											641807807| 641806877
Thomasclavelia spiroformis DSM 1552	641736169	Coprobacillaceae	Erysipelotrichia	Erysipelotrichales	428126	Bacillota	Thomasclavelia	Thomasclavelia spiroformis	Gram+
Streptococcus infantarius infantarius ATCC BAA-102	641736171	Streptococcaceae	Bacilli	Lactobacillales	471872	Bacillota	Streptococcus	Streptococcus infantarius	Gram+						642347583
Providencia stuartii ATCC 25827	641736172	Morganellaceae	Gammaproteobacteria	Enterobacterales	471874	Pseudomonadota	Providencia	Providencia stuartii	Gram-											642342943| 642345515| 642345248								642341209| 642343694
Eubacterium siraeum DSM 15702	641736184	Oscillospiraceae	Clostridia	Eubacteriales	428128	Bacillota	unclassified	[Eubacterium] siraeum	Gram+		642025284	642025285	642025286
Bifidobacterium dentium ATCC 27678	641736189	Bifidobacteriaceae	Actinomycetes	Bifidobacteriales	473819	Actinomycetota	Bifidobacterium	Bifidobacterium dentium	Gram+							642327544
Anaerofustis stercorihominis DSM 17244	641736193	Eubacteriaceae	Clostridia	Eubacteriales	445971	Bacillota	Anaerofustis	Anaerofustis stercorihominis	Gram+
Bacteroides stercoris ATCC 43183	641736196	Bacteroidaceae	Bacteroidia	Bacteroidales	449673	Bacteroidota	Bacteroides	Bacteroides stercoris	Gram-
Lachnoclostridium scindens ATCC 35704	641736197	Lachnospiraceae	Clostridia	Lachnospirales	411468	Bacillota	Lachnoclostridium	[Clostridium] scindens	Gram+		642193551	642193552	642193553							642194976
Thomasclavelia ramosa DSM 1402	641736198	Coprobacillaceae	Erysipelotrichia	Erysipelotrichales	445974	Bacillota	Thomasclavelia	Thomasclavelia ramosa	Gram+
Alistipes putredinis DSM 17216	641736205	Rikenellaceae	Bacteroidia	Bacteroidales	445970	Bacteroidota	Alistipes	Alistipes putredinis	Gram-
Anaerostipes caccae L1-92	641736227	Lachnospiraceae	Clostridia	Lachnospirales	411490	Bacillota	Anaerostipes	Anaerostipes caccae	Gram+		641894752	641894751	641894750																								641897014	641897015
Clostridium sp. SS2/1	641736270	Clostridiaceae	Clostridia	Eubacteriales	411484	Bacillota	Clostridium	Clostridium sp. SS2/1	Gram+																				642200537
Anaerotruncus colihominis DSM 17241	641736271	Oscillospiraceae	Clostridia	Eubacteriales	445972	Bacillota	Anaerotruncus	Anaerotruncus colihominis	Gram+
Limosilactobacillus reuteri JCM 1112	642555135	Lactobacillaceae	Bacilli	Lactobacillales	557433	Bacillota	Limosilactobacillus	Limosilactobacillus reuteri	Gram+						642584065
Porphyromonas gingivalis ATCC 33277	642555148	Porphyromonadaceae	Bacteroidia	Bacteroidales	431947	Bacteroidota	Porphyromonas	Porphyromonas gingivalis	Gram-
Mediterraneibacter lactaris ATCC 29176	642791604	Lachnospiraceae	Clostridia	Lachnospirales	471875	Bacillota	Mediterraneibacter	[Ruminococcus] lactaris	Gram+
Phocaeicola coprocola DSM 17136	642791613	Bacteroidaceae	Bacteroidia	Bacteroidales	470145	Bacteroidota	Phocaeicola	Phocaeicola coprocola	Gram-		642793271	642793272	642793273
Clostridium sporogenes ATCC 15579	642791615	Clostridiaceae	Clostridia	Eubacteriales	471871	Bacillota	Clostridium	Clostridium sporogenes	Gram+		642847834	642847835	642847836							642851445
Bacteroides intestinalis 341, DSM 17393	642791621	Bacteroidaceae	Bacteroidia	Bacteroidales	471870	Bacteroidota	Bacteroides	Bacteroides intestinalis	Gram-
Capnocytophaga sputigena Capno, ATCC 33612	642979305	Flavobacteriaceae	Flavobacteriia	Flavobacteriales	553177	Bacteroidota	Capnocytophaga	Capnocytophaga sputigena	Gram-
Corynebacterium amycolatum SK46	642979306	Corynebacteriaceae	Actinomycetes	Mycobacteriales	553204	Actinomycetota	Corynebacterium	Corynebacterium amycolatum	Gram+		643192986	643192985	643192984	643192987						643192406| 643193870| 643193723| 643192999									643192299	643193000	643192998
Bifidobacterium catenulatum DSM 16992, JCM 1194, LMG 11043	642979312	Bifidobacteriaceae	Actinomycetes	Bifidobacteriales	566552	Actinomycetota	Bifidobacterium	Bifidobacterium catenulatum	Gram+							643150836													643150645
Desulfovibrio piger ATCC 29098	642979316	Desulfovibrionaceae	Desulfovibrionia	Desulfovibrionales	411464	Thermodesulfobacteriota	Desulfovibrio	Desulfovibrio piger	Gram-
Providencia alcalifaciens sv. 019:H2 DSM 30120	642979317	Morganellaceae	Gammaproteobacteria	Enterobacterales	520999	Pseudomonadota	Providencia	Providencia alcalifaciens	Gram-											643144665| 643144900								643147058| 643146291| 643146380
Providencia rustigianii DSM 4541	642979318	Morganellaceae	Gammaproteobacteria	Enterobacterales	500637	Pseudomonadota	Providencia	Providencia rustigianii	Gram-		643143277	643143276	643143275							643143730| 643140775				643141912	643141911			643142940| 643141765		643143733	643143732
Collinsella stercoris DSM 13279	642979321	Coriobacteriaceae	Coriobacteriia	Coriobacteriales	445975	Actinomycetota	Collinsella	Collinsella stercoris	Gram+							643136950
Anaerococcus hydrogenalis DSM 7454	642979323	Peptoniphilaceae	Tissierellia	Tissierellales	561177	Bacillota	Anaerococcus	Anaerococcus hydrogenalis	Gram+
Bacteroides eggerthii DSM 20697	642979334	Bacteroidaceae	Bacteroidia	Bacteroidales	483216	Bacteroidota	Bacteroides	Bacteroides eggerthii	Gram-
Bacteroides pectinophilus ATCC 43243	642979337	unclassified	Clostridia	Eubacteriales	483218	Bacillota	unclassified	[Bacteroides] pectinophilus	Gram+
Bacteroides plebeius M12, DSM 17135	642979351	Bacteroidaceae	Bacteroidia	Bacteroidales	484018	Bacteroidota	Phocaeicola	Phocaeicola plebeius	Gram-
Parabacteroides johnsonii DSM 18315	642979358	Tannerellaceae	Bacteroidia	Bacteroidales	537006	Bacteroidota	Parabacteroides	Parabacteroides johnsonii	Gram-		643156283	643156282	643156281				643156294	643156293	643156292
Lachnoclostridium hylemonae DSM 15053	642979359	Lachnospiraceae	Clostridia	Lachnospirales	553973	Bacillota	Lachnoclostridium	[Clostridium] hylemonae	Gram+		643159699	643159700	643159701							643160610| 643162445																	643160391	643160392
Holdemanella biformis DSM 3989	642979360	Erysipelotrichaceae	Erysipelotrichia	Erysipelotrichales	518637	Bacillota	Holdemanella	Holdemanella biformis	Gram+											643182861
Tyzzerella nexilis DSM 1787	642979369	Lachnospiraceae	Clostridia	Lachnospirales	500632	Bacillota	Tyzzerella	[Clostridium] nexile	Gram+
Phocaeicola dorei DSM 17855	642979370	Bacteroidaceae	Bacteroidia	Bacteroidales	483217	Bacteroidota	Phocaeicola	Phocaeicola dorei	Gram-		643121823	643121824	643121825
Peptacetobacter hiranonis DSM 13275	642979371	Peptostreptococcaceae	Clostridia	Peptostreptococcales	500633	Bacillota	Peptacetobacter	Peptacetobacter hiranonis	Gram+		643118280	643118281|643118277	643118282
Escherichia coli SE11	643348551	Enterobacteriaceae	Gammaproteobacteria	Enterobacterales	409438	Pseudomonadota	Escherichia	Escherichia coli	Gram-							643410050				643407947| 643406285| 643405983								643410450
Corynebacterium lipophiloflavum DSM 44291	643886002	Corynebacteriaceae	Actinomycetes	Mycobacteriales	525263	Actinomycetota	Corynebacterium	Corynebacterium lipophiloflavum	Gram+											644349178| 644348045															644347728	644347726
Enterococcus faecalis ATCC 29200	643886004	Enterococcaceae	Bacilli	Lactobacillales	525271	Bacillota	Enterococcus	Enterococcus faecalis	Gram+						644350927	644350938	644350932	644350929|644350931	644350930																		644350748	644350749
Roseburia inulinivorans DSM 16841	643886006	Lachnospiraceae	Clostridia	Lachnospirales	622312	Bacillota	Roseburia	Roseburia inulinivorans	Gram+
Clostridiales bacterium 1_7_47FAA	643886007	unclassified	Clostridia	Eubacteriales	457421	Bacillota	unclassified	Clostridiales bacterium 1_7_47FAA	Gram+		643915960	643915959	643915958							643914355| 643915782| 643914352| 643917330									643918273
Campylobacter rectus RM3267, CCUG 20446	643886009	Campylobacteraceae	Epsilonproteobacteria	Campylobacterales	553218	Campylobacterota	Campylobacter	Campylobacter rectus	Gram-											644263781| 644261700
Staphylococcus capitis SK14	643886010	Staphylococcaceae	Bacilli	Bacillales	553212	Bacillota	Staphylococcus	Staphylococcus capitis	Gram+						644258240		644258228	644258229|644258231	644258230	644258463| 644258933								644258823		644258074	644258073						644258676	644258675
Lactobacillus acidophilus ATCC 4796	643886014	Lactobacillaceae	Bacilli	Lactobacillales	525306	Bacillota	Lactobacillus	Lactobacillus acidophilus	Gram+							644358655| 644358230
Actinomyces urogenitalis DSM 15434	643886015	Actinomycetaceae	Actinomycetes	Actinomycetales	525246	Actinomycetota	Actinomyces	Actinomyces urogenitalis	Gram+						644255119													644257200| 644256125| 644256124
Gleimia coleocanis DSM 15436	643886017	Actinomycetaceae	Actinomycetes	Actinomycetales	525245	Actinomycetota	Gleimia	Gleimia coleocanis	Gram+											644254197| 644254145									644254728
Lancefieldella rimae ATCC 49626	643886019	Atopobiaceae	Coriobacteriia	Coriobacteriales	553184	Actinomycetota	Lancefieldella	Lancefieldella rimae	Gram+							644252076																					644252569	644252570
Streptococcus salivarius SK126	643886022	Streptococcaceae	Bacilli	Lactobacillales	596322	Bacillota	Streptococcus	Streptococcus salivarius	Gram+						644445791					644446467																	644446232|644446225	644446231
Proteus mirabilis ATCC 29906	643886024	Morganellaceae	Gammaproteobacteria	Enterobacterales	525369	Pseudomonadota	Proteus	Proteus mirabilis	Gram-		644442034	644442033	644442032				644327288	644445068	644445069	644442282| 644444500| 644444089				644441713	644441712			644441249| 644442460		644442279	644442280
Staphylococcus hominis SK119	643886039	Staphylococcaceae	Bacilli	Bacillales	629742	Bacillota	Staphylococcus	Staphylococcus hominis	Gram+						644447589					644448491| 644447833| 644448600| 644449194| 644447208									644448734
Bifidobacterium bifidum NCIMB 41171	643886040	Bifidobacteriaceae	Actinomycetes	Bifidobacteriales	398513	Actinomycetota	Bifidobacterium	Bifidobacterium bifidum	Gram+							643910791
Lentilactobacillus hilgardii ATCC 8290	643886044	Lactobacillaceae	Bacilli	Lactobacillales	1423757	Bacillota	Lentilactobacillus	Lentilactobacillus hilgardii	Gram+						644307167
Lactobacillus johnsonii ATCC 33200	643886046	Lactobacillaceae	Bacilli	Lactobacillales	525330	Bacillota	Lactobacillus	Lactobacillus johnsonii	Gram+							644311663| 644311662
Lactobacillus ultunensis DSM 16047	643886047	Lactobacillaceae	Bacilli	Lactobacillales	525365	Bacillota	Lactobacillus	Lactobacillus ultunensis	Gram+							644319349
Ligilactobacillus salivarius HO66, ATCC 11741	643886048	Lactobacillaceae	Bacilli	Lactobacillales	1423799	Bacillota	Ligilactobacillus	Ligilactobacillus salivarius	Gram+						644316246	644317418
Limosilactobacillus vaginalis ATCC 49540	643886050	Lactobacillaceae	Bacilli	Lactobacillales	1423814	Bacillota	Limosilactobacillus	Limosilactobacillus vaginalis	Gram+						644320593					644321394
Lacticaseibacillus paracasei subsp. paracasei ATCC 25302	643886051	Lactobacillaceae	Bacilli	Lactobacillales	525337	Bacillota	Lacticaseibacillus	Lacticaseibacillus paracasei	Gram+						644327199	644327098	644327288|644326898	644327289|644326899|644326901	644327290|644326900																		644326403	644326402
Anaerococcus tetradius ATCC 35098	643886055	Peptoniphilaceae	Tissierellia	Tissierellales	525255	Bacillota	Anaerococcus	Anaerococcus tetradius	Gram+
Acidaminococcus intestini D21	643886056	Acidaminococcaceae	Negativicutes	Acidaminococcales	187327	Bacillota	Acidaminococcus	Acidaminococcus intestini	Gram+											644274696| 644273068
Corynebacterium striatum ATCC 6940	643886057	Corynebacteriaceae	Actinomycetes	Mycobacteriales	525268	Actinomycetota	Corynebacterium	Corynebacterium striatum	Gram+											644280002| 644280338| 644281939										644281938	644281940				644282210	644282208
Corynebacterium accolens ATCC 49725	643886058	Corynebacteriaceae	Actinomycetes	Mycobacteriales	525260	Actinomycetota	Corynebacterium	Corynebacterium accolens	Gram+											644278506| 644277364| 644277254| 644278103								644278657		644278104	644278102				644277871	644277869
Lentilactobacillus hilgardii ATCC 27305	643886059	Lactobacillaceae	Bacilli	Lactobacillales	525310	Bacillota	Lentilactobacillus	Lentilactobacillus hilgardii	Gram+						644286641	644285068	644285929	644285930	644285931																		644284899	644284900
Limosilactobacillus fermentum ATCC 14931	643886061	Lactobacillaceae	Bacilli	Lactobacillales	525325	Bacillota	Limosilactobacillus	Limosilactobacillus fermentum	Gram+						644290416	644290992
Lentilactobacillus buchneri ATCC 11577	643886062	Lactobacillaceae	Bacilli	Lactobacillales	525318	Bacillota	Lentilactobacillus	Lentilactobacillus buchneri	Gram+						644289720		644296304	644288925	644288926																		644287877	644287878
Enterococcus faecalis TX1322	643886064	Enterococcaceae	Bacilli	Lactobacillales	525278	Bacillota	Enterococcus	Enterococcus faecalis	Gram+						644298425	644298438
Enterococcus faecalis TX0104	643886065	Enterococcaceae	Bacilli	Lactobacillales	491074	Bacillota	Enterococcus	Enterococcus faecalis	Gram+		644293679	644293680	644293681		644296299	644296310	644296304	644296303|644296301	644296302																		644293794	644293795
Escherichia coli 83972	643886067	Enterobacteriaceae	Gammaproteobacteria	Enterobacterales	525281	Pseudomonadota	Escherichia	Escherichia coli	Gram-		644300470	644300471	644300472	644300469		644300105	644304406|644303361	644304407|644303362|644303360	644304408|644303363	644300818| 644301215				644299619	644299620	644301208	644301209	644303029	644300166	644300821	644300820				644301848	644301847
Shuttleworthia satelles DSM 14600	643886070	Lachnospiraceae	Clostridia	Lachnospirales	626523	Bacillota	Shuttleworthella	Shuttleworthella satelles	Gram+																				644368802
Enterococcus faecalis HH22	643886073	Enterococcaceae	Bacilli	Lactobacillales	491075	Bacillota	Enterococcus	Enterococcus faecalis	Gram+		644389184	644389183	644389182		644389500	644389511	644389505	644389504|644389502	644389503																		644389315	644389316
Veillonella dispar ATCC 17748	643886074	Veillonellaceae	Negativicutes	Veillonellales	546273	Bacillota	Veillonella	Veillonella dispar	Gram-																				644360346
Bifidobacterium breve DSM 20213, JCM 1192	643886102	Bifidobacteriaceae	Actinomycetes	Bifidobacteriales	518634	Actinomycetota	Bifidobacterium	Bifidobacterium breve	Gram+							644162578												644163076
Holdemania filiformis VPI J1-31B-1, DSM 12042	643886103	Erysipelotrichaceae	Erysipelotrichia	Erysipelotrichales	545696	Bacillota	Holdemania	Holdemania filiformis	Gram+		644159302	644159301	644159300				644162091	644162090|644162089	644162088	644159986
Oribacterium sinus F0268	643886104	Lachnospiraceae	Clostridia	Lachnospirales	585501	Bacillota	Oribacterium	Oribacterium sinus	Gram+											644434441
Mobiluncus mulieris ATCC 35243	643886108	Actinomycetaceae	Actinomycetes	Actinomycetales	585199	Actinomycetota	Mobiluncus	Mobiluncus mulieris	Gram+
Leuconostoc mesenteroides cremoris ATCC 19254	643886109	Lactobacillaceae	Bacilli	Lactobacillales	586220	Bacillota	Leuconostoc	Leuconostoc mesenteroides	Gram+						644428027																						644428408	644428407
Catenibacterium mitsuokai DSM 15897	643886110	Coprobacillaceae	Erysipelotrichia	Erysipelotrichales	451640	Bacillota	Catenibacterium	Catenibacterium mitsuokai	Gram+
Bacteroides cellulosilyticus DSM 14838	643886111	Bacteroidaceae	Bacteroidia	Bacteroidales	537012	Bacteroidota	Bacteroides	Bacteroides cellulosilyticus	Gram-		644166808	644166807	644166806
Enterocloster asparagiformis DSM 15981	643886112	Lachnospiraceae	Clostridia	Lachnospirales	518636	Bacillota	Enterocloster	Enterocloster asparagiformis	Gram+		644181640	644181638	644181637	644181639						644180946| 644180336| 644176836
Capnocytophaga gingivalis ATCC 33624	643886113	Flavobacteriaceae	Flavobacteriia	Flavobacteriales	553178	Bacteroidota	Capnocytophaga	Capnocytophaga gingivalis	Gram-																												644451206	644451207
Coprococcus comes ATCC 27758	643886116	Lachnospiraceae	Clostridia	Lachnospirales	470146	Bacillota	Coprococcus	Coprococcus comes	Gram+
Proteus penneri ATCC 35198	643886117	Morganellaceae	Gammaproteobacteria	Enterobacterales	471881	Pseudomonadota	Proteus	Proteus penneri	Gram-											644098080| 644098951| 644096512								644095929
Enterococcus faecium TX1330	643886120	Enterococcaceae	Bacilli	Lactobacillales	525279	Bacillota	Enterococcus	Enterococcus faecium	Gram+						644353747	644353723
Lacticaseibacillus rhamnosus LMS2-1	643886127	Lactobacillaceae	Bacilli	Lactobacillales	525361	Bacillota	Lacticaseibacillus	Lacticaseibacillus rhamnosus	Gram+						644392873	644392756
Sphingobacterium spiritivorum ATCC 33300	643886135	Sphingobacteriaceae	Sphingobacteriia	Sphingobacteriales	525372	Bacteroidota	Sphingobacterium	Sphingobacterium spiritivorum	Gram-		644337362	644337361	644337360			644332926				644336533				644335014	644335013
Corynebacterium glucuronolyticum ATCC 51866	643886137	Corynebacteriaceae	Actinomycetes	Mycobacteriales	548478	Actinomycetota	Corynebacterium	Corynebacterium glucuronolyticum	Gram+							644340396				644342094| 644342645| 644340864
Lacticaseibacillus paracasei 8700:2	643886139	Lactobacillaceae	Bacilli	Lactobacillales	537973	Bacillota	Lacticaseibacillus	Lacticaseibacillus paracasei	Gram+						643928130	643928234	643928042|643927588	643928041|643927585|643927587	643928040|643927586																		643928479	643928478
Bifidobacterium longum longum ATCC 55813	643886140	Bifidobacteriaceae	Actinomycetes	Bifidobacteriales	548480	Actinomycetota	Bifidobacterium	Bifidobacterium longum	Gram+							644346701| 644347168												644346501
Helicobacter cinaedi CCUG 18818	643886141	Helicobacteraceae	Epsilonproteobacteria	Campylobacterales	537971	Campylobacterota	Helicobacter	Helicobacter cinaedi	Gram-
Porphyromonas uenonis 60-3	643886142	Porphyromonadaceae	Bacteroidia	Bacteroidales	596327	Bacteroidota	Porphyromonas	Porphyromonas uenonis	Gram-
Methanobrevibacter smithii DSM 2375	643886144	Methanobacteriaceae	Methanobacteria	Methanobacteriales	483214	Methanobacteriota	Methanobrevibacter	Methanobrevibacter smithii	Gram+
Anaerococcus lactolyticus ATCC 51172	643886145	Peptoniphilaceae	Tissierellia	Tissierellales	525254	Bacillota	Anaerococcus	Anaerococcus lactolyticus	Gram+
Corynebacterium glucuronolyticum ATCC 51867	643886147	Corynebacteriaceae	Actinomycetes	Mycobacteriales	548477	Actinomycetota	Corynebacterium	Corynebacterium glucuronolyticum	Gram+							644133941				644132508| 644133093| 644132213															644134154	644134152
Porphyromonas endodontalis ATCC 35406	643886148	Porphyromonadaceae	Bacteroidia	Bacteroidales	553175	Bacteroidota	Porphyromonas	Porphyromonas endodontalis	Gram-
Catonella morbi ATCC 51271	643886188	Lachnospiraceae	Clostridia	Lachnospirales	592026	Bacillota	Catonella	Catonella morbi	Gram+																												644363082	644363083
Kingella oralis UB-38, ATCC 51147	643886193	Neisseriaceae	Betaproteobacteria	Neisseriales	629741	Pseudomonadota	Kingella	Kingella oralis	Gram-
Phocaeicola coprophilus CB42	643886197	Bacteroidaceae	Bacteroidia	Bacteroidales	547042	Bacteroidota	Phocaeicola	Phocaeicola coprophilus	Gram-
Neisseria flavescens NRL30031/H210	643886198	Neisseriaceae	Betaproteobacteria	Neisseriales	546264	Pseudomonadota	Neisseria	Neisseria flavescens	Gram-											644222491
Blautia hydrogenotrophica DSM 10507	643886199	Lachnospiraceae	Clostridia	Lachnospirales	476272	Bacillota	Blautia	Blautia hydrogenotrophica	Gram+											644157763| 644154578
Rhodococcus erythropolis SK121	643886201	Nocardiaceae	Actinomycetes	Mycobacteriales	596309	Actinomycetota	Rhodococcus	Rhodococcus erythropolis	Gram+		644728245	644728246	644728247	644728244	644724223| 644726313					644729908| 644724796	644728188	644728187	644728186					644728192| 644729262| 644723834| 644725163
Anaerobutyricum hallii DSM 3353	643886203	Lachnospiraceae	Clostridia	Lachnospirales	411469	Bacillota	Anaerobutyricum	Anaerobutyricum hallii	Gram+
Clostridium methylpentosum R2, DSM 5476	643886206	Oscillospiraceae	Clostridia	Eubacteriales	537013	Bacillota	unclassified	[Clostridium] methylpentosum	Gram+		644209686	644209685	644209684																644207984								644208501	644208502
Corynebacterium matruchotii ATCC 33806	643886207	Corynebacteriaceae	Actinomycetes	Mycobacteriales	566549	Actinomycetota	Corynebacterium	Corynebacterium matruchotii	Gram+											644205939									644205741						644205037	644205035
Eikenella corrodens ATCC 23834	643886208	Neisseriaceae	Betaproteobacteria	Neisseriales	546274	Pseudomonadota	Eikenella	Eikenella corrodens	Gram-
Lactobacillus crispatus JV-V01	643886212	Lactobacillaceae	Bacilli	Lactobacillales	491076	Bacillota	Lactobacillus	Lactobacillus crispatus	Gram+							644426556| 644425808
Helicobacter canadensis MIT 98-5491, ATCC 700968	643886213	Helicobacteraceae	Epsilonproteobacteria	Campylobacterales	537970	Campylobacterota	Helicobacter	Helicobacter canadensis	Gram-																			643920910
Acinetobacter sp. ATCC 27244	643886214	Moraxellaceae	Gammaproteobacteria	Moraxellales	525244	Pseudomonadota	Acinetobacter	Acinetobacter sp. ATCC 27244	Gram-							644128404				644126868
Methanobrevibacter smithii F1, DSM 2374	643886215	Methanobacteriaceae	Methanobacteria	Methanobacteriales	521002	Methanobacteriota	Methanobrevibacter	Methanobrevibacter smithii	Gram+																												644140998	644140997
Bifidobacterium longum longum CCUG 52486	643886216	Bifidobacteriaceae	Actinomycetes	Bifidobacteriales	537937	Actinomycetota	Bifidobacterium	Bifidobacterium longum	Gram+							643911885| 643913096												643913389
Helicobacter pullorum MIT 98-5489	643886218	Helicobacteraceae	Epsilonproteobacteria	Campylobacterales	537972	Campylobacterota	Helicobacter	Helicobacter pullorum	Gram-																			643924847
Propionibacterium acidifaciens F0233	645058700	Propionibacteriaceae	Actinomycetes	Propionibacteriales	553198	Actinomycetota	Propionibacterium	Propionibacterium acidifaciens	Gram+
Eubacterium saphenum ATCC 49989	645058705	Anaerovoracaceae	Clostridia	Peptostreptococcales	592031	Bacillota	unclassified	[Eubacterium] saphenum	Gram+																				645511151
Lactobacillus gasseri 202-4	645058712	Lactobacillaceae	Bacilli	Lactobacillales	630527	Bacillota	Lactobacillus	Lactobacillus gasseri	Gram+							645520508| 645520507
Corynebacterium tuberculostearicum SK141	645058719	Corynebacteriaceae	Actinomycetes	Mycobacteriales	553206	Actinomycetota	Corynebacterium	Corynebacterium tuberculostearicum	Gram+											645630580| 645631613| 645631952								645630000
Campylobacter showae RM3277	645058720	Campylobacteraceae	Epsilonproteobacteria	Campylobacterales	553219	Campylobacterota	Campylobacter	Campylobacter showae	Gram-											645632395
Lactobacillus jensenii 269-3	645058722	Lactobacillaceae	Bacilli	Lactobacillales	596325	Bacillota	Lactobacillus	Lactobacillus jensenii	Gram+							645518773
Selenomonas flueggei ATCC 43531	645058738	Selenomonadaceae	Negativicutes	Selenomonadales	638302	Bacillota	Selenomonas	Selenomonas flueggei	Gram+
Neisseria sicca ATCC 29256	645058748	Neisseriaceae	Betaproteobacteria	Neisseriales	547045	Pseudomonadota	Neisseria	Neisseria sicca	Gram-											645477250
Acinetobacter radioresistens SK82	645058758	Moraxellaceae	Gammaproteobacteria	Moraxellales	596318	Pseudomonadota	Acinetobacter	Acinetobacter radioresistens	Gram-							645636732				645636769| 645636629								645636615	645635547
Anaerococcus vaginalis ATCC 51170	645058761	Peptoniphilaceae	Tissierellia	Tissierellales	655811	Bacillota	Anaerococcus	Anaerococcus vaginalis	Gram+
Parabacteroides sp. 2_1_7	645058782	Tannerellaceae	Bacteroidia	Bacteroidales	457388	Bacteroidota	Parabacteroides	Parabacteroides sp. 2_1_7	Gram-		645278799	645278800	645278801				645283062|645282138	645283061|645282137	645282136|645283060
Neisseria flavescens SK114	645058784	Neisseriaceae	Betaproteobacteria	Neisseriales	596320	Pseudomonadota	Neisseria	Neisseria flavescens	Gram-																				645563256
Bacteroides fragilis 3_1_12	645058788	Bacteroidaceae	Bacteroidia	Bacteroidales	457424	Bacteroidota	Bacteroides	Bacteroides fragilis	Gram-		645276304	645276303	645276302				645277295	645277294	645277293
Weissella paramesenteroides ATCC 33313	645058793	Lactobacillaceae	Bacilli	Lactobacillales	585506	Bacillota	Weissella	Weissella paramesenteroides	Gram+						645479418	645479257
Rothia mucilaginosa ATCC 25296	645058800	Micrococcaceae	Actinomycetes	Micrococcales	553201	Actinomycetota	Rothia	Rothia mucilaginosa	Gram+						645628692
Staphylococcus aureus aureus TCH130	645058811	Staphylococcaceae	Bacilli	Bacillales	548474	Bacillota	Staphylococcus	Staphylococcus aureus	Gram+		645437422	645437423	645437424		645438475		645438466	645438469|645438467	645438468	645438283| 645438736| 645437740								645437315		645438286	645438285						645437161	645437160
Staphylococcus epidermidis BCM-HMP0060	645058812	Staphylococcaceae	Bacilli	Bacillales	525374	Bacillota	Staphylococcus	Staphylococcus epidermidis	Gram+						645441969		645441957|645441650	645441651|645441958|645441960|645441653	645441652|645441959	645441812| 645440841| 645441686										645441815	645441814						645440208	645440209
Staphylococcus warneri L37603, SK66	645058825	Staphylococcaceae	Bacilli	Bacillales	596319	Bacillota	Staphylococcus	Staphylococcus warneri	Gram+						645535849		645535862	645535861|645535859	645535860	645537624| 645536813| 645535965								645536592		645537627	645537626						645536447	645536446
Fusobacterium nucleatum animalis D11	645058833	Fusobacteriaceae	Fusobacteriia	Fusobacteriales	556264	Fusobacteriota	Fusobacterium	Fusobacterium animalis	Gram+
Gemella haemolysans ATCC 10379	645058834	Gemellaceae	Bacilli	Bacillales	546270	Bacillota	Gemella	Gemella haemolysans	Gram+							645356768
Escherichia coli D9	645058835	Enterobacteriaceae	Gammaproteobacteria	Enterobacterales	556266	Pseudomonadota	Escherichia	Escherichia coli	Gram-		645347562	645347561	645347560			645348162	645346452|645344590	645346451|645344591|645344589	645346450|645344588	645344906| 645347205| 645347034				645347622	645347623	645347027	645347028	645346666		645347202	645347203				645344797	645344796
Staphylococcus epidermidis M23864:W1	645058850	Staphylococcaceae	Bacilli	Bacillales	525378	Bacillota	Staphylococcus	Staphylococcus caprae	Gram+		645468792	645468791	645468790		645468354		645468366	645468365|645468363	645468364	645468544| 645469922								645469074		645468541	645468542						645469228	645469229
Staphylococcus epidermidis W23144	645058851	Staphylococcaceae	Bacilli	Bacillales	525376	Bacillota	Staphylococcus	Staphylococcus epidermidis	Gram+						645472780		645472452|645472768	645472455|645472769|645472453|645472771	645472770|645472454	645472630| 645472490| 645471618								645470901		645472633	645472632						645471075	645471076
Selenomonas sputigena ATCC 35185	645951802	Selenomonadaceae	Negativicutes	Selenomonadales	546271	Bacillota	Selenomonas	Selenomonas sputigena	Gram-
Fusobacterium gonidiaformans ATCC 25563	645951804	Fusobacteriaceae	Fusobacteriia	Fusobacteriales	469615	Fusobacteriota	Fusobacterium	Fusobacterium gonidiaformans	Gram-																				645968905
Prevotella oris F0302	645951806	Prevotellaceae	Bacteroidia	Bacteroidales	649760	Bacteroidota	Segatella	Segatella oris	Gram-
Selenomonas noxia ATCC 43541	645951808	Selenomonadaceae	Negativicutes	Selenomonadales	585503	Bacillota	Selenomonas	Selenomonas noxia	Gram+
Enhydrobacter aerosaccus SK60	645951810	unclassified	Alphaproteobacteria	Hyphomicrobiales	553217	Pseudomonadota	Enhydrobacter	Enhydrobacter aerosaccus	Gram-							646167146				646167754								646167727
Granulicatella adiacens ATCC 49175	645951817	Carnobacteriaceae	Bacilli	Lactobacillales	638301	Bacillota	Granulicatella	Granulicatella adiacens	Gram+											646090055
Cardiobacterium hominis ATCC 15826	645951819	Cardiobacteriaceae	Gammaproteobacteria	Cardiobacteriales	638300	Pseudomonadota	Cardiobacterium	Cardiobacterium hominis	Gram-															646087699
Actinomyces sp. oral taxon 848 F0332	645951824	Actinomycetaceae	Actinomycetes	Actinomycetales	649743	Actinomycetota	Actinomyces	Actinomyces sp. oral taxon 848	Gram+							646140298				646140503								646139684	646140987
Hallella bergensis DSM 17361	645951825	Prevotellaceae	Bacteroidia	Bacteroidales	585502	Bacteroidota	Hallella	Hallella bergensis	Gram-		646084697	646084698	646084699							646084231												646084338	646084339	646084342
Faecalibacterium prausnitzii A2-165	645951831	Oscillospiraceae	Clostridia	Eubacteriales	411483	Bacillota	Faecalibacterium	Faecalibacterium duncaniae	Gram+
Lactobacillus iners DSM 13335	645951832	Lactobacillaceae	Bacilli	Lactobacillales	525328	Bacillota	Lactobacillus	Lactobacillus iners	Gram+							646112631
Dialister invisus DSM 15470	645951833	Veillonellaceae	Negativicutes	Veillonellales	592028	Bacillota	Dialister	Dialister invisus	Gram+																				646032374								646034169	646034168
Butyrivibrio crossotus DSM 2876	645951834	Lachnospiraceae	Clostridia	Lachnospirales	511680	Bacillota	Eshraghiella	Eshraghiella crossota	Gram+											645959912
Hungatella hathewayi DSM 13479	645951835	Lachnospiraceae	Clostridia	Lachnospirales	566550	Bacillota	Hungatella	Hungatella hathewayi	Gram+											646035416
Prevotella veroralis F0319	645951836	Prevotellaceae	Bacteroidia	Bacteroidales	649761	Bacteroidota	Prevotella	Prevotella veroralis	Gram-							646147273
Slackia exigua ATCC 700122	645951837	Eggerthellaceae	Coriobacteriia	Eggerthellales	649764	Actinomycetota	Slackia	Slackia exigua	Gram+																			646136728
Limosilactobacillus antri DSM 16041	645951838	Lactobacillaceae	Bacilli	Lactobacillales	525309	Bacillota	Limosilactobacillus	Limosilactobacillus antri	Gram+						646108708
Alloprevotella tannerae ATCC 51259	645951840	Prevotellaceae	Bacteroidia	Bacteroidales	626522	Bacteroidota	Alloprevotella	Alloprevotella tannerae	Gram-
Corynebacterium efficiens YS-314, DSM 44549	645951842	Corynebacteriaceae	Actinomycetes	Mycobacteriales	196164	Actinomycetota	Corynebacterium	Corynebacterium efficiens	Gram+											646102871| 646100677| 646102091| 646100782								646100757							646100947	646100945
Aeromicrobium marinum DSM 15272	645951844	Nocardioidaceae	Actinomycetes	Propionibacteriales	585531	Actinomycetota	Aeromicrobium	Aeromicrobium marinum	Gram+											646092238
Fusobacterium periodonticum ATCC 33693	645951848	Fusobacteriaceae	Fusobacteriia	Fusobacteriales	546275	Fusobacteriota	Fusobacterium	Fusobacterium periodonticum	Gram-
Jonquetella anthropi E3_33 E1	645951855	Dethiosulfovibrionaceae	Synergistia	Synergistales	645512	Synergistota	Jonquetella	Jonquetella anthropi	Gram-											646118348| 646119372
Enterococcus faecium DO	645951856	Enterococcaceae	Bacilli	Lactobacillales	333849	Bacillota	Enterococcus	Enterococcus faecium	Gram+	Halotolerant					646042588	646042611
Campylobacter gracilis ATCC 33236	645951857	Campylobacteraceae	Epsilonproteobacteria	Campylobacterales	553220	Campylobacterota	Campylobacter	Campylobacter gracilis	Gram-
Leptotrichia hofstadii F0254	645951860	Leptotrichiaceae	Fusobacteriia	Fusobacteriales	634994	Fusobacteriota	Leptotrichia	Leptotrichia hofstadii	Gram-																												646148452	646148450
Lactobacillus helveticus DSM 20075	645951865	Lactobacillaceae	Bacilli	Lactobacillales	585520	Bacillota	Lactobacillus	Lactobacillus helveticus	Gram+							646110885| 646111455
Fusobacterium gonidiaformans 3-1-5R	645951866	Fusobacteriaceae	Fusobacteriia	Fusobacteriales	469605	Fusobacteriota	Fusobacterium	Fusobacterium gonidiaformans	Gram-
Treponema vincentii ATCC 35580	645951869	Treponemataceae	Spirochaetia	Spirochaetales	596324	Spirochaetota	Treponema	Treponema vincentii	Gram-											646164170
Corynebacterium aurimucosum CN-1, ATCC 700975	645951870	Corynebacteriaceae	Actinomycetes	Mycobacteriales	548476	Actinomycetota	Corynebacterium	Corynebacterium aurimucosum	Gram+											646098415| 646100270| 646098749										646098750	646098748				646099074	646099072
Oxalobacter paraformigenes HOxBLS	646206250	Oxalobacteraceae	Betaproteobacteria	Burkholderiales	556268	Pseudomonadota	Oxalobacter	Oxalobacter paraformigenes	Gram-		646259880	646259879	646259878			646259908
Coprobacillus sp. D7	646206251	Coprobacillaceae	Erysipelotrichia	Erysipelotrichales	556270	Bacillota	Coprobacillus	Coprobacillus sp. D7	Gram+
Fusobacterium nucleatum vincentii 4_1_13	646206253	Fusobacteriaceae	Fusobacteriia	Fusobacteriales	469606	Fusobacteriota	Fusobacterium	Fusobacterium vincentii	Gram-																												646254908	646254909
Fusobacterium mortiferum ATCC 9817	646206254	Fusobacteriaceae	Fusobacteriia	Fusobacteriales	469616	Fusobacteriota	Fusobacterium	Fusobacterium mortiferum	Gram-
Helicobacter winghamensis ATCC BAA-430	646206255	Helicobacteraceae	Epsilonproteobacteria	Campylobacterales	556267	Campylobacterota	Helicobacter	Helicobacter winghamensis	Gram-
Citrobacter portucalensis 30_2	646206256	Enterobacteriaceae	Gammaproteobacteria	Enterobacterales	1639133	Pseudomonadota	Citrobacter	Citrobacter portucalensis	Gram-		646244104	646244103	646244102	646244105		646247627	646246166	646246167	646246168	646245289| 646247010				646247238	646247239	646247018	646247017	646248153| 646246983
Phocaeicola dorei 5_1_36/D4	646206258	Bacteroidaceae	Bacteroidia	Bacteroidales	556260	Bacteroidota	Phocaeicola	Phocaeicola dorei	Gram-
Escherichia coli 3_2_53FAA	646206259	Enterobacteriaceae	Gammaproteobacteria	Enterobacterales	562	Pseudomonadota	Escherichia	Escherichia coli	Gram-		646206772	646206773	646206774	646206771		646211092	646207990|646209219	646207989|646209218|646209220	646207988|646209221	646207136| 646210374				646210624	646210625	646210381	646210380	646209884		646207139	646207138				646208864	646208865
Clostridium sp. 7_2_43FAA	646206260	Clostridiaceae	Clostridia	Eubacteriales	457396	Bacillota	Clostridium	Clostridium sp. 7_2_43FAA	Gram+		646236880	646236881	646236882			646238092
Escherichia sp. 1_1_43	646206261	Enterobacteriaceae	Gammaproteobacteria	Enterobacterales	457400	Pseudomonadota	Escherichia	Escherichia sp. 1_1_43	Gram-							646268237				646266615| 646266737								646266393
Fusobacterium periodonticum 2_1_31	646206262	Fusobacteriaceae	Fusobacteriia	Fusobacteriales	469599	Fusobacteriota	Fusobacterium	Fusobacterium periodonticum	Gram-																												646252579	646252580
Bacteroides sp. 9_1_42FAA	646206263	Bacteroidaceae	Bacteroidia	Bacteroidales	457395	Bacteroidota	Bacteroides	Bacteroides sp. 9_1_42FAA	Gram-
Bacteroides sp. D1	646206264	Bacteroidaceae	Bacteroidia	Bacteroidales	556258	Bacteroidota	Bacteroides	Bacteroides sp. D1	Gram-		646221365	646221364	646221363	646221366			646220355	646220354	646220353
Oxalobacter formigenes OXCC13	646206265	Oxalobacteraceae	Betaproteobacteria	Burkholderiales	556269	Pseudomonadota	Oxalobacter	Oxalobacter formigenes	Gram-							646262121
Bacteroides sp. 2_2_4	646206266	Bacteroidaceae	Bacteroidia	Bacteroidales	469590	Bacteroidota	Bacteroides	Bacteroides sp. 2_2_4	Gram-		646226853	646226854	646226855				646222022	646222021	646222020
Acinetobacter calcoaceticus RUH2202	646206267	Moraxellaceae	Gammaproteobacteria	Moraxellales	575585	Pseudomonadota	Acinetobacter	Acinetobacter calcoaceticus	Gram-		646296939	646296938	646296937			646297822				646297380| 646297885| 646295697| 646297379								646297347| 646295897		646297383	646297382				646297508	646297507
Acinetobacter johnsonii SH046	646206268	Moraxellaceae	Gammaproteobacteria	Moraxellales	575586	Pseudomonadota	Acinetobacter	Acinetobacter johnsonii	Gram-		646300792	646300791	646300790			646299133| 646301854				646301181| 646301815								646299682		646301178	646301179				646302466|646299286	646299285|646302467
Acinetobacter junii SH205	646206269	Moraxellaceae	Gammaproteobacteria	Moraxellales	575587	Pseudomonadota	Acinetobacter	Acinetobacter junii	Gram-		646305190	646305191	646305192			646304635| 646303931				646305619								646305334
Acinetobacter lwoffii SH145	646206270	Moraxellaceae	Gammaproteobacteria	Moraxellales	575588	Pseudomonadota	Acinetobacter	Acinetobacter lwoffii	Gram-		646308358	646308359	646308360			646306118| 646308765				646308168| 646307399										646307396	646307397				646306688	646306689
Acinetobacter radioresistens SH164	646206271	Moraxellaceae	Gammaproteobacteria	Moraxellales	575589	Pseudomonadota	Acinetobacter	Acinetobacter radioresistens	Gram-		646310274	646310275	646310276			646311422				646311441| 646310148								646310162		646310151	646310150				646310066	646310067
Bacteroides thetaiotaomicron 1_1_6	646206272	Bacteroidaceae	Bacteroidia	Bacteroidales	818	Bacteroidota	Bacteroides	Bacteroides thetaiotaomicron	Gram-
Bacteroides sp. 4_3_47FAA	646206274	Bacteroidaceae	Bacteroidia	Bacteroidales	457394	Bacteroidota	Bacteroides	Bacteroides sp. 4_3_47FAA	Gram-
Fusobacterium varium ATCC 27725	646206275	Fusobacteriaceae	Fusobacteriia	Fusobacteriales	469618	Fusobacteriota	Fusobacterium	Fusobacterium varium	Gram-		646282863	646282862	646282861				646283409	646283408	646283407																		646284304	646284303
Limosilactobacillus coleohominis 101-4-CHN	646206276	Lactobacillaceae	Bacilli	Lactobacillales	575594	Bacillota	Limosilactobacillus	Limosilactobacillus coleohominis	Gram+						646291190	646290336
Lactobacillus crispatus MV-1A-US	646206277	Lactobacillaceae	Bacilli	Lactobacillales	575596	Bacillota	Lactobacillus	Lactobacillus crispatus	Gram+							646293630| 646293916
Lactobacillus jensenii 27-2-CHN	646206278	Lactobacillaceae	Bacilli	Lactobacillales	575606	Bacillota	Lactobacillus	Lactobacillus jensenii	Gram+							646292855
Parabacteroides sp. D13	646206279	Tannerellaceae	Bacteroidia	Bacteroidales	563193	Bacteroidota	Parabacteroides	Parabacteroides sp. D13	Gram-		646286547	646286548	646286549
Gardnerella vaginalis 409-05	646311928	Bifidobacteriaceae	Actinomycetes	Bifidobacteriales	553190	Actinomycetota	Gardnerella	Gardnerella vaginalis	Gram+							646483335
Mageeibacillus indolicus UPII9-5	646564521	Oscillospiraceae	Clostridia	Eubacteriales	699246	Bacillota	Mageeibacillus	Mageeibacillus indolicus	Gram+
Cutibacterium acnes SK137	646564561	Propionibacteriaceae	Actinomycetes	Propionibacteriales	553199	Actinomycetota	Cutibacterium	Cutibacterium acnes	Gram+		646741840	646741841	646741842	646741839	646742830	646743952	646743250	646743249	646743248									646742414							646742731	646742732
Escherichia coli O150:H5 SE15	646862327	Enterobacteriaceae	Gammaproteobacteria	Enterobacterales	431946	Pseudomonadota	Escherichia	Escherichia coli	Gram-		646869961	646869960	646869959			646872978	646871836|646871361	646871837|646871360|646871362	646871838|646871363	646869612| 646869357				646872559	646872560	646869364	646869363	646873401		646869609	646869610				646871094	646871095
Lacticaseibacillus rhamnosus GG	646862332	Lactobacillaceae	Bacilli	Lactobacillales	568703	Bacillota	Lacticaseibacillus	Lacticaseibacillus rhamnosus	Gram+						646897877	646897987	646897791|646895749	646897790|646895746|646895748	646897789|646895747																		646898252	646898253
Achromobacter piechaudii ATCC 43553	647000200	Alcaligenaceae	Betaproteobacteria	Burkholderiales	742159	Pseudomonadota	Achromobacter	Achromobacter piechaudii	Gram-		647462507	647462506	647462505	647462508		647463130				647464615| 647462635| 647466296	647463237	647463238	647463239							647466293	647466294
Acinetobacter haemolyticus ATCC 19194	647000202	Moraxellaceae	Gammaproteobacteria	Moraxellales	707232	Pseudomonadota	Acinetobacter	Acinetobacter haemolyticus	Gram-		647469418	647469417	647469416			647469939				647467095| 647467819	647467510	647467511	647467512												647468316	647468317
Acinetobacter baumannii 6013150	647000204	Moraxellaceae	Gammaproteobacteria	Moraxellales	525243	Pseudomonadota	Acinetobacter	Acinetobacter baumannii	Gram-							647115221				647115852| 647116612| 647116613| 647116956								647116583| 647115625	647114921
Schaalia odontolytica F0309	647000206	Actinomycetaceae	Actinomycetes	Actinomycetales	649742	Actinomycetota	Schaalia	Schaalia odontolytica	Gram+						647127231
Aerococcus viridans ATCC 11563	647000207	Aerococcaceae	Bacilli	Lactobacillales	655812	Bacillota	Aerococcus	Aerococcus viridans	Gram+								647492879|647492581	647492880|647492580|647492578	647492881|647492579|647492883|647492882																		647492181	647492182
Bacteroides ovatus SD CC 2a	647000212	Bacteroidaceae	Bacteroidia	Bacteroidales	702444	Bacteroidota	Bacteroides	Bacteroides xylanisolvens	Gram-
Bacteroides ovatus SD CMC 3f	647000213	Bacteroidaceae	Bacteroidia	Bacteroidales	702443	Bacteroidota	Bacteroides	Bacteroides ovatus	Gram-		647451784	647451785	647451786	647451783			647454830	647454829	647454828
Phocaeicola vulgatus PC510	647000214	Bacteroidaceae	Bacteroidia	Bacteroidales	702446	Bacteroidota	Phocaeicola	Phocaeicola vulgatus	Gram-
Bacteroides xylanisolvens SD CC 1b	647000215	Bacteroidaceae	Bacteroidia	Bacteroidales	702447	Bacteroidota	Bacteroides	Bacteroides xylanisolvens	Gram-		647442066	647442065	647442064	647442067			647440118	647440119	647440120
Brevibacterium mcbrellneri ATCC 49030	647000216	Brevibacteriaceae	Actinomycetes	Micrococcales	585530	Actinomycetota	Brevibacterium	Brevibacterium mcbrellneri	Gram+		647493980	647493981	647493982		647494277					647494682| 647494982								647494771
Bulleidia extructa W1219	647000218	Erysipelotrichaceae	Erysipelotrichia	Erysipelotrichales	679192	Bacillota	Bulleidia	Bulleidia extructa	Gram+																												647359754	647359753
Clostridioides difficile NAP07	647000227	Peptostreptococcaceae	Clostridia	Peptostreptococcales	525258	Bacillota	Clostridioides	Clostridioides difficile	Gram+
Clostridioides difficile NAP08	647000228	Peptostreptococcaceae	Clostridia	Peptostreptococcales	525259	Bacillota	Clostridioides	Clostridioides difficile	Gram+		647510504	647510505	647510506																								647510889	647510888
Corynebacterium ammoniagenes DSM 20306	647000230	Corynebacteriaceae	Actinomycetes	Mycobacteriales	649754	Actinomycetota	Corynebacterium	Corynebacterium ammoniagenes	Gram+											647491649| 647489857| 647491524| 647491691| 647491408									647491105	647490133|647491693	647491692				647490556	647490558
Corynebacterium jeikeium ATCC 43734	647000231	Corynebacteriaceae	Actinomycetes	Mycobacteriales	525262	Actinomycetota	Corynebacterium	Corynebacterium jeikeium	Gram+											647128081| 647128531| 647129235| 647129233									647127858
Edwardsiella tarda ATCC 23685	647000237	Hafniaceae	Gammaproteobacteria	Enterobacterales	500638	Pseudomonadota	Edwardsiella	Edwardsiella tarda	Gram-							647371238				647369217				647370942	647370943			647368008	647367596
Enterococcus faecium PC4.1	647000238	Enterococcaceae	Bacilli	Lactobacillales	791161	Bacillota	Enterococcus	Enterococcus faecium	Gram+						647447052	647447029	647447056	647447053|647447055	647447054																		647444967	647444968
Enterococcus faecalis R712	647000239	Enterococcaceae	Bacilli	Lactobacillales	699186	Bacillota	Enterococcus	Enterococcus faecalis	Gram+						647311202	647311214	647311207	647311204|647311206	647311205																		647312397	647312398
Enterococcus faecalis S613	647000240	Enterococcaceae	Bacilli	Lactobacillales	699185	Bacillota	Enterococcus	Enterococcus faecalis	Gram+						647308624	647308612	647308619	647308622|647308620	647308621																		647309073	647309074
Fusobacterium nucleatum nucleatum ATCC 23726	647000254	Fusobacteriaceae	Fusobacteriia	Fusobacteriales	525283	Fusobacteriota	Fusobacterium	Fusobacterium nucleatum	Gram-																												647527091	647527092
Klebsiella pneumoniae rhinoscleromatis ATCC 13884	647000262	Enterobacteriaceae	Gammaproteobacteria	Enterobacterales	667127	Pseudomonadota	Klebsiella	Klebsiella pneumoniae	Gram-		647151213	647151214	647151215			647150351	647153837	647153839|647150148|647150151	647153840|647150152	647153559| 647151333| 647152185				647155067	647155068	647154804	647154805	647154829| 647155340		647151336	647151335				647151971	647151972
Lactobacillus amylolyticus DSM 11664	647000263	Lactobacillaceae	Bacilli	Lactobacillales	585524	Bacillota	Lactobacillus	Lactobacillus amylolyticus	Gram+							647513050
Lactobacillus crispatus 214-1	647000264	Lactobacillaceae	Bacilli	Lactobacillales	679188	Bacillota	Lactobacillus	Lactobacillus crispatus	Gram+							647378334| 647378066
Lactobacillus gasseri 224-1	647000265	Lactobacillaceae	Bacilli	Lactobacillales	679196	Bacillota	Lactobacillus	Lactobacillus gasseri	Gram+							647364821| 647364822																					647363236	647363235
Pseudoleptotrichia goodfellowii F0264	647000268	Leptotrichiaceae	Fusobacteriia	Fusobacteriales	596323	Fusobacteriota	Pseudoleptotrichia	Pseudoleptotrichia goodfellowii	Gram-																							647212133	647212130	647212134			647212043	647212044
Megasphaera genomosp. type_1 28L	647000271	Veillonellaceae	Negativicutes	Veillonellales	699218	Bacillota	Megasphaera	Megasphaera genomosp. type_1	Gram-
Micrococcus luteus SK58	647000274	Micrococcaceae	Actinomycetes	Micrococcales	596312	Actinomycetota	Micrococcus	Micrococcus luteus	Gram+						647280549					647279391
Mobiluncus mulieris 28-1	647000277	Actinomycetaceae	Actinomycetes	Actinomycetales	596328	Actinomycetota	Mobiluncus	Mobiluncus mulieris	Gram+
Mycobacterium parascrofulaceum ATCC BAA-614	647000278	Mycobacteriaceae	Actinomycetes	Mycobacteriales	525368	Actinomycetota	Mycobacterium	Mycobacterium parascrofulaceum	Gram+						647502734| 647501419													647501985| 647499178
Neisseria elongata glycolytica ATCC 29315	647000283	Neisseriaceae	Betaproteobacteria	Neisseriales	546263	Pseudomonadota	Neisseria	Neisseria elongata	Gram-																												647244680	647244681
Neisseria polysaccharea ATCC 43768	647000284	Neisseriaceae	Betaproteobacteria	Neisseriales	546267	Pseudomonadota	Neisseria	Neisseria polysaccharea	Gram-											647242885
Oribacterium sp. oral taxon 078 F0262	647000286	Lachnospiraceae	Clostridia	Lachnospirales	608534	Bacillota	Oribacterium	Oribacterium sp. oral taxon 078	Gram+											647054048| 647054548
Pasteurella dagmatis ATCC 43325	647000288	Pasteurellaceae	Gammaproteobacteria	Pasteurellales	667128	Pseudomonadota	Pasteurella	Pasteurella dagmatis	Gram-											647186607																	647185941	647185942
Peptoniphilus lacrimalis 315-B	647000289	Peptoniphilaceae	Tissierellia	Tissierellales	596330	Bacillota	Peptoniphilus	Peptoniphilus lacrimalis	Gram+
Peptostreptococcus anaerobius 653-L	647000290	Peptostreptococcaceae	Clostridia	Peptostreptococcales	596329	Bacillota	Peptostreptococcus	Peptostreptococcus anaerobius	Gram+
Prevotella bivia JCVIHMP010	647000292	Prevotellaceae	Bacteroidia	Bacteroidales	553171	Bacteroidota	Prevotella	Prevotella bivia	Gram-							647354695
Hoylesella buccalis ATCC 35310	647000293	Prevotellaceae	Bacteroidia	Bacteroidales	679190	Bacteroidota	Hoylesella	Hoylesella buccalis	Gram-		647315111	647315112	647315113	647315110		647316101				647317222
Prevotella sp. F0295	647000294	Prevotellaceae	Bacteroidia	Bacteroidales	619693	Bacteroidota	Prevotella	Prevotella sp. oral taxon 472	Gram-
Hoylesella timonensis CRIS 5C-B1	647000295	Prevotellaceae	Bacteroidia	Bacteroidales	679189	Bacteroidota	Hoylesella	Hoylesella timonensis	Gram-
Cutibacterium acnes J139	647000296	Propionibacteriaceae	Actinomycetes	Propionibacteriales	679194	Actinomycetota	Cutibacterium	Cutibacterium acnes	Gram+		647360725	647360726	647360727	647360724	647361576	647362565	647362211	647362210	647362209									647361989							647361679	647361678
Cutibacterium acnes J165	647000297	Propionibacteriaceae	Actinomycetes	Propionibacteriales	679195	Actinomycetota	Cutibacterium	Cutibacterium acnes	Gram+						647414707	647415451												647414189
Cutibacterium acnes SK187	647000298	Propionibacteriaceae	Actinomycetes	Propionibacteriales	686659	Actinomycetota	Cutibacterium	Cutibacterium acnes	Gram+		647416620	647416621	647416622	647416619	647417531	647418382	647418766	647418767	647418768									647418088							647417429	647417430
Pyramidobacter piscolens W5455	647000302	Dethiosulfovibrionaceae	Synergistia	Synergistales	352165	Synergistota	Pyramidobacter	Pyramidobacter piscolens	Gram-											647358150
Prescottella equi ATCC 33707	647000305	Nocardiaceae	Actinomycetes	Mycobacteriales	525370	Actinomycetota	Prescottella	Prescottella equi	Gram+		647504618	647504617	647504616		647505688| 647503685					647507128| 647502932	647504482	647504483	647504484					647503163| 647506006
Serratia odorifera DSM 4582	647000312	Yersiniaceae	Gammaproteobacteria	Enterobacterales	667129	Pseudomonadota	Serratia	Serratia odorifera	Gram-		647266619	647266620	647266621			647263011	647264109	647264108	647264107|647264106	647266389| 647266037				647262667	647262668	647262239	647262240	647262261| 647265772| 647265981		647266385	647266386
Staphylococcus aureus aureus ATCC 51811	647000321	Staphylococcaceae	Bacilli	Bacillales	762962	Bacillota	Staphylococcus	Staphylococcus aureus	Gram+						647538324					647538143| 647536608| 647538579								647537323
Staphylococcus epidermidis M23864:W2(grey)	647000323	Staphylococcaceae	Bacilli	Bacillales	525375	Bacillota	Staphylococcus	Staphylococcus epidermidis	Gram+						647471225					647471379| 647471508| 647470780
Staphylococcus epidermidis SK135	647000324	Staphylococcaceae	Bacilli	Bacillales	596317	Bacillota	Staphylococcus	Staphylococcus epidermidis	Gram+						647321440		647323047|647321428	647323048|647323050|647321429|647321431	647323049|647321430	647323192| 647322549| 647323083										647323197	647323196						647321997	647321996
Streptococcus oralis SK23, ATCC 35037	647000325	Streptococcaceae	Bacilli	Lactobacillales	655813	Bacillota	Streptococcus	Streptococcus oralis	Gram+						647473149																	647473620	647473619	647473621			647474435	647474434
Turicibacter sanguinis PC909	647000330	Turicibacteraceae	Erysipelotrichia	Erysipelotrichales	702450	Bacillota	Turicibacter	Turicibacter sanguinis	Gram+
Veillonella parvula ATCC 17745	647000331	Veillonellaceae	Negativicutes	Veillonellales	686660	Bacillota	Veillonella	Veillonella parvula	Gram-											647365654									647366560
Acinetobacter baumannii ATCC 19606	647533101	Moraxellaceae	Gammaproteobacteria	Moraxellales	575584	Pseudomonadota	Acinetobacter	Acinetobacter baumannii								647833357				647832221| 647832339| 647834454| 647832338								647830980| 647832369
Acinetobacter pittii SH024	647533108	Moraxellaceae	Gammaproteobacteria	Moraxellales	575565	Pseudomonadota	Acinetobacter	Acinetobacter sp. SH024	Gram-							647978738				647977100| 647978693| 647977009| 647977008								647979443| 647976978
Bacteroides fragilis 2_1_16	647533110	Bacteroidaceae	Bacteroidia	Bacteroidales	817	Bacteroidota	Bacteroides	Bacteroides fragilis	Gram-		647885456	647885457	647885458				647885905	647885906	647885907
Bacteroides sp. 2_1_22	647533111	Bacteroidaceae	Bacteroidia	Bacteroidales	469588	Bacteroidota	Bacteroides	Bacteroides sp. 2_1_22	Gram-		647882834	647882835	647882836				647882454|647877981	647882455|647877980	647882456|647877979
Bacteroides sp. 2_1_33B	647533112	Bacteroidaceae	Bacteroidia	Bacteroidales	469589	Bacteroidota	Bacteroides	Bacteroides sp. 2_1_33B	Gram-		647875383	647875382	647875381
Bacteroides sp. 3_1_33FAA	647533113	Bacteroidaceae	Bacteroidia	Bacteroidales	457391	Bacteroidota	Bacteroides	Bacteroides sp. 3_1_33FAA	Gram-
Bacteroides sp. D20	647533114	Bacteroidaceae	Bacteroidia	Bacteroidales	585543	Bacteroidota	Bacteroides	Bacteroides sp. D20	Gram-		647898282	647898283	647898284							647896673
Fusobacterium periodonticum 1_1_41FAA	647533168	Fusobacteriaceae	Fusobacteriia	Fusobacteriales	469621	Fusobacteriota	Fusobacterium	Fusobacterium periodonticum	Gram-																												647998529	647998528
Granulicatella elegans ATCC 700633	647533172	Carnobacteriaceae	Bacilli	Lactobacillales	626369	Bacillota	Granulicatella	Granulicatella elegans	Gram+											647823808
Klebsiella variicola 1_1_55	647533174	Enterobacteriaceae	Gammaproteobacteria	Enterobacterales	244366	Pseudomonadota	Klebsiella	Klebsiella variicola	Gram-							647940576				647939639| 647939206								647941569| 647941257	647939667
Lactobacillus crispatus 125-2-CHN	647533176	Lactobacillaceae	Bacilli	Lactobacillales	575595	Bacillota	Lactobacillus	Lactobacillus crispatus	Gram+							647784478| 647784155												647784491
Lactobacillus crispatus MV-3A-US	647533177	Lactobacillaceae	Bacilli	Lactobacillales	575597	Bacillota	Lactobacillus	Lactobacillus crispatus	Gram+							647848480| 647847889
Limosilactobacillus fermentum 28-3-CHN	647533178	Lactobacillaceae	Bacilli	Lactobacillales	575599	Bacillota	Limosilactobacillus	Limosilactobacillus fermentum	Gram+						647851731	647851558
Lactobacillus jensenii 115-3-CHN	647533179	Lactobacillaceae	Bacilli	Lactobacillales	575605	Bacillota	Lactobacillus	Lactobacillus jensenii	Gram+							647853505
Lactobacillus jensenii SJ-7A-US	647533180	Lactobacillaceae	Bacilli	Lactobacillales	575607	Bacillota	Lactobacillus	Lactobacillus jensenii	Gram+							647849702
Paenibacillus sp. D14	647533191	Paenibacillaceae	Bacilli	Bacillales	621372	Bacillota	Paenibacillus	Paenibacillus sp. oral taxon 786	Gram+						647770869		647773536	647773535	647773534	647773216												647773001	647773002	647773000
Parascardovia denticolens F0305	647533193	Bifidobacteriaceae	Actinomycetes	Bifidobacteriales	641144	Actinomycetota	Parascardovia	Parascardovia denticolens	Gram+							647993643																					647993938	647993937
Pediococcus acidilactici 7_4	647533194	Lactobacillaceae	Bacilli	Lactobacillales	563194	Bacillota	Pediococcus	Pediococcus acidilactici	Gram+						647893226		647892599	647892600|647892602	647892601	647892616																	647893430	647893431
Prevotella buccae D17	647533195	Prevotellaceae	Bacteroidia	Bacteroidales	575611	Bacteroidota	Segatella	Segatella buccae	Gram-
Prevotella melaninogenica D18	647533196	Prevotellaceae	Bacteroidia	Bacteroidales	575612	Bacteroidota	Prevotella	Prevotella melaninogenica	Gram-							647931570
Prevotella sp. F0039	647533197	Prevotellaceae	Bacteroidia	Bacteroidales	575614	Bacteroidota	Prevotella	Prevotella sp. oral taxon 299	Gram-
Prevotella sp. F0108	647533198	Prevotellaceae	Bacteroidia	Bacteroidales	575615	Bacteroidota	Prevotella	Prevotella sp. oral taxon 317	Gram-
Scardovia inopinata F0304	647533207	Bifidobacteriaceae	Actinomycetes	Bifidobacteriales	641146	Actinomycetota	Scardovia	Scardovia inopinata	Gram+							647989793																					647989985	647989984
Streptococcus sp. 2_1_36FAA	647533231	Streptococcaceae	Bacilli	Lactobacillales	469609	Bacillota	Streptococcus	Streptococcus sp. 2_1_36FAA	Gram+						647855821
Streptococcus sp. M143	647533232	Streptococcaceae	Bacilli	Lactobacillales	563037	Bacillota	Streptococcus	Streptococcus sp. M143	Gram+						647894626																	647895513	647895514	647895512			647894783	647894784
Veillonella sp. 3_1_44	647533241	Veillonellaceae	Negativicutes	Veillonellales	457416	Bacillota	Veillonella	Veillonella sp. 3_1_44	Gram-											647987024
Veillonella sp. 6_1_27	647533242	Veillonellaceae	Negativicutes	Veillonellales	450749	Bacillota	Veillonella	Veillonella sp. 6_1_27	Gram-											647988998									647989107
Mobiluncus curtisii ATCC 43063	648028043	Actinomycetaceae	Actinomycetes	Actinomycetales	548479	Actinomycetota	Mobiluncus	Mobiluncus curtisii	Gram+																			648046942	648048385
Prevotella melaninogenica ATCC 25845	648028051	Prevotellaceae	Bacteroidia	Bacteroidales	553174	Bacteroidota	Prevotella	Prevotella melaninogenica	Gram-							648115814
Streptococcus pneumoniae TCH8431/19A	648028057	Streptococcaceae	Bacilli	Lactobacillales	525381	Bacillota	Streptococcus	Streptococcus pneumoniae	Gram+																							648053917	648053918	648053916			648054454	648054453
Fannyhessea vaginae PB189-T1-4	648276621	Atopobiaceae	Coriobacteriia	Coriobacteriales	866774	Actinomycetota	Fannyhessea	Fannyhessea vaginae	Gram+							648781651
Bifidobacterium dentium ATCC 27679	648276623	Bifidobacteriaceae	Actinomycetes	Bifidobacteriales	871562	Actinomycetota	Bifidobacterium	Bifidobacterium dentium	Gram+							648827642
Campylobacter coli JV20	648276627	Campylobacteraceae	Epsilonproteobacteria	Campylobacterales	864566	Campylobacterota	Campylobacter	Campylobacter coli	Gram-																			648828770| 648829185
Corynebacterium accolens ATCC 49726	648276632	Corynebacteriaceae	Actinomycetes	Mycobacteriales	862512	Actinomycetota	Corynebacterium	Corynebacterium accolens	Gram+											648799574| 648799234| 648799683| 648798849								648799396
Corynebacterium genitalium ATCC 33030	648276633	Corynebacteriaceae	Actinomycetes	Mycobacteriales	585529	Actinomycetota	Corynebacterium	Corynebacterium genitalium	Gram+											648324166| 648325168| 648323121
Corynebacterium matruchotii ATCC 14266	648276634	Corynebacteriaceae	Actinomycetes	Mycobacteriales	553207	Actinomycetota	Corynebacterium	Corynebacterium matruchotii	Gram+											648332106
Enterococcus faecalis TX0109	648276637	Enterococcaceae	Bacilli	Lactobacillales	749502	Bacillota	Enterococcus	Enterococcus faecalis	Gram+						648694790	648694802
Enterococcus faecalis TX0411	648276638	Enterococcaceae	Bacilli	Lactobacillales	749506	Bacillota	Enterococcus	Enterococcus faecalis	Gram+						648700360	648698809	648700355	648700356|648700358	648700357																		648697870	648697871
Enterococcus faecalis TX0855	648276639	Enterococcaceae	Bacilli	Lactobacillales	749511	Bacillota	Enterococcus	Enterococcus faecalis	Gram+		648685191	648685190	648685189		648685677	648685689	648685682	648685681|648685679	648685680																		648686318	648686319
Enterococcus faecalis TX0860	648276640	Enterococcaceae	Bacilli	Lactobacillales	749512	Bacillota	Enterococcus	Enterococcus faecalis	Gram+		648692081	648692082	648692083		648692179	648692167	648692174	648692175|648692177	648692176																		648693905	648693904
Enterococcus faecalis TX2134	648276641	Enterococcaceae	Bacilli	Lactobacillales	749518	Bacillota	Enterococcus	Enterococcus faecalis	Gram+						648691059	648689070
Enterococcus faecalis TX4248	648276642	Enterococcaceae	Bacilli	Lactobacillales	749495	Bacillota	Enterococcus	Enterococcus faecalis	Gram+						648681823	648681833	648681828	648681825|648681827	648681826																		648683573	648683574
Escherichia coli MS 107-1	648276649	Enterobacteriaceae	Gammaproteobacteria	Enterobacterales	679207	Pseudomonadota	Escherichia	Escherichia coli	Gram-		648658781	648658782	648658783	648658780		648655936	648656881|648659889	648656880|648659888|648659890	648656879|648659887	648657282| 648658138| 648660474| 648657039				648656395	648656394	648657048	648657046	648659032	648660424	648658141	648658140				648660905	648660906
Escherichia coli MS 115-1	648276650	Enterobacteriaceae	Gammaproteobacteria	Enterobacterales	749537	Pseudomonadota	Escherichia	Escherichia coli	Gram-		648535792	648535793	648535794	648535791		648531661	648532069|648532270	648532070|648532269|648532271	648532071|648532268	648532837| 648531784| 648534678				648534481	648534480	648534685	648534684	648535920		648531787	648531786
Escherichia coli MS 116-1	648276651	Enterobacteriaceae	Gammaproteobacteria	Enterobacterales	749538	Pseudomonadota	Escherichia	Escherichia coli	Gram-		648578048	648578047	648578046	648578049		648577533	648576075|648575291	648576076|648575290|648575292	648576077|648575293	648578239| 648573619| 648576405| 648575675				648574062	648574061	648575682	648575681	648574829		648573616	648573617				648578349	648578350
Escherichia coli MS 119-7	648276652	Enterobacteriaceae	Gammaproteobacteria	Enterobacterales	679206	Pseudomonadota	Escherichia	Escherichia coli	Gram-							648654859				648653449| 648651846| 648650698| 648652239								648651467
Escherichia coli MS 124-1	648276653	Enterobacteriaceae	Gammaproteobacteria	Enterobacterales	679205	Pseudomonadota	Escherichia	Escherichia coli	Gram-		648645085	648645084	648645083	648645086		648648558	648648956|648648121	648648955|648648120|648648122	648648954|648648123	648648849| 648644350| 648648019				648645134	648645135	648648011	648648012	648645721	648645276	648644347	648644348				648648187	648648188
Escherichia coli MS 146-1	648276654	Enterobacteriaceae	Gammaproteobacteria	Enterobacterales	749540	Pseudomonadota	Escherichia	Escherichia coli	Gram-		648544484	648544485	648544486	648544483		648542536	648543914|648542754	648543913|648542755|648542753	648543912|648542756	648544250| 648545561| 648546819				648544334	648544335	648546812	648546813	648543296	648545245						648544146	648544145
Escherichia coli MS 175-1	648276655	Enterobacteriaceae	Gammaproteobacteria	Enterobacterales	749544	Pseudomonadota	Escherichia	Escherichia coli	Gram-		648583734	648583733	648583732	648583735		648583244	648582001|648580501	648582002|648580500|648580502	648582003|648580499	648581307| 648579423| 648580153| 648581558				648581501	648581500	648581565	648581564	648578896		648580156	648580155				648581200	648581199
Escherichia coli MS 182-1	648276656	Enterobacteriaceae	Gammaproteobacteria	Enterobacterales	749545	Pseudomonadota	Escherichia	Escherichia coli	Gram-		648541684	648541685	648541686	648541683		648540159	648537500|648539158	648537499|648539157|648539159	648537498|648539156	648539497| 648538500| 648538698				648541476	648541475	648538691	648538692	648539046		648538503	648538502				648539613	648539614
Escherichia coli MS 185-1	648276657	Enterobacteriaceae	Gammaproteobacteria	Enterobacterales	749546	Pseudomonadota	Escherichia	Escherichia coli	Gram-		648595107	648595106	648595105	648595108		648596563	648599369|648597800	648599370|648597801|648597799	648599371|648597802	648595018| 648597389				648599303	648599302	648597397	648597396	648596658		648595015	648595016				648599586	648599585
Escherichia coli MS 187-1	648276658	Enterobacteriaceae	Gammaproteobacteria	Enterobacterales	749547	Pseudomonadota	Escherichia	Escherichia coli	Gram-							648562525				648558209| 648557970| 648558968								648560709	648559487
Escherichia coli MS 196-1	648276659	Enterobacteriaceae	Gammaproteobacteria	Enterobacterales	749548	Pseudomonadota	Escherichia	Escherichia coli	Gram-		648593862	648593863	648593864	648593861		648594102	648592417|648594440	648592416|648594439|648594441	648592415|648594442	648591896| 648589306| 648591737				648591074	648591073	648591744	648591743	648589226		648589309	648589308				648594329	648594330
Escherichia coli MS 198-1	648276660	Enterobacteriaceae	Gammaproteobacteria	Enterobacterales	749549	Pseudomonadota	Escherichia	Escherichia coli	Gram-		648525036	648525035	648525034			648520259	648522649|648525083	648522650|648525082|648525084	648522651|648525081	648522999| 648520462| 648524819| 648524791				648520660	648520661	648524783	648524784	648521577		648520459	648520460				648523104	648523105
Escherichia coli MS 200-1	648276661	Enterobacteriaceae	Gammaproteobacteria	Enterobacterales	749550	Pseudomonadota	Escherichia	Escherichia coli	Gram-							648586337				648584762| 648586427								648588334
Escherichia coli MS 21-1	648276662	Enterobacteriaceae	Gammaproteobacteria	Enterobacterales	749527	Pseudomonadota	Escherichia	Escherichia coli	Gram-		648565302	648565303	648565304			648562657	648568290|648564116	648568291|648564115|648564117	648568292|648564114	648566253| 648567243| 648566816				648562873	648562872	648566824	648566823	648567873		648567246	648567245				648563465	648563466
Escherichia coli MS 45-1	648276663	Enterobacteriaceae	Gammaproteobacteria	Enterobacterales	749528	Pseudomonadota	Escherichia	Escherichia coli	Gram-		648551151	648551152	648551153	648551150		648549983	648548780	648548781|648548779	648548778	648548469| 648549313				648547915	648547914	648549321	648549320	648550952		648548472	648548471				648552037	648552036
Escherichia coli MS 69-1	648276664	Enterobacteriaceae	Gammaproteobacteria	Enterobacterales	749531	Pseudomonadota	Escherichia	Escherichia coli	Gram-		648556621	648556622	648556623			648554349	648553343|648554498	648553342|648554499|648554497	648553341|648554496	648557365| 648553778| 648553662				648553632	648553631	648553653	648553654	648554867		648553781	648553780				648552985	648552984
Escherichia coli MS 78-1	648276665	Enterobacteriaceae	Gammaproteobacteria	Enterobacterales	749532	Pseudomonadota	Escherichia	Escherichia coli	Gram-		648572301	648572300	648572299	648572302		648568503	648570680|648568754	648570679|648568753|648568755	648570678|648568756	648570826| 648571322| 648572950				648572491	648572492	648572942	648572943	648573227		648571325	648571324				648570944	648570945
Escherichia coli MS 84-1	648276666	Enterobacteriaceae	Gammaproteobacteria	Enterobacterales	749533	Pseudomonadota	Escherichia	Escherichia coli	Gram-		648531341	648531340	648531339	648531342		648526671	648530342|648525967	648530341|648525966|648525968	648530340|648525965	648528292| 648527117| 648529016				648531005	648531004	648529023	648529022	648529953		648527120	648527119				648528407	648528408
Eubacterium yurii margaretiae ATCC 43715	648276673	Filifactoraceae	Clostridia	Peptostreptococcales	864565	Bacillota	Peptoanaerobacter	[Eubacterium] yurii	Gram+								648831643	648831644|648831646	648831645	648830072
Finegoldia magna ACS-171-V-Col3	648276674	Peptoniphilaceae	Tissierellia	Tissierellales	768713	Bacillota	Finegoldia	Finegoldia magna	Gram+
Finegoldia magna ATCC 53516	648276675	Peptoniphilaceae	Tissierellia	Tissierellales	525282	Bacillota	Finegoldia	Finegoldia magna	Gram+
Finegoldia magna BVS033A4	648276676	Peptoniphilaceae	Tissierellia	Tissierellales	866773	Bacillota	Finegoldia	Finegoldia magna	Gram+
Lactobacillus delbrueckii bulgaricus PB2003/044-T3-4	648276681	Lactobacillaceae	Bacilli	Lactobacillales	784613	Bacillota	Lactobacillus	Lactobacillus delbrueckii	Gram+							648679315
Lactobacillus jensenii JV-V16	648276683	Lactobacillaceae	Bacilli	Lactobacillales	525329	Bacillota	Lactobacillus	Lactobacillus jensenii	Gram+							648312187
Ligilactobacillus salivarius ACS-116-V-Col5a	648276684	Lactobacillaceae	Bacilli	Lactobacillales	768728	Bacillota	Ligilactobacillus	Ligilactobacillus salivarius	Gram+						648680803	648680518				648680847
Mobiluncus curtisii curtisii ATCC 35241	648276689	Actinomycetaceae	Actinomycetes	Actinomycetales	585198	Actinomycetota	Mobiluncus	Mobiluncus curtisii	Gram+																			648802791
Mobiluncus mulieris ATCC 35239	648276690	Actinomycetaceae	Actinomycetes	Actinomycetales	871571	Actinomycetota	Mobiluncus	Mobiluncus mulieris	Gram+
Mobiluncus mulieris FB024-16	648276691	Actinomycetaceae	Actinomycetes	Actinomycetales	866770	Actinomycetota	Mobiluncus	Mobiluncus mulieris	Gram+
Neisseria meningitidis sv. B ATCC 13091	648276705	Neisseriaceae	Betaproteobacteria	Neisseriales	862513	Pseudomonadota	Neisseria	Neisseria meningitidis	Gram-											648803875
Peptoniphilus duerdenii ATCC BAA-1640	648276710	Peptoniphilaceae	Tissierellia	Tissierellales	862517	Bacillota	Peptoniphilus	Peptoniphilus duerdenii	Gram+
Peptoniphilus sp. F0141	648276711	Peptoniphilaceae	Tissierellia	Tissierellales	768724	Bacillota	Peptoniphilus	Peptoniphilus sp. oral taxon 836	Gram+
Peptostreptococcus stomatis DSM 17678	648276712	Peptostreptococcaceae	Clostridia	Peptostreptococcales	596315	Bacillota	Peptostreptococcus	Peptostreptococcus stomatis	Gram+																												648433792	648433793
Prevotella amnii CRIS 21A-A	648276713	Prevotellaceae	Bacteroidia	Bacteroidales	679191	Bacteroidota	Prevotella	Prevotella amnii	Gram-
Prevotella disiens FB035-09AN	648276715	Prevotellaceae	Bacteroidia	Bacteroidales	866771	Bacteroidota	Prevotella	Prevotella disiens	Gram-							648777479
Hoylesella marshii DSM 16973	648276716	Prevotellaceae	Bacteroidia	Bacteroidales	862515	Bacteroidota	Hoylesella	Hoylesella marshii	Gram-
Selenomonas sp. oral taxon 149 67H29BP	648276723	Selenomonadaceae	Negativicutes	Selenomonadales	864563	Bacillota	Selenomonas	Selenomonas sp. oral taxon 149	Gram+
Staphylococcus aureus aureus ATCC BAA-39	648276730	Staphylococcaceae	Bacilli	Bacillales	862516	Bacillota	Staphylococcus	Staphylococcus aureus	Gram+						648813073					648813269| 648814453| 648812806								648815202
Staphylococcus aureus aureus MN8	648276731	Staphylococcaceae	Bacilli	Bacillales	548470	Bacillota	Staphylococcus	Staphylococcus aureus	Gram+		648316466	648316467	648316468	648316465	648316079		648316071	648316074|648316072	648316073	648315909| 648317825| 648316342								648317149	648316658	648315912	648315911						648316965	648316964
Streptococcus equinus ATCC 700338	648276732	Streptococcaceae	Bacilli	Lactobacillales	864569	Bacillota	Streptococcus	Streptococcus equinus	Gram+						648816908
Streptococcus gallolyticus gallolyticus TX20005	648276733	Streptococcaceae	Bacilli	Lactobacillales	545774	Bacillota	Streptococcus	Streptococcus gallolyticus	Gram+						648819171
Streptococcus mitis ATCC 6249	648276734	Streptococcaceae	Bacilli	Lactobacillales	864567	Bacillota	Streptococcus	Streptococcus mitis	Gram+						648821423
Streptococcus pyogenes ATCC 10782	648276747	Streptococcaceae	Bacilli	Lactobacillales	864568	Bacillota	Streptococcus	Streptococcus pyogenes	Gram+							648822193
Streptococcus sp. oral taxon 071 73H25AP	648276748	Streptococcaceae	Bacilli	Lactobacillales	864570	Bacillota	Streptococcus	Streptococcus sp. oral taxon 071	Gram+						648823512
Veillonella atypica ACS-049-V-Sch6	648276753	Veillonellaceae	Negativicutes	Veillonellales	866776	Bacillota	Veillonella	Veillonella atypica	Gram-
Veillonella atypica ACS-134-V-Col7a	648276754	Veillonellaceae	Negativicutes	Veillonellales	866778	Bacillota	Veillonella	Veillonella atypica	Gram-
Bacteroides sp. 1_1_14	648861000	Bacteroidaceae	Bacteroidia	Bacteroidales	469585	Bacteroidota	Bacteroides	Bacteroides sp. 1_1_14	Gram-
Parabacteroides sp. 20_3	648861001	Tannerellaceae	Bacteroidia	Bacteroidales	469591	Bacteroidota	Parabacteroides	Parabacteroides sp. 20_3	Gram-		648911445	648911446	648911447				648908863	648908864	648908865
Bacteroides sp. 3_1_19	648861002	Bacteroidaceae	Bacteroidia	Bacteroidales	469592	Bacteroidota	Bacteroides	Bacteroides sp. 3_1_19	Gram-
Bacteroides sp. 3_1_23	648861003	Bacteroidaceae	Bacteroidia	Bacteroidales	457390	Bacteroidota	Bacteroides	Bacteroides sp. 3_1_23	Gram-		648905569	648911445	648905571				648907261	648907260	648907259
Bacteroides sp. D22	648861004	Bacteroidaceae	Bacteroidia	Bacteroidales	585544	Bacteroidota	Bacteroides	Bacteroides sp. D22	Gram-
Bacteroidetes oral taxon 274 F0058	648861005	unclassified	unclassified	unclassified	575590	Bacteroidota	unclassified	Bacteroidetes oral taxon 274
Burkholderiales bacterium 1_1_47	648861006	unclassified	Betaproteobacteria	Burkholderiales	469610	Pseudomonadota	unclassified	Burkholderiales bacterium 1_1_47	Gram-											648924858
Neisseria sp. F0314	648861010	Neisseriaceae	Betaproteobacteria	Neisseriales	641149	Pseudomonadota	Neisseria	Neisseria sp. oral taxon 014	Gram-											648913017								648914683	648913527
Peptoniphilus sp. F0131	648861011	Peptoniphilaceae	Tissierellia	Tissierellales	575609	Bacillota	Peptoniphilus	Peptoniphilus sp. oral taxon 386	Gram+											648915763
Prevotella oris C735	648861012	Prevotellaceae	Bacteroidia	Bacteroidales	563008	Bacteroidota	Segatella	Segatella oris	Gram-
Rothia dentocariosa M567	648861015	Micrococcaceae	Actinomycetes	Micrococcales	563032	Actinomycetota	Rothia	Rothia dentocariosa	Gram+						648919010					648919111
Bifidobacterium longum infantis 157F-NC	649633017	Bifidobacteriaceae	Actinomycetes	Bifidobacteriales	565040	Actinomycetota	Bifidobacterium	Bifidobacterium longum	Gram+							649941420| 649939574												649941003
Bifidobacterium longum longum JCM 1217	649633019	Bifidobacteriaceae	Actinomycetes	Bifidobacteriales	565042	Actinomycetota	Bifidobacterium	Bifidobacterium longum	Gram+							649953248| 649951463												649952852
Gardnerella vaginalis 317, ATCC 14019	649633046	Bifidobacteriaceae	Actinomycetes	Bifidobacteriales	525284	Actinomycetota	Gardnerella	Gardnerella vaginalis	Gram+							649720110
Rothia dentocariosa ATCC 17931	649633093	Micrococcaceae	Actinomycetes	Micrococcales	762948	Actinomycetota	Rothia	Rothia dentocariosa	Gram+						649719341					649719451									649717948
Actinobacillus ureae ATCC 25976	649989900	Pasteurellaceae	Gammaproteobacteria	Pasteurellales	887324	Pseudomonadota	Actinobacillus	Actinobacillus ureae	Gram-											650339724| 650339013
Actinomyces sp. oral taxon 171 F0337	649989902	Actinomycetaceae	Actinomycetes	Actinomycetales	706439	Actinomycetota	Actinomyces	Actinomyces sp. oral taxon 171	Gram+						650192144		650195041	650195042	650195043	650192372| 650192618								650194645
Actinomyces sp. oral taxon 178 F0338	649989903	Actinomycetaceae	Actinomycetes	Actinomycetales	888051	Actinomycetota	Actinomyces	Actinomyces sp. oral taxon 178	Gram+						650326851
Actinomyces sp. oral taxon 180 F0310	649989904	Actinomycetaceae	Actinomycetes	Actinomycetales	888052	Actinomycetota	Actinomyces	Actinomyces sp. oral taxon 180	Gram+						650295160
Aggregatibacter segnis ATCC 33393	649989906	Pasteurellaceae	Gammaproteobacteria	Pasteurellales	888057	Pseudomonadota	Aggregatibacter	Aggregatibacter segnis	Gram-																				650297641
Anaerostipes caccae 3_2_56FAA	649989907	Lachnospiraceae	Clostridia	Lachnospirales	105841	Bacillota	Anaerostipes	Anaerostipes caccae	Gram+																				650026691
Aliarcobacter butzleri JV22	649989908	Arcobacteraceae	Epsilonproteobacteria	Campylobacterales	888827	Campylobacterota	Aliarcobacter	Aliarcobacter butzleri	Gram-											650301214
Bacillus sp. 2_A_57_CT2	649989909	Bacillaceae	Bacilli	Bacillales	665959	Bacillota	Bacillus	Bacillus sp. 2_A_57_CT2	Gram+											650038991| 650035006| 650039110| 650038743| 650037803| 650037733												650040182	650040181	650040180			650034548	650034547
Bacillus sp. BT1B_CT2	649989910	Bacillaceae	Bacilli	Bacillales	665958	Bacillota	Bacillus	Bacillus sp. BT1B_CT2	Gram+						650034014					650032665
Bacteroides eggerthii 1_2_48FAA	649989912	Bacteroidaceae	Bacteroidia	Bacteroidales	665953	Bacteroidota	Bacteroides	Bacteroides eggerthii	Gram-		650043792	650043791	650043790
Bacteroides sp. 3_1_40A	649989913	Bacteroidaceae	Bacteroidia	Bacteroidales	469593	Bacteroidota	Bacteroides	Bacteroides sp. 3_1_40A	Gram-
Bacteroides sp. 4_1_36	649989914	Bacteroidaceae	Bacteroidia	Bacteroidales	457393	Bacteroidota	Bacteroides	Bacteroides sp. 4_1_36	Gram-
Bifidobacterium dentium JCVIHMP022	649989915	Bifidobacteriaceae	Actinomycetes	Bifidobacteriales	553191	Actinomycetota	Bifidobacterium	Bifidobacterium dentium	Gram+							650209156
Bifidobacterium longum 12_1_47BFAA	649989916	Bifidobacteriaceae	Actinomycetes	Bifidobacteriales	216816	Actinomycetota	Bifidobacterium	Bifidobacterium longum	Gram+							650055173| 650054666												650053686
Campylobacter upsaliensis JV21	649989919	Campylobacteraceae	Epsilonproteobacteria	Campylobacterales	888826	Campylobacterota	Campylobacter	Campylobacter upsaliensis	Gram-																			650303134	650302999
Capnocytophaga ochracea F0287	649989920	Flavobacteriaceae	Flavobacteriia	Flavobacteriales	873517	Bacteroidota	Capnocytophaga	Capnocytophaga ochracea	Gram-																												650280191	650280192
Clostridium sp. HGF2	649989921	Clostridiaceae	Clostridia	Eubacteriales	908340	Bacillota	Clostridium	Clostridium sp. HGF2	Gram+		650270897	650270896	650270895		650273965																						650273184	650273183
Lachnoclostridium symbiosum WAL-14163	649989922	Lachnospiraceae	Clostridia	Lachnospirales	742740	Bacillota	Otoolea	[Clostridium] symbiosum	Gram+											650076135| 650076633| 650080435| 650076636| 650077445
Lachnoclostridium symbiosum WAL-14673	649989923	Lachnospiraceae	Clostridia	Lachnospirales	742741	Bacillota	Otoolea	[Clostridium] symbiosum	Gram+											650081320| 650080770| 650080772| 650083600| 650082188
Coprobacillus cateniformis 29_1	649989924	Coprobacillaceae	Erysipelotrichia	Erysipelotrichales	100884	Bacillota	Coprobacillus	Coprobacillus cateniformis	Gram+		650074081	650074082	650074083							650073419																	650074068	650074067
Dermacoccus sp. Ellin185	649989926	Dermacoccaceae	Actinomycetes	Micrococcales	188626	Actinomycetota	Dermacoccus	Dermacoccus sp. Ellin185	Gram+		650226077	650226076	650226076	650226078		650228003	650226840	650226841|650226839	650226842	650226892| 650226872								650226735| 650227630| 650227123| 650225776		650226893	650226894				650225831	650225832
Dialister microaerophilus UPII-345-E	649989928	Veillonellaceae	Negativicutes	Veillonellales	910314	Bacillota	Dialister	Dialister micraerophilus	Gram+																				650265010
Eggerthella sp. 1_3_56FAA	649989930	Eggerthellaceae	Coriobacteriia	Eggerthellales	665943	Actinomycetota	Eggerthella	Eggerthella sp. 1_3_56FAA	Gram+		650045424	650045423	650045422							650044956								650046121| 650045933| 650044957									650045867	650045868
Enterococcus faecalis DAPTO 512	649989932	Enterococcaceae	Bacilli	Lactobacillales	749489	Bacillota	Enterococcus	Enterococcus faecalis	Gram+						650159711	650159698	650159706	650159709|650159707	650159708																		650158647	650158648
Enterococcus faecalis DAPTO 516	649989933	Enterococcaceae	Bacilli	Lactobacillales	749490	Bacillota	Enterococcus	Enterococcus faecalis	Gram+						650157474	650157485
Enterococcus faecalis TX0102	649989934	Enterococcaceae	Bacilli	Lactobacillales	749501	Bacillota	Enterococcus	Enterococcus faecalis	Gram+						650151138	650151128	650151133	650151134|650151136	650151135																		650151318	650151319
Enterococcus faecalis TX0470	649989935	Enterococcaceae	Bacilli	Lactobacillales	749507	Bacillota	Enterococcus	Enterococcus faecalis	Gram+						650170074	650170063	650170069	650170070|650170072	650170071																		650168765	650168766
Enterococcus faecalis TX0635	649989936	Enterococcaceae	Bacilli	Lactobacillales	749509	Bacillota	Enterococcus	Enterococcus faecalis	Gram+						650166550	650166562	650166555	650166554|650166552	650166553																		650166439	650166438
Enterococcus faecium TX0082	649989937	Enterococcaceae	Bacilli	Lactobacillales	749520	Bacillota	Enterococcus	Enterococcus faecium	Gram+						650162258	650163128	650162267	650162266|650162264	650162265																		650162835	650162834
Enterococcus faecium TX0133A	649989938	Enterococcaceae	Bacilli	Lactobacillales	749521	Bacillota	Enterococcus	Enterococcus faecium	Gram+						650171584	650172194
Enterococcus faecium TX0133B	649989939	Enterococcaceae	Bacilli	Lactobacillales	749524	Bacillota	Enterococcus	Enterococcus faecium	Gram+						650174087	650176895	650174078	650174079|650174081	650174080																		650174271	650174272
Enterococcus faecium TX0133C	649989940	Enterococcaceae	Bacilli	Lactobacillales	749525	Bacillota	Enterococcus	Enterococcus faecium	Gram+						650154597	650154734	650154588	650154591|650154589	650154590																		650153109	650153110
Enterococcus faecium TX0133a01	649989941	Enterococcaceae	Bacilli	Lactobacillales	749522	Bacillota	Enterococcus	Enterococcus faecium	Gram+						650177118	650178674
Enterococcus faecium TX0133a04	649989942	Enterococcaceae	Bacilli	Lactobacillales	749523	Bacillota	Enterococcus	Enterococcus faecium	Gram+						650147567	650147484	650147979|650147576	650147575|650147573	650147574																		650146723	650146722
Enterococcus italicus DSM 15952	649989943	Enterococcaceae	Bacilli	Lactobacillales	888064	Bacillota	Enterococcus	Enterococcus italicus	Gram+	Halotolerant					650305186	650303896	650304623	650304620|650304622	650304621
Eremococcus coleocola ACS-139-V-Col8	649989944	Aerococcaceae	Bacilli	Lactobacillales	908337	Bacillota	Eremococcus	Eremococcus coleocola	Gram+
Erysipelotrichaceae bacterium sp. 3_1_53	649989945	Erysipelotrichaceae	Erysipelotrichia	Erysipelotrichales	658659	Bacillota	unclassified	Erysipelotrichaceae bacterium 3_1_53	Gram+		650014520	650014519	650014518		650014263																						650014430	650014431
Escherichia coli MS 145-7	649989948	Enterobacteriaceae	Gammaproteobacteria	Enterobacterales	679204	Pseudomonadota	Escherichia	Escherichia coli	Gram-		650117950	650117951	650117952	650117949		650118215	650117638|650115467	650117639|650115466|650115468	650117640|650115469	650116662| 650119202| 650118548				650117112	650117113	650118557	650118556	650119414		650119205	650119204				650118520	650118519
Lachnoanaerobaculum saburreum DSM 3986	649989950	Lachnospiraceae	Clostridia	Lachnospirales	887325	Bacillota	Lachnoanaerobaculum	Lachnoanaerobaculum saburreum	Gram+											650307011
Faecalibacterium cf. prausnitzii KLE1255	649989951	Oscillospiraceae	Clostridia	Eubacteriales	748224	Bacillota	Faecalibacterium	Faecalibacterium prausnitzii	Gram+
Gemella moribillum M424	649989952	Gemellaceae	Bacilli	Bacillales	562982	Bacillota	Gemella	Gemella morbillorum	Gram+							650007413																					650006876	650006875
Kingella denitrificans ATCC 33394	649989956	Neisseriaceae	Betaproteobacteria	Neisseriales	888741	Pseudomonadota	Kingella	Kingella denitrificans	Gram-																												650370667	650370665
Lachnospiraceae bacterium sp. 5_1_63FAA	649989957	Lachnospiraceae	Clostridia	Lachnospirales	658089	Bacillota	unclassified	Lachnospiraceae bacterium 5_1_63FAA	Gram+											650018095									650017635
Lachnospiraceae bacterium sp. 8_1_57FAA	649989958	Lachnospiraceae	Clostridia	Lachnospirales	665951	Bacillota	unclassified	Lachnospiraceae bacterium 8_1_57FAA	Gram+		650048917	650048919	650048920	650048918															650049718
Lactobacillus iners ATCC 55195	649989959	Lactobacillaceae	Bacilli	Lactobacillales	888801	Bacillota	Lactobacillus	Lactobacillus iners	Gram+							650309632
Lactobacillus iners LEAF 2052A-d	649989960	Lactobacillaceae	Bacilli	Lactobacillales	879302	Bacillota	Lactobacillus	Lactobacillus iners	Gram+							650241397
Lactobacillus iners LEAF 2053A-b	649989961	Lactobacillaceae	Bacilli	Lactobacillales	879301	Bacillota	Lactobacillus	Lactobacillus iners	Gram+							650239216
Lactobacillus iners LEAF 2062A-h1	649989962	Lactobacillaceae	Bacilli	Lactobacillales	879303	Bacillota	Lactobacillus	Lactobacillus iners	Gram+							650242232
Lactobacillus iners LEAF 3008A-a	649989963	Lactobacillaceae	Bacilli	Lactobacillales	879304	Bacillota	Lactobacillus	Lactobacillus iners	Gram+							650243773
Lactobacillus iners LactinV 01V1-a	649989964	Lactobacillaceae	Bacilli	Lactobacillales	879297	Bacillota	Lactobacillus	Lactobacillus iners	Gram+							650216878
Lactobacillus iners LactinV 03V1-b	649989965	Lactobacillaceae	Bacilli	Lactobacillales	879298	Bacillota	Lactobacillus	Lactobacillus iners	Gram+							650215149
Lactobacillus iners LactinV 09V1-c	649989966	Lactobacillaceae	Bacilli	Lactobacillales	879299	Bacillota	Lactobacillus	Lactobacillus iners	Gram+							650212849
Lactobacillus iners LactinV 11V1-d	649989967	Lactobacillaceae	Bacilli	Lactobacillales	879300	Bacillota	Lactobacillus	Lactobacillus iners	Gram+							650211855
Lactobacillus iners SPIN 2503V10-D	649989968	Lactobacillaceae	Bacilli	Lactobacillales	879296	Bacillota	Lactobacillus	Lactobacillus iners	Gram+							650217723
Limosilactobacillus oris PB013-T2-3	649989969	Lactobacillaceae	Bacilli	Lactobacillales	908339	Bacillota	Limosilactobacillus	Limosilactobacillus oris	Gram+						650244184
Lautropia mirabilis ATCC 51599	649989970	Burkholderiaceae	Betaproteobacteria	Burkholderiales	887898	Pseudomonadota	Lautropia	Lautropia mirabilis	Gram-											650323886| 650324102
Megasphaera micronuciformis F0359	649989971	Veillonellaceae	Negativicutes	Veillonellales	706434	Bacillota	Megasphaera	Megasphaera micronuciformis	Gram-																												650183193	650183192
Mobiluncus curtisii ATCC 51333	649989973	Actinomycetaceae	Actinomycetes	Actinomycetales	887326	Actinomycetota	Mobiluncus	Mobiluncus curtisii	Gram+																			650311567
Mobiluncus curtisii holmesii ATCC 35242	649989974	Actinomycetaceae	Actinomycetes	Actinomycetales	887899	Actinomycetota	Mobiluncus	Mobiluncus holmesii	Gram+																			650312029	650312507
Neisseria mucosa C102	649989976	Neisseriaceae	Betaproteobacteria	Neisseriales	435832	Pseudomonadota	Neisseria	Neisseria mucosa	Gram-																												649999990	649999989
Parascardovia denticolens DSM 10105	649989980	Bifidobacteriaceae	Actinomycetes	Bifidobacteriales	864564	Actinomycetota	Parascardovia	Parascardovia denticolens	Gram+							650284020																					650282626	650282625
Pediococcus acidilactici DSM 20284	649989981	Lactobacillaceae	Bacilli	Lactobacillales	862514	Bacillota	Pediococcus	Pediococcus acidilactici	Gram+						650198995					650198381
Peptoniphilus harei ACS-146-V-Sch2b	649989982	Peptoniphilaceae	Tissierellia	Tissierellales	908338	Bacillota	Peptoniphilus	Peptoniphilus harei	Gram+								650260929	650260928|650260926	650260927
Phascolarctobacterium succinatutens YIT 12067	649989983	Acidaminococcaceae	Negativicutes	Acidaminococcales	626939	Bacillota	Phascolarctobacterium	Phascolarctobacterium succinatutens	Gram-
Porphyromonas asaccharolytica PR426713P-I	649989985	Porphyromonadaceae	Bacteroidia	Bacteroidales	910312	Bacteroidota	Porphyromonas	Porphyromonas asaccharolytica	Gram-
Prevotella buccae ATCC 33574	649989986	Prevotellaceae	Bacteroidia	Bacteroidales	873513	Bacteroidota	Segatella	Segatella buccae	Gram-
Prevotella multiformis DSM 16608	649989987	Prevotellaceae	Bacteroidia	Bacteroidales	888743	Bacteroidota	Prevotella	Prevotella multiformis	Gram-
Hoylesella oralis ATCC 33269	649989988	Prevotellaceae	Bacteroidia	Bacteroidales	873533	Bacteroidota	Hoylesella	Hoylesella oralis	Gram-
Prevotella salivae DSM 15606	649989989	Prevotellaceae	Bacteroidia	Bacteroidales	888832	Bacteroidota	Segatella	Segatella salivae	Gram-							650318782
Pseudoramibacter alactolyticus ATCC 23263	649989993	Eubacteriaceae	Clostridia	Eubacteriales	887929	Bacillota	Pseudoramibacter	Pseudoramibacter alactolyticus	Gram+											650318156| 650316242
Ralstonia pickettii 5_7_47FAA	649989994	Burkholderiaceae	Betaproteobacteria	Burkholderiales	329	Pseudomonadota	Ralstonia	Ralstonia pickettii	Gram-						650020243	650022502| 650018647												650022334| 650021922
Selenomonas artemidis F0399	649989996	Selenomonadaceae	Negativicutes	Selenomonadales	749551	Bacillota	Selenomonas	Selenomonas artemidis	Gram+																				650190960
Selenomonas sp. oral taxon 137 F0430	649989997	Selenomonadaceae	Negativicutes	Selenomonadales	879310	Bacillota	Selenomonas	Selenomonas sp. oral taxon 137	Gram+																				650267976
Solobacterium moorei F0204	649989999	Erysipelotrichaceae	Erysipelotrichia	Erysipelotrichales	706433	Bacillota	Solobacterium	Solobacterium moorei	Gram+											650182052
Staphylococcus lugdunensis M23590	649990000	Staphylococcaceae	Bacilli	Bacillales	525377	Bacillota	Staphylococcus	Staphylococcus lugdunensis	Gram+		650315730	650315729	650315728		650315260		650315278	650315277|650315275	650315276	650315456| 650315550| 650314193								650314907	650315975	650315453	650315454						650314759	650314758
Streptococcus anginosus 1_2_62CV	649990001	Streptococcaceae	Bacilli	Lactobacillales	742820	Bacillota	Streptococcus	Streptococcus anginosus	Gram+						650086133																	650085592	650085593	650085591			650085101	650085100
Streptococcus anginosus F0211	649990002	Streptococcaceae	Bacilli	Lactobacillales	706437	Bacillota	Streptococcus	Streptococcus anginosus	Gram+						650184199																	650184297	650184298	650184295			650186109	650186110
Streptococcus australis ATCC 700641	649990003	Streptococcaceae	Bacilli	Lactobacillales	888833	Bacillota	Streptococcus	Streptococcus australis	Gram+											650325655
Streptococcus cristatus ATCC 51100	649990004	Streptococcaceae	Bacilli	Lactobacillales	889201	Bacillota	Streptococcus	Streptococcus cristatus	Gram+						650332149
Streptococcus downei F0415	649990005	Streptococcaceae	Bacilli	Lactobacillales	904293	Bacillota	Streptococcus	Streptococcus downei	Gram+						650248357		650249005	650249006|650249008	650249007
Streptococcus equinus ATCC 9812	649990006	Streptococcaceae	Bacilli	Lactobacillales	525379	Bacillota	Streptococcus	Streptococcus equinus	Gram+						650330209
Streptococcus infantis ATCC 700779	649990007	Streptococcaceae	Bacilli	Lactobacillales	889204	Bacillota	Streptococcus	Streptococcus infantis	Gram+						650333088																						650334370	650334369
Streptococcus parasanguinis ATCC 903	649990009	Streptococcaceae	Bacilli	Lactobacillales	888048	Bacillota	Streptococcus	Streptococcus parasanguinis	Gram+						650336127
Streptococcus parasanguinis F0405	649990010	Streptococcaceae	Bacilli	Lactobacillales	905067	Bacillota	Streptococcus	Streptococcus parasanguinis	Gram+						650248142																	650246365	650246364	650246366			650247802	650247803
Streptococcus peroris ATCC 700780	649990011	Streptococcaceae	Bacilli	Lactobacillales	888746	Bacillota	Streptococcus	Streptococcus peroris	Gram+						650337269																						650338364	650338363
Streptococcus pseudoporcinus SPIN 20026	649990013	Streptococcaceae	Bacilli	Lactobacillales	910313	Bacillota	Streptococcus	Streptococcus pseudoporcinus	Gram+		650263341	650263340	650263339	650263342		650263930	650264382	650264379|650264381	650264380																		650262524	650262523
Streptococcus oralis ATCC 49296	649990014	Streptococcaceae	Bacilli	Lactobacillales	888049	Bacillota	Streptococcus	Streptococcus oralis	Gram+						650293079
Streptococcus sanguinis VMC66	649990015	Streptococcaceae	Bacilli	Lactobacillales	888825	Bacillota	Streptococcus	Streptococcus sanguinis	Gram+																							650342693	650342694	650342692			650342773	650342772
Streptococcus vestibularis ATCC 49124	649990016	Streptococcaceae	Bacilli	Lactobacillales	889206	Bacillota	Streptococcus	Streptococcus vestibularis	Gram+						650344109
Streptococcus vestibularis F0396	649990017	Streptococcaceae	Bacilli	Lactobacillales	904306	Bacillota	Streptococcus	Streptococcus vestibularis	Gram+						650251620
Succinatimonas hippei YIT 12066	649990019	Succinivibrionaceae	Gammaproteobacteria	Aeromonadales	762983	Pseudomonadota	Succinatimonas	Succinatimonas hippei	Gram-
Sutterella wadsworthensis 3_1_45B	649990021	Sutterellaceae	Betaproteobacteria	Burkholderiales	742821	Pseudomonadota	Sutterella	Sutterella wadsworthensis	Gram-																			650086965
Treponema phagedenis F0421	649990026	Treponemataceae	Spirochaetia	Spirochaetales	754027	Spirochaetota	Treponema	Treponema phagedenis	Gram-											650207575
Veillonella sp. oral taxon 158 F0412	649990027	Veillonellaceae	Negativicutes	Veillonellales	879309	Bacillota	Veillonella	Veillonella sp. oral taxon 158	Gram-
Alistipes shahii WAL 8301	650377904	Rikenellaceae	Bacteroidia	Bacteroidales	717959	Bacteroidota	Alistipes	Alistipes shahii	Gram-		650521091	650521092	650521093	650521090
Bacteroides xylanisolvens XB1A	650377911	Bacteroidaceae	Bacteroidia	Bacteroidales	657309	Bacteroidota	Bacteroides	Bacteroides xylanisolvens	Gram-		650524005	650524006	650524007				650524468	650524467	650524466
Bifidobacterium longum longum F8	650377912	Bifidobacteriaceae	Actinomycetes	Bifidobacteriales	722911	Actinomycetota	Bifidobacterium	Bifidobacterium longum	Gram+							650528177												650527789
Butyrivibrio fibrisolvens 16/4	650377919	Lachnospiraceae	Clostridia	Lachnospirales	657324	Bacillota	Butyrivibrio	Butyrivibrio fibrisolvens	Gram+
Lacrimispora saccharolytica K10	650377923	Lachnospiraceae	Clostridia	Lachnospirales	717608	Bacillota	Lacrimispora	Lacrimispora saccharolytica	Gram+											650535369
Coprococcus catus GD/7	650377925	Lachnospiraceae	Clostridia	Lachnospirales	717962	Bacillota	Coprococcus	Coprococcus catus	Gram+											650535860
Enterobacter hormaechei NCTC 9394	650377928	Enterobacteriaceae	Gammaproteobacteria	Enterobacterales	158836	Pseudomonadota	Enterobacter	Enterobacter hormaechei	Gram-							650541077	650543001|650541680	650543002|650541679|650541677	650543003|650541678							650544323	650544322	650544299| 650541177| 650544091
Enterococcus faecalis 7L76	650377930	Enterococcaceae	Bacilli	Lactobacillales	1351	Bacillota	Enterococcus	Enterococcus faecalis	Gram+						650588249																						650588420	650588419
Faecalitalea cylindroides T2-87	650377935	Erysipelotrichaceae	Erysipelotrichia	Erysipelotrichales	717960	Bacillota	Faecalitalea	Faecalitalea cylindroides	Gram+
Eubacterium rectale DSM 17629	650377936	Lachnospiraceae	Clostridia	Lachnospirales	657318	Bacillota	Agathobacter	Agathobacter rectalis	Gram+
Eubacterium rectale M104/1	650377937	Lachnospiraceae	Clostridia	Lachnospirales	657317	Bacillota	Agathobacter	Agathobacter rectalis	Gram+
Eubacterium siraeum 70/3	650377938	Oscillospiraceae	Clostridia	Eubacteriales	657319	Bacillota	unclassified	[Eubacterium] siraeum	Gram+																				650552856
Faecalibacterium prausnitzii SL3/3	650377940	Oscillospiraceae	Clostridia	Eubacteriales	657322	Bacillota	Faecalibacterium	Faecalibacterium prausnitzii	Gram+
Faecalibacterium prausnitzii L2-6	650377941	Oscillospiraceae	Clostridia	Eubacteriales	718252	Bacillota	Faecalibacterium	Faecalibacterium prausnitzii	Gram+
Gordonibacter pamelaeae 7-10-1-bT, DSM 19378	650377943	Eggerthellaceae	Coriobacteriia	Eggerthellales	657308	Actinomycetota	Gordonibacter	Gordonibacter pamelaeae	Gram+						650562142													650561752
Megamonas hypermegale ART12/1	650377958	Selenomonadaceae	Negativicutes	Selenomonadales	657316	Bacillota	Megamonas	Megamonas hypermegale	Gram+																				650562508
Roseburia intestinalis M50/1	650377964	Lachnospiraceae	Clostridia	Lachnospirales	657315	Bacillota	Roseburia	Roseburia intestinalis	Gram+											650565111
Roseburia intestinalis XB6B4	650377965	Lachnospiraceae	Clostridia	Lachnospirales	718255	Bacillota	Roseburia	Roseburia intestinalis	Gram+
Ruminococcus bromii L2-63	650377966	Oscillospiraceae	Clostridia	Eubacteriales	657321	Bacillota	Ruminococcus	Ruminococcus bromii	Gram+																				650572619
Blautia obeum A2-162	650377967	Lachnospiraceae	Clostridia	Lachnospirales	657314	Bacillota	Blautia	Blautia obeum	Gram+
Ruminococcus sp. SR1/5	650377968	Oscillospiraceae	Clostridia	Eubacteriales	657323	Bacillota	Ruminococcus	Ruminococcus sp. SR1/5	Gram+																				650576384
Ruminococcus sp. 18P13	650377969	Oscillospiraceae	Clostridia	Eubacteriales	213810	Bacillota	Ruminococcus	Ruminococcus champanellensis	Gram+
Ruminococcus torques L2-14	650377970	Lachnospiraceae	Clostridia	Lachnospirales	657313	Bacillota	Mediterraneibacter	[Ruminococcus] torques	Gram+											650583710
Fretibacterium fastidiosum SGP1	650377983	Aminobacteriaceae	Synergistia	Synergistales	651822	Synergistota	Fretibacterium	Fretibacterium fastidiosum	Gram-											650586556| 650586371| 650586294
Clostridiales bacterium SS3/4	650377989	unclassified	Clostridia	Eubacteriales	245014	Bacillota	unclassified	butyrate-producing bacterium SS3/4	Gram+											650597353
Anaerostipes hadrus SSC/2	650377990	Lachnospiraceae	Clostridia	Lachnospirales	649756	Bacillota	Anaerostipes	Anaerostipes hadrus	Gram+
Aerococcus urinae ACS-120-V-Col10a	650716005	Aerococcaceae	Bacilli	Lactobacillales	866775	Bacillota	Aerococcus	Aerococcus urinae	Gram+								650765026	650765029|650765027	650765028																		650764563	650764562
Limosilactobacillus reuteri SD2112	650716048	Lactobacillaceae	Bacilli	Lactobacillales	491077	Bacillota	Limosilactobacillus	Limosilactobacillus reuteri	Gram+						650965585
Prevotella denticola F0289	650716073	Prevotellaceae	Bacteroidia	Bacteroidales	767031	Bacteroidota	Prevotella	Prevotella denticola	Gram-
Streptococcus parasanguinis ATCC 15912	650716089	Streptococcaceae	Bacilli	Lactobacillales	760570	Bacillota	Streptococcus	Streptococcus parasanguinis	Gram+						650940971
Bifidobacterium breve ACS-071-V-Sch8b	651053005	Bifidobacteriaceae	Actinomycetes	Bifidobacteriales	866777	Actinomycetota	Bifidobacterium	Bifidobacterium breve	Gram+							651201736
Bifidobacterium longum infantis JCM 1222	651053007	Bifidobacteriaceae	Actinomycetes	Bifidobacteriales	391904	Actinomycetota	Bifidobacterium	Bifidobacterium longum	Gram+							651055530													651053060
Gardnerella vaginalis HMP9231	651053027	Bifidobacteriaceae	Actinomycetes	Bifidobacteriales	1009464	Actinomycetota	Gardnerella	Gardnerella vaginalis	Gram+							651194271
Helicobacter pylori 83	651053031	Helicobacteraceae	Epsilonproteobacteria	Campylobacterales	585538	Campylobacterota	Helicobacter	Helicobacter pylori	Gram-																			651160047
Staphylococcus aureus aureus TCH60	651053070	Staphylococcaceae	Bacilli	Bacillales	548473	Bacillota	Staphylococcus	Staphylococcus aureus	Gram+		651108255	651108256	651108257	651108254	651107874		651107866	651107867|651107869	651107868	651107702| 651109045| 651108132								651109804		651107705	651107704						651109654	651109653
Clostridium sp. D5	651285002	Clostridiaceae	Clostridia	Eubacteriales	556261	Bacillota	Clostridium	Clostridium sp. D5	Gram+		651314015	651314014	651314013							651312485| 651314262| 651314194
Lactobacillus crispatus CTV-05	651285003	Lactobacillaceae	Bacilli	Lactobacillales	440496	Bacillota	Lactobacillus	Lactobacillus crispatus	Gram+							651295926| 651296803
Staphylococcus caprae C87	651285006	Staphylococcaceae	Bacilli	Bacillales	435838	Bacillota	Staphylococcus	Staphylococcus capitis	Gram+		651302443	651302442	651302441		651302045| 651302046		651302058|651302425	651302057|651302424|651302055|651302422	651302056|651302423	651302228| 651301801| 651301031								651300306		651302225	651302226						651300535	651300536
Staphylococcus hominis hominis C80	651285007	Staphylococcaceae	Bacilli	Bacillales	435837	Bacillota	Staphylococcus	Staphylococcus hominis	Gram+						651298477					651298329| 651298200| 651298705| 651299369| 651298012
Streptococcus sp. C150	651285008	Streptococcaceae	Bacilli	Lactobacillales	435842	Bacillota	Streptococcus	Streptococcus sp. C150	Gram+						651306060					651305072																	651305642	651305641
Streptococcus sp. C300	651285009	Streptococcaceae	Bacilli	Lactobacillales	563036	Bacillota	Streptococcus	Streptococcus sp. C300	Gram+						651308494
Streptococcus sp. M334	651285010	Streptococcaceae	Bacilli	Lactobacillales	563038	Bacillota	Streptococcus	Streptococcus sp. M334	Gram+						651310295																	651309131	651309130	651309132			651310244	651310243
Actinomyces sp. oral taxon 170 F0386	651324005	Actinomycetaceae	Actinomycetes	Actinomycetales	762963	Actinomycetota	Actinomyces	Actinomyces sp. oral taxon 170	Gram+						651538006					651536421| 651538678
Actinomyces sp. oral taxon 448 F0400	651324006	Actinomycetaceae	Actinomycetes	Actinomycetales	888056	Actinomycetota	Actinomyces	Actinomyces sp. oral taxon 448	Gram+						651676723		651677287	651677286	651677285									651676557
Anaerococcus hydrogenalis ACS-025-V-Sch4	651324009	Peptoniphilaceae	Tissierellia	Tissierellales	879306	Bacillota	Anaerococcus	Anaerococcus hydrogenalis	Gram+
Bacteroides clarus YIT 12056	651324010	Bacteroidaceae	Bacteroidia	Bacteroidales	762984	Bacteroidota	Bacteroides	Bacteroides clarus	Gram-
Bacteroides fluxus YIT 12057	651324011	Bacteroidaceae	Bacteroidia	Bacteroidales	763034	Bacteroidota	Bacteroides	Bacteroides fluxus	Gram-		651545065	651545064	651545063							651545834
Bacteroides ovatus 3_8_47FAA	651324012	Bacteroidaceae	Bacteroidia	Bacteroidales	665954	Bacteroidota	Bacteroides	Bacteroides ovatus	Gram-		651359885	651359886	651359887				651360502	651360501	651360500
Bacteroides sp. 1_1_30	651324013	Bacteroidaceae	Bacteroidia	Bacteroidales	457387	Bacteroidota	Bacteroides	Bacteroides sp. 1_1_30	Gram-		651369866	651369867	651369868				651373329	651373330	651373331
Bacteroides fragilis 2_1_56FAA	651324014	Bacteroidaceae	Bacteroidia	Bacteroidales	817	Bacteroidota	Bacteroides	Bacteroides fragilis	Gram-		651361666	651361667	651361668				651364929	651364928	651364927
Capnocytophaga sp. oral taxon 338 F0234	651324020	Flavobacteriaceae	Flavobacteriia	Flavobacteriales	888059	Bacteroidota	Capnocytophaga	Capnocytophaga sp. oral taxon 338	Gram-
Centipeda periodontii DSM 2778	651324021	Selenomonadaceae	Negativicutes	Selenomonadales	888060	Bacillota	Centipeda	Centipeda periodontii	Gram-																				651598071
Desmospora sp. 8437	651324024	Thermoactinomycetaceae	Bacilli	Bacillales	997346	Bacillota	Desmospora	Desmospora sp. 8437	Gram+								651609448|651609558|651609447	651609449|651609559|651609561	651609450|651609560		651607107	651607108	651607109					651607715
Dialister micraerophilus DSM 19965	651324025	Veillonellaceae	Negativicutes	Veillonellales	888062	Bacillota	Dialister	Dialister micraerophilus	Gram+
Dysgonomonas gadei ATCC BAA-286	651324026	Dysgonomonadaceae	Bacteroidia	Bacteroidales	742766	Bacteroidota	Dysgonomonas	Dysgonomonas gadei	Gram-		651386621	651386620	651386619			651387556				651387970
Dysgonomonas mossii DSM 22836	651324027	Dysgonomonadaceae	Bacteroidia	Bacteroidales	742767	Bacteroidota	Dysgonomonas	Dysgonomonas mossii	Gram-							651389546
Eggerthella sp. HGA1	651324028	Eggerthellaceae	Coriobacteriia	Eggerthellales	910311	Actinomycetota	Eggerthella	Eggerthella sp. HGA1	Gram+		651511693	651511692	651511691							651510166								651511560| 651509922| 651510165	651509578								651509349	651509350
Enterobacter hormaechei ATCC 49162	651324029	Enterobacteriaceae	Gammaproteobacteria	Enterobacterales	888063	Pseudomonadota	Enterobacter	Enterobacter hormaechei	Gram-							651598796				651599865| 651600887								651600723| 651600428| 651600668
Enterococcus casseliflavus ATCC 12755	651324030	Enterococcaceae	Bacilli	Lactobacillales	888066	Bacillota	Enterococcus	Enterococcus casseliflavus	Gram+	Halotolerant	651494112	651494113	651494114	651494111	651492333	651493166	651493703|651492313	651492316|651492314	651492315																		651494524	651494523
Fusobacterium nucleatum animalis 11_3_2	651324032	Fusobacteriaceae	Fusobacteriia	Fusobacteriales	457403	Fusobacteriota	Fusobacterium	Fusobacterium animalis	Gram-											651355579									651355887
Gemella haemolysans M341	651324034	Gemellaceae	Bacilli	Bacillales	562981	Bacillota	Gemella	Gemella haemolysans	Gram+							651325554																					651324966	651324965
Haemophilus aegyptius ATCC 11116	651324038	Pasteurellaceae	Gammaproteobacteria	Pasteurellales	888728	Pseudomonadota	Haemophilus	Haemophilus aegyptius	Gram-											651534763
Haemophilus parainfluenzae ATCC 33392	651324039	Pasteurellaceae	Gammaproteobacteria	Pasteurellales	888828	Pseudomonadota	Haemophilus	Haemophilus parainfluenzae	Gram-																				651496810
Kingella kingae ATCC 23330	651324044	Neisseriaceae	Betaproteobacteria	Neisseriales	887327	Pseudomonadota	Kingella	Kingella kingae	Gram-											651604690
Klebsiella sp. MS 92-3	651324045	Enterobacteriaceae	Gammaproteobacteria	Enterobacterales	749535	Pseudomonadota	Klebsiella	Klebsiella sp. MS 92-3	Gram-		651547119	651547120	651547121			651549046	651551568|651547197	651551569|651547198|651547196	651551570|651547199	651550640| 651550459| 651546295				651547168	651547167	651550431	651550432	651547899| 651548008		651546298	651546297				651547799	651547798
Lachnospiraceae bacterium 1_1_57FAA	651324046	Lachnospiraceae	Clostridia	Lachnospirales	658081	Bacillota	unclassified	Lachnospiraceae bacterium 1_1_57FAA	Gram+		651329552	651329551	651329550
Lachnospiraceae bacterium 1_4_56FAA	651324047	Lachnospiraceae	Clostridia	Lachnospirales	658655	Bacillota	unclassified	Lachnospiraceae bacterium 1_4_56FAA	Gram+											651332379									651333031
Lachnospiraceae bacterium 2_1_58FAA	651324049	Lachnospiraceae	Clostridia	Lachnospirales	658082	Bacillota	unclassified	Lachnospiraceae bacterium 2_1_58FAA	Gram+
Lachnospiraceae bacterium 3_1_46FAA	651324050	Lachnospiraceae	Clostridia	Lachnospirales	665950	Bacillota	unclassified	Lachnospiraceae bacterium 3_1_46FAA	Gram+
Lachnospiraceae bacterium 6_1_37FAA	651324052	Lachnospiraceae	Clostridia	Lachnospirales	658656	Bacillota	unclassified	Lachnospiraceae bacterium 6_1_37FAA	Gram+											651376336
Lachnospiraceae bacterium 5_1_57FAA	651324053	Lachnospiraceae	Clostridia	Lachnospirales	658085	Bacillota	unclassified	Lachnospiraceae bacterium 5_1_57FAA	Gram+		651346918	651346917	651346916							651346249
Lachnospiraceae bacterium 6_1_63FAA	651324054	Lachnospiraceae	Clostridia	Lachnospirales	658083	Bacillota	unclassified	Lachnospiraceae bacterium 6_1_63FAA	Gram+		651348637	651348636	651348635							651350351| 651349022
Lachnospiraceae bacterium 9_1_43BFAA	651324055	Lachnospiraceae	Clostridia	Lachnospirales	658088	Bacillota	unclassified	Lachnospiraceae bacterium 9_1_43BFAA	Gram+		651351326	651351325	651351324							651352170
Lachnospiraceae bacterium Oral Taxon 107 F0167	651324056	Lachnospiraceae	Clostridia	Lachnospirales	575593	Bacillota	unclassified	Lachnospiraceae bacterium oral taxon 500	Gram+
Lactobacillus iners SPIN 1401G	651324062	Lactobacillaceae	Bacilli	Lactobacillales	879295	Bacillota	Lactobacillus	Lactobacillus iners	Gram+							651505874
Lactobacillus iners UPII 143-D	651324063	Lactobacillaceae	Bacilli	Lactobacillales	928327	Bacillota	Lactobacillus	Lactobacillus iners	Gram+							651499021
Lactobacillus iners UPII 60-B	651324064	Lactobacillaceae	Bacilli	Lactobacillales	928328	Bacillota	Lactobacillus	Lactobacillus iners	Gram+							651499773
Megasphaera sp. UPII 199-6	651324070	Veillonellaceae	Negativicutes	Veillonellales	1000568	Bacillota	Megasphaera	Megasphaera lornae	Gram-
Neisseria bacilliformis ATCC BAA-1200	651324074	Neisseriaceae	Betaproteobacteria	Neisseriales	888742	Pseudomonadota	Neisseria	Neisseria bacilliformis	Gram-
Neisseria macacae ATCC 33926	651324075	Neisseriaceae	Betaproteobacteria	Neisseriales	997348	Pseudomonadota	Neisseria	Neisseria macacae	Gram-											651678818
Oribacterium sp. oral taxon 108 F0425	651324079	Lachnospiraceae	Clostridia	Lachnospirales	904296	Bacillota	Oribacterium	Oribacterium sp. oral taxon 108	Gram+											651617893
Paenibacillus sp. HGF5	651324080	Paenibacillaceae	Bacilli	Bacillales	908341	Bacillota	Paenibacillus	Paenibacillus sp. HGF5	Gram+						651513516					651514320
Paenibacillus sp. HGF7	651324081	Paenibacillaceae	Bacilli	Bacillales	944559	Bacillota	Paenibacillus	Paenibacillus sp. HGF7	Gram+		651570215	651570214	651570213	651570216	651569245		651567578|651570715	651567579|651570716|651570718	651567580|651570717													651571170	651571169	651571171			651570646	651570645
Paraprevotella xylaniphila YIT 11841	651324083	Prevotellaceae	Bacteroidia	Bacteroidales	762982	Bacteroidota	Paraprevotella	Paraprevotella xylaniphila	Gram-		651555307	651555306	651555305				651558451	651558452	651558453
Parasutterella excrementihominis YIT 11859	651324084	Sutterellaceae	Betaproteobacteria	Burkholderiales	762966	Pseudomonadota	Parasutterella	Parasutterella excrementihominis	Gram-
Parvimonas sp. oral taxon 110 F0139	651324085	Peptoniphilaceae	Tissierellia	Tissierellales	767100	Bacillota	Parvimonas	Parvimonas sp. oral taxon 110	Gram+
Prevotella dentalis ES 2772	651324087	Prevotellaceae	Bacteroidia	Bacteroidales	908937	Bacteroidota	Prevotella	Prevotella dentalis	Gram-
Prevotella denticola CRIS 18C-A	651324088	Prevotellaceae	Bacteroidia	Bacteroidales	944557	Bacteroidota	Prevotella	Prevotella denticola	Gram-
Prevotella nigrescens ATCC 33563	651324089	Prevotellaceae	Bacteroidia	Bacteroidales	997352	Bacteroidota	Prevotella	Prevotella nigrescens	Gram-
Prevotella pallens ATCC 700821	651324090	Prevotellaceae	Bacteroidia	Bacteroidales	997353	Bacteroidota	Prevotella	Prevotella pallens	Gram-							651672300
Propionibacterium sp. 409-HC1	651324091	Propionibacteriaceae	Actinomycetes	Propionibacteriales	936047	Actinomycetota	Propionibacterium	Propionibacterium sp. 409-HC1	Gram+		651623565	651623566	651623567	651623564	651621761	651621919	651621611	651621612	651621613									651621558
Propionibacterium sp. 434-HC2	651324092	Propionibacteriaceae	Actinomycetes	Propionibacteriales	936048	Actinomycetota	Propionibacterium	Propionibacterium sp. 434-HC2	Gram+						651624744	651625992												651626152
Psychrobacter sp. 1501	651324094	Moraxellaceae	Gammaproteobacteria	Moraxellales	1002339	Pseudomonadota	Psychrobacter	Psychrobacter sp. 1501(2011)	Gram-											651611026| 651610003| 651610933| 651610084															651611314	651611313	651609862	651609863
Streptococcus anginosus SK52	651324100	Streptococcaceae	Bacilli	Lactobacillales	1000570	Bacillota	Streptococcus	Streptococcus anginosus	Gram+						651626982
Streptococcus infantis SK1076	651324101	Streptococcaceae	Bacilli	Lactobacillales	1005705	Bacillota	Streptococcus	Streptococcus infantis	Gram+						651636603																						651635957	651635958
Streptococcus sp. oral taxon 056 F0418	651324104	Streptococcaceae	Bacilli	Lactobacillales	904294	Bacillota	Streptococcus	Streptococcus sp. oral taxon 056	Gram+						651682141
Turicibacter sp. HGF1	651324107	Turicibacteraceae	Erysipelotrichia	Erysipelotrichales	910310	Bacillota	Turicibacter	Turicibacter sp. HGF1	Gram+
Limosilactobacillus reuteri MM4-1A	2502171170	Lactobacillaceae	Bacilli	Lactobacillales	548485	Bacillota	Limosilactobacillus	Limosilactobacillus reuteri	Gram+						2502291268
Limosilactobacillus reuteri MM2-3	2502171171	Lactobacillaceae	Bacilli	Lactobacillales	585517	Bacillota	Limosilactobacillus	Limosilactobacillus reuteri	Gram+						2502292503
Limosilactobacillus reuteri CF48-3A	2502171173	Lactobacillaceae	Bacilli	Lactobacillales	525341	Bacillota	Limosilactobacillus	Limosilactobacillus reuteri	Gram+						2502298163
Bifidobacterium pseudocatenulatum D2CA	2502545009	Bifidobacteriaceae	Actinomycetes	Bifidobacteriales	718253	Actinomycetota	Bifidobacterium	Bifidobacterium pseudocatenulatum	Gram+							2502583833												2502582892
Filifactor alocis ATCC 35896	2511231077	Filifactoraceae	Clostridia	Peptostreptococcales	546269	Bacillota	Filifactor	Filifactor alocis	Gram+
Helicobacter pylori 35A	2511231168	Helicobacteraceae	Epsilonproteobacteria	Campylobacterales	585535	Campylobacterota	Helicobacter	Helicobacter pylori	Gram-																			2511867444
Actinomyces sp. F0384	2512047052	Actinomycetaceae	Actinomycetes	Actinomycetales	944560	Actinomycetota	Actinomyces	Actinomyces sp. oral taxon 175	Gram+						2512412710		2512414030	2512414029	2512414028	2512413123| 2512413370								2512412884
Alistipes sp. HGB5	2512047053	Rikenellaceae	Bacteroidia	Bacteroidales	908612	Bacteroidota	Alistipes	Alistipes sp. HGB5	Gram-
Haemophilus pittmaniae HK 85	2512047060	Pasteurellaceae	Gammaproteobacteria	Pasteurellales	1035188	Pseudomonadota	Haemophilus	Haemophilus pittmaniae	Gram-											2512444057
Megasphaera sp. UPII 135-E	2512047062	Veillonellaceae	Negativicutes	Veillonellales	1000569	Bacillota	Megasphaera	Megasphaera sp. UPII 135-E	Gram-
Parvimonas sp. oral taxon 393 F0440	2512047066	Peptoniphilaceae	Tissierellia	Tissierellales	944565	Bacillota	Parvimonas	Parvimonas sp. oral taxon 393	Gram+
Peptoniphilus sp. F0436	2512047067	Peptoniphilaceae	Tissierellia	Tissierellales	879308	Bacillota	Peptoniphilus	Peptoniphilus sp. oral taxon 375	Gram+
Propionibacterium sp. CC003-HC2	2512047068	Propionibacteriaceae	Actinomycetes	Propionibacteriales	1005703	Actinomycetota	Propionibacterium	Propionibacterium sp. CC003-HC2	Gram+						2512461365	2512459843												2512460945
Sporosarcina newyorkensis 2681	2512047070	Caryophanaceae	Bacilli	Bacillales	1027292	Bacillota	Sporosarcina	Sporosarcina newyorkensis	Gram+								2512469219	2512469218|2512467148	2512469217	2512469533| 2512468586| 2512467652| 2512467750| 2512468480| 2512469563| 2512467527| 2512467514	2512467617	2512467616	2512467615														2512467710	2512467711
Streptococcus constellatus pharyngis SK1060, CCUG 46377	2512047071	Streptococcaceae	Bacilli	Lactobacillales	1035184	Bacillota	Streptococcus	Streptococcus constellatus	Gram+						2512471309
Veillonella sp. F0422	2512047076	Veillonellaceae	Negativicutes	Veillonellales	944564	Bacillota	Veillonella	Veillonella sp. oral taxon 780	Gram-
Pseudomonas aeruginosa 2_1_26	2513237259	Pseudomonadaceae	Gammaproteobacteria	Pseudomonadales	287	Pseudomonadota	Pseudomonas	Pseudomonas aeruginosa	Gram-							2514266519				2514264843 2514262573 2514267605								2514267600
Lachnospiraceae bacterium bacterium oral taxon 082 F0431	2513237260	Lachnospiraceae	Clostridia	Lachnospirales	861454	Bacillota	unclassified	Lachnospiraceae bacterium oral taxon 082	Gram+											2514270296
Haemophilus sp. oral taxon 851 F0397	2513237261	Pasteurellaceae	Gammaproteobacteria	Pasteurellales	762965	Pseudomonadota	Haemophilus	Haemophilus sp. oral taxon 851	Gram-											2514273328
Prevotella oulorum F0390	2513237263	Prevotellaceae	Bacteroidia	Bacteroidales	702438	Bacteroidota	Segatella	Segatella oulorum	Gram-							2514278132
Klebsiella sp. 4_1_44FAA	2513237265	Enterobacteriaceae	Gammaproteobacteria	Enterobacterales	665944	Pseudomonadota	Klebsiella	Klebsiella sp. 4_1_44FAA	Gram-							2514285194				2514284006| 2514283521								2514285808| 2514286201
Citrobacter portucalensis 4_7_47CFAA	2513237266	Enterobacteriaceae	Gammaproteobacteria	Enterobacterales	1639133	Pseudomonadota	Citrobacter	Citrobacter portucalensis	Gram-		2514290351	2514290350	2514290349			2514288322	2514287895	2514287894	2514287893	2514291602| 2514289377				2514288733	2514288732	2514289369	2514289370	2514288256| 2514289403							2514291697	2514291698
Tannerella sp. 6_1_58FAA_CT1	2513237267	Tannerellaceae	Bacteroidia	Bacteroidales	665949	Bacteroidota	Tannerella	Tannerella sp. 6_1_58FAA_CT1	Gram-		2514295434	2514295432	2514295431
Peptoanaerobacter stomatis ACC19a	2513237269	Filifactoraceae	Clostridia	Peptostreptococcales	796937	Bacillota	Peptoanaerobacter	Peptoanaerobacter stomatis	Gram+								2514304347	2514304348|2514304350	2514304349	2514303292| 2514302764
Neisseria shayeganii 871	2513237270	Neisseriaceae	Betaproteobacteria	Neisseriales	1032488	Pseudomonadota	Neisseria	Neisseria shayeganii	Gram-											2514307352									2514306285								2514306161	2514306163
Peptoanaerobacter stomatis CM5	2513237271	Filifactoraceae	Clostridia	Peptostreptococcales	796937	Bacillota	Peptoanaerobacter	Peptoanaerobacter stomatis	Gram+											2514309652| 2514309002
Johnsonella ignava ATCC 51276	2513237274	Lachnospiraceae	Clostridia	Lachnospirales	679200	Bacillota	Johnsonella	Johnsonella ignava	Gram+											2514318433| 2514318039																	2514318012	2514318013
Hungatella hathewayi WAL-18680	2513237275	Lachnospiraceae	Clostridia	Lachnospirales	742737	Bacillota	Hungatella	Hungatella hathewayi	Gram+		2514323130	2514323129	2514323128							2514319884
Alistipes indistinctus YIT 12060	2513237277	Rikenellaceae	Bacteroidia	Bacteroidales	742725	Bacteroidota	Alistipes	Alistipes indistinctus	Gram-		2514330010	2514330011	2514330012																			2514331171	2514331170	2514331169
Odoribacter laneus YIT 12061	2513237280	Odoribacteraceae	Bacteroidia	Bacteroidales	742817	Bacteroidota	Odoribacter	Odoribacter laneus	Gram-
Rothia aeria F0474	2513237283	Micrococcaceae	Actinomycetes	Micrococcales	1125724	Actinomycetota	Rothia	Rothia aeria	Gram+						2514345966					2514345535
Lentilactobacillus parafarraginis F0439	2513237286	Lactobacillaceae	Bacilli	Lactobacillales	797515	Bacillota	Lentilactobacillus	Lentilactobacillus parafarraginis	Gram+						2514350671	2514351545	2514351283	2514351285	2514351286																		2514350687	2514350686
Flavonifractor plautii ATCC 29863	2513237287	Oscillospiraceae	Clostridia	Eubacteriales	411475	Bacillota	Flavonifractor	Flavonifractor plautii	Gram+		2514354274	2514354275	2514354276
Acetobacteraceae bacterium AT-5844	2513237288	Acetobacteraceae	Alphaproteobacteria	Acetobacterales	1054213	Pseudomonadota	unclassified	Acetobacteraceae bacterium AT-5844	Gram-		2514360274	2514360273	2514360272	2514360275		2514359353				2514362921								2514362437							2514358849	2514358847
Streptococcus pseudopneumoniae SK674	2513237289	Streptococcaceae	Bacilli	Lactobacillales	1095734	Bacillota	Streptococcus	Streptococcus pseudopneumoniae	Gram+		2514363369	2514363368	2514363367	2514363370																		2514363693	2514363692	2514363694			2514363619	2514363618
Campylobacter sp. 10_1_50	2513237298	Campylobacteraceae	Epsilonproteobacteria	Campylobacterales	665939	Campylobacterota	Campylobacter	Campylobacter sp. 10_1_50	Gram-											2514400312
Synergistes sp. 3_1_syn1	2513237299	Synergistaceae	Synergistia	Synergistales	457415	Synergistota	Synergistes	Synergistes sp. 3_1_syn1	Gram-											2514404521| 2514404873
Anaeroglobus geminatus F0357	2513237300	Veillonellaceae	Negativicutes	Veillonellales	861450	Bacillota	Anaeroglobus	Anaeroglobus geminatus	Gram+																												2514407397	2514407398
Peptoniphilus indolicus sv. Type C	2513237301	Peptoniphilaceae	Tissierellia	Tissierellales	997350	Bacillota	Peptoniphilus	Peptoniphilus indolicus	Gram+								2514408181	2514408180|2514408178	2514408179	2514407778
Oribacterium asaccharolyticum ACB7	2513237306	Lachnospiraceae	Clostridia	Lachnospirales	796944	Bacillota	Oribacterium	Oribacterium asaccharolyticum	Gram+											2514425766
Cardiobacterium valvarum F0432	2513237308	Cardiobacteriaceae	Gammaproteobacteria	Cardiobacteriales	797473	Pseudomonadota	Cardiobacterium	Cardiobacterium valvarum	Gram-																				2514427257
Prevotella micans F0438	2513237310	Prevotellaceae	Bacteroidia	Bacteroidales	883158	Bacteroidota	Prevotella	Prevotella micans	Gram-
Subdoligranulum sp. 4_3_54A2FAA	2513237311	Oscillospiraceae	Clostridia	Eubacteriales	665956	Bacillota	Subdoligranulum	Subdoligranulum sp. 4_3_54A2FAA	Gram+
Alloprevotella rava F0323	2513237313	Prevotellaceae	Bacteroidia	Bacteroidales	679199	Bacteroidota	Alloprevotella	Alloprevotella rava	Gram-
Enterococcus saccharolyticus 30_1	2513237314	Enterococcaceae	Bacilli	Lactobacillales	742813	Bacillota	Enterococcus	Enterococcus saccharolyticus	Gram+		2514447754	2514447756	2514447757		2514447530	2514449718	2514447544	2514447541|2514447543	2514447542																		2514448519	2514448518
Enterocloster clostridioformis 2_1_49FAA	2513237315	Lachnospiraceae	Clostridia	Lachnospirales	742735	Bacillota	Enterocloster	Enterocloster clostridioformis	Gram+											2514451940| 2514453079									2514451795
Selenomonas infelix ATCC 43532	2513237316	Selenomonadaceae	Negativicutes	Selenomonadales	679201	Bacillota	Selenomonas	Selenomonas infelix	Gram+
Prevotella stercorea DSM 18206	2513237318	Prevotellaceae	Bacteroidia	Bacteroidales	1002367	Bacteroidota	Leyella	Leyella stercorea	Gram-							2514464413
Enterococcus faecalis PC1.1	2513237319	Enterococcaceae	Bacilli	Lactobacillales	791166	Bacillota	Enterococcus	Enterococcus faecalis	Gram+						2514468056	2514468067	2514468061	2514468060|2514468058	2514468059																		2514467243	2514467244
Bilophila sp. 4_1_30	2513237322	Desulfovibrionaceae	Desulfovibrionia	Desulfovibrionales	693988	Thermodesulfobacteriota	Bilophila	Bilophila sp. 4_1_30	Gram-		2514479669	2514479668	2514479667							2514482345| 2514481466| 2514481888								2514480667
Prevotella sp. C561	2513237323	Prevotellaceae	Bacteroidia	Bacteroidales	563031	Bacteroidota	Prevotella	Prevotella sp. C561	Gram-							2514485496
Desulfovibrio sp. 6_1_46AFAA	2513237324	Desulfovibrionaceae	Desulfovibrionia	Desulfovibrionales	665942	Thermodesulfobacteriota	Desulfovibrio	Desulfovibrio sp. 6_1_46AFAA	Gram-		2514486566	2514486565	2514486564
Bacillus sp. 7_6_55CFAA_CT2	2513237325	Bacillaceae	Bacilli	Bacillales	665957	Bacillota	Bacillus	Bacillus sp. 7_6_55CFAA_CT2	Gram+						2514491238					2514494557| 2514493777| 2514493565								2514492368
Lachnospiraceae bacterium sp. 7_1_58FAA	2513237329	Lachnospiraceae	Clostridia	Lachnospirales	658087	Bacillota	unclassified	Lachnospiraceae bacterium 7_1_58FAA	Gram+		2514508876	2514508875	2514508874
Fusobacterium necrophorum funduliforme 1_1_36S	2513237330	Fusobacteriaceae	Fusobacteriia	Fusobacteriales	742814	Fusobacteriota	Fusobacterium	Fusobacterium necrophorum	Gram-																				2514512652
Myroides odoratimimus CCUG 10230	2513237331	Flavobacteriaceae	Flavobacteriia	Flavobacteriales	883150	Bacteroidota	Myroides	Myroides odoratimimus	Gram-							2514516087				2514515685									2514518409
Erysipelotrichaceae bacterium sp. 21_3	2513237332	Erysipelotrichaceae	Erysipelotrichia	Erysipelotrichales	658657	Bacillota	unclassified	Erysipelotrichaceae bacterium 21_3	Gram+		2514519294	2514519293	2514519292		2514521889																						2514520749	2514520748
Roseomonas cervicalis ATCC 49957	2513237333	Roseomonadaceae	Alphaproteobacteria	Acetobacterales	525371	Pseudomonadota	Roseomonas	Teichococcus cervicalis	Gram-							2514525579	2514524228	2514524229	2514524230	2514525004								2514527296							2514525011	2514525013
Fusobacterium sp. oral taxon 370 F0437	2513237336	Fusobacteriaceae	Fusobacteriia	Fusobacteriales	861452	Fusobacteriota	Fusobacterium	Fusobacterium sp. oral taxon 370	Gram-
Lachnospiraceae bacterium ACC2	2513237338	Lachnospiraceae	Clostridia	Lachnospirales	796942	Bacillota	Stomatobaculum	Stomatobaculum longum	Gram+											2514542842
Dolosigranulum pigrum ATCC 51524	2513237341	Carnobacteriaceae	Bacilli	Lactobacillales	883103	Bacillota	Dolosigranulum	Dolosigranulum pigrum	Gram+								2514555000	2514554997|2514554999	2514554998
Dorea formicigenerans 4_6_53AFAA	2513237343	Lachnospiraceae	Clostridia	Lachnospirales	742765	Bacillota	Dorea	Dorea formicigenerans	Gram+											2514561296 2514563800
Collinsella tanakaei YIT 12063	2513237344	Coriobacteriaceae	Coriobacteriia	Coriobacteriales	742742	Actinomycetota	Collinsella	Collinsella tanakaei	Gram+							2514565964
Erysipelotrichaceae bacterium 2_2_44A	2513237345	Erysipelotrichaceae	Erysipelotrichia	Erysipelotrichales	457422	Bacillota	unclassified	Erysipelotrichaceae bacterium 2_2_44A	Gram+		2514565859	2514565860	2514565861		2514569197
Lentilactobacillus kisonensis F0435	2513237347	Lactobacillaceae	Bacilli	Lactobacillales	797516	Bacillota	Lentilactobacillus	Lentilactobacillus kisonensis	Gram+						2514575720		2514575186	2514575185	2514575184																		2514577131	2514577132
Eubacterium sp. 3_1_31	2513237348	Eubacteriaceae	Clostridia	Eubacteriales	457402	Bacillota	Eubacterium	Eubacterium sp. 3_1_31	Gram+
Dialister succinatiphilus YIT 11850	2513237349	Veillonellaceae	Negativicutes	Veillonellales	742743	Bacillota	Dialister	Dialister succinatiphilus	Gram-
Prevotella maculosa OT 289	2513237350	Prevotellaceae	Bacteroidia	Bacteroidales	999422	Bacteroidota	Segatella	Segatella maculosa	Gram-
Helcococcus kunzii ATCC 51366	2513237357	Peptoniphilaceae	Tissierellia	Tissierellales	883114	Bacillota	Helcococcus	Helcococcus kunzii	Gram+
Facklamia languida CCUG 37842	2513237358	Aerococcaceae	Bacilli	Lactobacillales	883113	Bacillota	Facklamia	Facklamia languida	Gram+		2514612138	2514612139	2514612140
Olsenella sp. oral taxon 809 F0356	2513237359	Atopobiaceae	Coriobacteriia	Coriobacteriales	661087	Actinomycetota	Olsenella	Olsenella sp. oral taxon 809	Gram+							2514614584
Enterocloster citroniae WAL-17108	2513237360	Lachnospiraceae	Clostridia	Lachnospirales	742733	Bacillota	Enterocloster	Enterocloster citroniae	Gram+		2514614695	2514614694	2514614693							2514618954| 2514617600| 2514615175
Streptococcus sp. SK643	2513237362	Streptococcaceae	Bacilli	Lactobacillales	1095727	Bacillota	Streptococcus	Streptococcus sp. SK643	Gram+						2514625486																	2514626460	2514626459	2514626461			2514626944	2514626943
Streptococcus sp. SK140	2513237363	Streptococcaceae	Bacilli	Lactobacillales	1095726	Bacillota	Streptococcus	Streptococcus sp. SK140	Gram+						2514627743																	2514628812	2514628813	2514628811			2514627988	2514627987
Coprobacillus sp. 8_2_54BFAA	2513237364	Coprobacillaceae	Erysipelotrichia	Erysipelotrichales	469597	Bacillota	Coprobacillus	Coprobacillus sp. 8_2_54BFAA	Gram+
Clostridium sp. 7_3_54FAA	2513237367	Clostridiaceae	Clostridia	Eubacteriales	665940	Bacillota	Clostridium	Clostridium sp. 7_3_54FAA	Gram+		2514639890	2514639891	2514639892				2514640259	2514640258	2514640257	2514639135| 2514638221| 2514639437| 2514639769| 2514639433
Sutterella parvirubra YIT 11816	2513237371	Sutterellaceae	Betaproteobacteria	Burkholderiales	762967	Pseudomonadota	Sutterella	Sutterella parvirubra	Gram-
Streptococcus sp. oral taxon 058 F0407	2513237373	Streptococcaceae	Bacilli	Lactobacillales	861455	Bacillota	Streptococcus	Streptococcus sp. oral taxon 058	Gram+						2514661596
Prevotella sp. oral taxon 306 F0472	2513237374	Prevotellaceae	Bacteroidia	Bacteroidales	1095752	Bacteroidota	Prevotella	Prevotella sp. oral taxon 306	Gram-							2514661919
Actinomyces graevenitzii C83	2513237375	Actinomycetaceae	Actinomycetes	Actinomycetales	435830	Actinomycetota	Actinomyces	Actinomyces graevenitzii	Gram+						2514664624
Coprobacillus sp. 3_3_56FAA	2513237376	Coprobacillaceae	Erysipelotrichia	Erysipelotrichales	665941	Bacillota	Coprobacillus	Coprobacillus sp. 3_3_56FAA	Gram+		2514668650	2514668649	2514668648																								2514666674	2514666673
Hafnia alvei ATCC 51873	2513237377	Hafniaceae	Gammaproteobacteria	Enterobacterales	1002364	Pseudomonadota	Hafnia	Hafnia alvei	Gram+		2514674707	2514674706	2514674705	2514674708		2514673291	2514674423|2514674530	2514674424|2514674531|2514674529	2514674425|2514674532	2514675143				2514671453	2514671454	2514670332	2514670333	2514672828| 2514670809| 2514670361
Eubacterium infirmum F0142	2513237384	Anaerovoracaceae	Clostridia	Peptostreptococcales	883109	Bacillota	unclassified	[Eubacterium] infirmum	Gram+
Bacillus smithii 7_3_47FAA	2513237385	Bacillaceae	Bacilli	Bacillales	665952	Bacillota	Bacillus	Bacillus smithii	Gram+						2514699971
Actinomyces sp. F0330	2513237386	Actinomycetaceae	Actinomycetes	Actinomycetales	653386	Actinomycetota	Actinomyces	Actinomyces sp. oral taxon 849	Gram+						2514704906		2514705210	2514705209	2514705208	2514703073| 2514705612								2514704007	2514703989
Propionibacterium sp. 5_U_42AFAA	2513237388	Propionibacteriaceae	Actinomycetes	Propionibacteriales	450748	Actinomycetota	Propionibacterium	Propionibacterium sp. 5_U_42AFAA	Gram+		2514711586	2514711587	2514711588	2514711585	2514712539	2514711232	2514713295	2514713296	2514713297									2514712125
Cutibacterium avidum VPI 0179	2513237389	Propionibacteriaceae	Actinomycetes	Propionibacteriales	997355	Actinomycetota	Cutibacterium	Cutibacterium avidum	Gram+						2514715319	2514714275
Paraprevotella clara YIT 11840	2513237390	Prevotellaceae	Bacteroidia	Bacteroidales	762968	Bacteroidota	Paraprevotella	Paraprevotella clara	Gram-
Prevotella histicola F0411	2513237391	Prevotellaceae	Bacteroidia	Bacteroidales	857291	Bacteroidota	Prevotella	Prevotella histicola	Gram-							2514722212
Neisseria wadsworthii 9715	2513237392	Neisseriaceae	Betaproteobacteria	Neisseriales	1030841	Pseudomonadota	Neisseria	Neisseria wadsworthii	Gram-											2514724684| 2514723070| 2514723652									2514724239
Neisseria sp. GT4A_CT1	2513237394	Neisseriaceae	Betaproteobacteria	Neisseriales	665946	Pseudomonadota	Neisseria	Neisseria sp. GT4A_CT1	Gram-											2514728548									2514728403
Lactobacillus iners 7_1_47FAA	2513237395	Lactobacillaceae	Bacilli	Lactobacillales	147802	Bacillota	Lactobacillus	Lactobacillus iners	Gram+							2514731027
Megamonas funiformis YIT 11815	2513237399	Selenomonadaceae	Negativicutes	Selenomonadales	742816	Bacillota	Megamonas	Megamonas funiformis	Gram-
Enterococcus faecium 514	2519103062	Enterococcaceae	Bacilli	Lactobacillales	1134812	Bacillota	Enterococcus	Enterococcus faecium	Gram+						2519325705	2519327180	2519325715	2519325714|2519325712	2519325713																		2519326179	2519326180
Enterococcus faecium 515	2519103063	Enterococcaceae	Bacilli	Lactobacillales	1134813	Bacillota	Enterococcus	Enterococcus faecium	Gram+						2519330571	2519329668	2519330562	2519330565|2519330563	2519330564																		2519328764	2519328763
Enterococcus faecium C1904	2519103064	Enterococcaceae	Bacilli	Lactobacillales	1134814	Bacillota	Enterococcus	Enterococcus faecium	Gram+						2519333667	2519333690
Enterococcus faecium C497	2519103065	Enterococcaceae	Bacilli	Lactobacillales	1134815	Bacillota	Enterococcus	Enterococcus faecium	Gram+						2519336899	2519336876																					2519334381	2519334382
Enterococcus faecium C621	2519103066	Enterococcaceae	Bacilli	Lactobacillales	1134816	Bacillota	Enterococcus	Enterococcus faecium	Gram+						2519338274	2519339692	2519338265	2519338266|2519338268	2519338267																		2519337745	2519337744
Enterococcus faecium E417	2519103067	Enterococcaceae	Bacilli	Lactobacillales	1134817	Bacillota	Enterococcus	Enterococcus faecium	Gram+						2519341886	2519342019
Enterococcus faecium E422	2519103068	Enterococcaceae	Bacilli	Lactobacillales	1134818	Bacillota	Enterococcus	Enterococcus faecium	Gram+						2519344787	2519345577	2519344797	2519344796|2519344794	2519344795																		2519345447	2519345448
Enterococcus faecium ERV1	2519103069	Enterococcaceae	Bacilli	Lactobacillales	1134819	Bacillota	Enterococcus	Enterococcus faecium	Gram+						2519348162	2519349015	2519348152	2519348155|2519348153	2519348154																		2519349209	2519349208
Enterococcus faecium ERV102	2519103070	Enterococcaceae	Bacilli	Lactobacillales	1134820	Bacillota	Enterococcus	Enterococcus faecium	Gram+						2519349736	2519350745
Enterococcus faecium ERV161	2519103071	Enterococcaceae	Bacilli	Lactobacillales	1134821	Bacillota	Enterococcus	Enterococcus faecium	Gram+						2519353294	2519353584
Enterococcus faecalis ERV37	2519103090	Enterococcaceae	Bacilli	Lactobacillales	1134790	Bacillota	Enterococcus	Enterococcus faecalis	Gram+						2519440226	2519440213
Enterococcus faecalis ERV31	2519103091	Enterococcaceae	Bacilli	Lactobacillales	1134789	Bacillota	Enterococcus	Enterococcus faecalis	Gram+		2519445816	2519445817	2519445818		2519443215	2519443227	2519443220	2519443217|2519443219	2519443218																		2519443843	2519443844
Enterococcus faecalis ERV116	2519103092	Enterococcaceae	Bacilli	Lactobacillales	1134786	Bacillota	Enterococcus	Enterococcus faecalis	Gram+		2519447299	2519447300	2519447301		2519446300	2519446311	2519446305	2519446302|2519446304	2519446303																		2519448127	2519448128
Enterococcus faecalis ERV103	2519103116	Enterococcaceae	Bacilli	Lactobacillales	1134785	Bacillota	Enterococcus	Enterococcus faecalis	Gram+		2519521146	2519521147	2519521148		2519519578	2519519590	2519519583	2519519580|2519519582	2519519581																		2519520262	2519520263
Enterococcus faecalis ERV25	2519103117	Enterococcaceae	Bacilli	Lactobacillales	1134788	Bacillota	Enterococcus	Enterococcus faecalis	Gram+						2519522731	2519522719
Enterococcus faecalis ERV129	2519103118	Enterococcaceae	Bacilli	Lactobacillales	1134787	Bacillota	Enterococcus	Enterococcus faecalis	Gram+						2519525633	2519525645
Enterococcus faecalis 599	2519103119	Enterococcaceae	Bacilli	Lactobacillales	1134784	Bacillota	Enterococcus	Enterococcus faecalis	Gram+						2519528969	2519528980	2519528974	2519528973|2519528971	2519528972																		2519531653	2519531654
Enterococcus faecalis ERV85	2519103133	Enterococcaceae	Bacilli	Lactobacillales	1134799	Bacillota	Enterococcus	Enterococcus faecalis	Gram+		2519600050	2519600051	2519600052			2519597127	2519597134	2519597137|2519597135	2519597136																		2519599099	2519599098
Enterococcus faecalis ERV93	2519103134	Enterococcaceae	Bacilli	Lactobacillales	1134800	Bacillota	Enterococcus	Enterococcus faecalis	Gram+		2519603352	2519603351	2519603350		2519600370	2519600382	2519600375	2519600372|2519600374	2519600373																		2519602457	2519602458
Enterococcus faecalis ERV63	2519103135	Enterococcaceae	Bacilli	Lactobacillales	1134793	Bacillota	Enterococcus	Enterococcus faecalis	Gram+		2519605173	2519605172	2519605171		2519605096	2519605083	2519605091	2519605094|2519605092	2519605093																		2519603841	2519603840
Enterococcus faecalis ERV65	2519103136	Enterococcaceae	Bacilli	Lactobacillales	1134794	Bacillota	Enterococcus	Enterococcus faecalis	Gram+		2519610042	2519610041	2519610040		2519607161	2519607173	2519607166	2519607163|2519607165	2519607164																		2519607781	2519607782
Enterococcus faecalis ERV41	2519103137	Enterococcaceae	Bacilli	Lactobacillales	1134791	Bacillota	Enterococcus	Enterococcus faecalis	Gram+						2519610799	2519611732
Enterococcus faecalis ERV62	2519103138	Enterococcaceae	Bacilli	Lactobacillales	1134792	Bacillota	Enterococcus	Enterococcus faecalis	Gram+						2519613946	2519613933
Enterococcus faecalis ERV73	2519103139	Enterococcaceae	Bacilli	Lactobacillales	1134797	Bacillota	Enterococcus	Enterococcus faecalis	Gram+		2519619141	2519619140	2519619139		2519616879	2519616890	2519616884	2519616881|2519616883	2519616882																		2519619655	2519619654
Enterococcus faecalis ERV81	2519103140	Enterococcaceae	Bacilli	Lactobacillales	1134798	Bacillota	Enterococcus	Enterococcus faecalis	Gram+		2519622052	2519622051	2519622050		2519620340	2519620327																					2519620826	2519620825
Enterococcus faecalis ERV68	2519103141	Enterococcaceae	Bacilli	Lactobacillales	1134795	Bacillota	Enterococcus	Enterococcus faecalis	Gram+		2519625265	2519625266	2519625267		2519623972	2519623959	2519623967	2519623970|2519623968	2519623969																		2519624526	2519624525
Enterococcus faecalis ERV72	2519103142	Enterococcaceae	Bacilli	Lactobacillales	1134796	Bacillota	Enterococcus	Enterococcus faecalis	Gram+						2519626867	2519626854
Desulfitobacterium hafniense DP7	2522572064	Desulfitobacteriaceae	Clostridia	Eubacteriales	537010	Bacillota	Desulfitobacterium	Desulfitobacterium hafniense	Gram+						2522800785					2522800403| 2522801138| 2522801133| 2522797155| 2522797160
Myroides odoratimimus CCUG 12901	2522572175	Flavobacteriaceae	Flavobacteriia	Flavobacteriales	883152	Bacteroidota	Myroides	Myroides odoratimimus	Gram-							2523162911				2523163312
Myroides odoratimimus CIP 103059	2522572176	Flavobacteriaceae	Flavobacteriia	Flavobacteriales	883155	Bacteroidota	Myroides	Myroides odoratus	Gram-		2523167623	2523167624	2523167625			2523168174				2523168535
Myroides odoratimimus CIP 101113	2522572177	Flavobacteriaceae	Flavobacteriia	Flavobacteriales	883154	Bacteroidota	Myroides	Myroides odoratimimus	Gram-							2523170485				2523170887
Myroides odoratimimus CCUG 3837	2523231006	Flavobacteriaceae	Flavobacteriia	Flavobacteriales	883153	Bacteroidota	Myroides	Myroides odoratimimus	Gram-							2523250350				2523251320| 2523250751
Clostridium celatum DSM 1785	2524023202	Clostridiaceae	Clostridia	Eubacteriales	545697	Bacillota	Clostridium	Clostridium celatum	Gram+
Clostridium sp. MSTE9	2524023211	Clostridiaceae	Clostridia	Eubacteriales	1105031	Bacillota	Clostridium	Clostridium sp. MSTE9	Gram+											2524475628
Anaerococcus prevotii ACS-065-V-Col13	2529292727	Peptoniphilaceae	Tissierellia	Tissierellales	879305	Bacillota	Anaerococcus	Anaerococcus prevotii	Gram+
Staphylococcus epidermidis NIHLM061	2529292797	Staphylococcaceae	Bacilli	Bacillales	979204	Bacillota	Staphylococcus	Staphylococcus epidermidis	Gram+						2530044187		2530044199|2530044506	2530044196|2530044198|2530044505|2530044503	2530044504|2530044197	2530044339| 2530043079| 2530044472								2530043803		2530044336	2530044337						2530043647	2530043646
Staphylococcus epidermidis NIHLM057	2529292798	Staphylococcaceae	Bacilli	Bacillales	979205	Bacillota	Staphylococcus	Staphylococcus epidermidis	Gram+						2530045196		2530045208|2530045835	2530045838|2530045205|2530045836|2530045207	2530045837|2530045206	2530046008| 2530046871| 2530045866										2530046011	2530046010						2530044899	2530044898
Staphylococcus epidermidis NIHLM021	2529292800	Staphylococcaceae	Bacilli	Bacillales	979212	Bacillota	Staphylococcus	Staphylococcus epidermidis	Gram+						2530050674		2530051743|2530050686	2530050685|2530051742|2530051740|2530050683	2530050684|2530051741	2530050820| 2530051962| 2530050398									2530051340	2530050817	2530050818						2530051157	2530051156
Staphylococcus epidermidis NIHLM020	2529292801	Staphylococcaceae	Bacilli	Bacillales	979213	Bacillota	Staphylococcus	Staphylococcus epidermidis	Gram+						2530053554					2530053659| 2530053347| 2530052923
Staphylococcus epidermidis NIHLM037	2529292802	Staphylococcaceae	Bacilli	Bacillales	979210	Bacillota	Staphylococcus	Staphylococcus epidermidis	Gram+						2530055079					2530055792| 2530054721| 2530056098
Staphylococcus epidermidis NIHLM023	2529292803	Staphylococcaceae	Bacilli	Bacillales	979211	Bacillota	Staphylococcus	Staphylococcus epidermidis	Gram+						2530058238					2530057213| 2530057346| 2530058932								2530058731
Staphylococcus epidermidis NIHLM040	2529292804	Staphylococcaceae	Bacilli	Bacillales	979208	Bacillota	Staphylococcus	Staphylococcus epidermidis	Gram+						2530060829		2530060024|2530060817	2530060820|2530060021|2530060023|2530060818	2530060022|2530060819	2530059313| 2530059444| 2530059990										2530059310	2530059311
Staphylococcus epidermidis NIHLM039	2529292805	Staphylococcaceae	Bacilli	Bacillales	979209	Bacillota	Staphylococcus	Staphylococcus epidermidis	Gram+						2530063565		2530063884|2530063577	2530063574|2530063883|2530063576|2530063881	2530063575|2530063882	2530063719| 2530062592| 2530063848										2530063716	2530063717						2530063110	2530063109
Staphylococcus epidermidis NIHLM053	2529292806	Staphylococcaceae	Bacilli	Bacillales	979206	Bacillota	Staphylococcus	Staphylococcus epidermidis	Gram+						2530065513					2530064863| 2530064725| 2530066041
Staphylococcus epidermidis NIHLM049	2529292807	Staphylococcaceae	Bacilli	Bacillales	979207	Bacillota	Staphylococcus	Staphylococcus epidermidis	Gram+											2530068909| 2530068056| 2530069019
Capnocytophaga sp. oral taxon 332 F0381	2529292815	Flavobacteriaceae	Flavobacteriia	Flavobacteriales	1127692	Bacteroidota	Capnocytophaga	Capnocytophaga sp. oral taxon 332	Gram-
Capnocytophaga sp. oral taxon 326 F0382	2529292816	Flavobacteriaceae	Flavobacteriia	Flavobacteriales	1035193	Bacteroidota	Capnocytophaga	Capnocytophaga sp. oral taxon 326	Gram-																												2530091984	2530091983
Capnocytophaga sp. oral taxon 380 F0488	2529292817	Flavobacteriaceae	Flavobacteriia	Flavobacteriales	1127693	Bacteroidota	Capnocytophaga	Capnocytophaga sp. oral taxon 380	Gram-
Cutibacterium acnes HL002PA2	2529292840	Propionibacteriaceae	Actinomycetes	Propionibacteriales	765116	Actinomycetota	Cutibacterium	Cutibacterium acnes	Gram+		2530197067	2530197068	2530197069	2530197066	2530198352	2530197650	2530196483	2530196482	2530196481									2530198798							2530198458	2530198457
Cutibacterium acnes HL063PA2	2529292847	Propionibacteriaceae	Actinomycetes	Propionibacteriales	765114	Actinomycetota	Cutibacterium	Cutibacterium acnes	Gram+		2530218931	2530218932	2530218933	2530218930	2530220241	2530218661	2530218286	2530218285	2530218284									2530219781							2530220132	2530220133
Enterococcus faecalis TX2141	2529292854	Enterococcaceae	Bacilli	Lactobacillales	749492	Bacillota	Enterococcus	Enterococcus faecalis	Gram+						2530244908	2530244897	2530244903	2530244906|2530244904	2530244905																		2530245564	2530245565
Enterococcus faecalis TX2137	2529292855	Enterococcaceae	Bacilli	Lactobacillales	749491	Bacillota	Enterococcus	Enterococcus faecalis	Gram+						2530247940	2530247951
Enterococcus faecalis TX4244	2529292856	Enterococcaceae	Bacilli	Lactobacillales	749494	Bacillota	Enterococcus	Enterococcus faecalis	Gram+						2530250935	2530250946
Enterococcus faecalis TX4000	2529292857	Enterococcaceae	Bacilli	Lactobacillales	749493	Bacillota	Enterococcus	Enterococcus faecalis	Gram+						2530254970	2530254160	2530254965	2530254968|2530254966	2530254967																		2530253382	2530253381
Streptococcus dysgalactiae equisimilis SK1249	2529292875	Streptococcaceae	Bacilli	Lactobacillales	1000589	Bacillota	Streptococcus	Streptococcus dysgalactiae	Gram+							2530341781																					2530340346	2530340347
Streptococcus dysgalactiae equisimilis SK1250	2529292876	Streptococcaceae	Bacilli	Lactobacillales	1005706	Bacillota	Streptococcus	Streptococcus dysgalactiae	Gram+							2530344198																					2530343643	2530343644
Streptococcus parasanguinis SK236	2529292877	Streptococcaceae	Bacilli	Lactobacillales	1035185	Bacillota	Streptococcus	Streptococcus parasanguinis	Gram+						2530345951
Streptococcus australis SK956	2529292878	Streptococcaceae	Bacilli	Lactobacillales	888833	Bacillota	Streptococcus	Streptococcus australis	Gram+											2530348456																	2530347520	2530347521
Streptococcus oralis SK255	2529292879	Streptococcaceae	Bacilli	Lactobacillales	1005704	Bacillota	Streptococcus	Streptococcus oralis	Gram+						2530349304 2530349305
Streptococcus mitis bv. 2 SK95	2529292880	Streptococcaceae	Bacilli	Lactobacillales	1000588	Bacillota	Streptococcus	Streptococcus oralis	Gram+						2530351814																	2530350970	2530350969	2530350971			2530351663	2530351662
Lachnoanaerobaculum saburreum F0468	2529292881	Lachnospiraceae	Clostridia	Lachnospirales	1095750	Bacillota	Lachnoanaerobaculum	Lachnoanaerobaculum saburreum	Gram+											2530355557																	2530355589	2530355590
Escherichia coli MS 57-2	2529292890	Enterobacteriaceae	Gammaproteobacteria	Enterobacterales	749529	Pseudomonadota	Escherichia	Escherichia coli	Gram-		2530402938	2530402937	2530402936			2530401158	2530403420|2530402687	2530403421|2530402688|2530402686	2530403422|2530402685	2530404105| 2530398935| 2530400755				2530399664	2530399665	2530400763	2530400762	2530400494		2530398932	2530398933				2530401906	2530401905
Veillonella atypica KON, ATCC 17744	2529292891	Veillonellaceae	Negativicutes	Veillonellales	1128111	Bacillota	Veillonella	Veillonella atypica	Gram-
Lactobacillus crispatus FB049-03	2529292892	Lactobacillaceae	Bacilli	Lactobacillales	883094	Bacillota	Lactobacillus	Lactobacillus crispatus	Gram+							2530408283| 2530406506
Lactobacillus crispatus FB077-07	2529292893	Lactobacillaceae	Bacilli	Lactobacillales	883092	Bacillota	Lactobacillus	Lactobacillus crispatus	Gram+							2530408752| 2530409945
Aeromonas veronii AER397	2529292914	Aeromonadaceae	Gammaproteobacteria	Aeromonadales	1073384	Pseudomonadota	Aeromonas	Aeromonas veronii	Gram-		2530503225	2530503226	2530503227			2530499892				2530501492								2530498356
Aeromonas veronii AMC34	2529292915	Aeromonadaceae	Gammaproteobacteria	Aeromonadales	1073383	Pseudomonadota	Aeromonas	Aeromonas veronii	Gram-		2530509781	2530509782	2530509783			2530505145	2530506477	2530506476	2530506475	2530503835				2530503597	2530503596			2530503651
Aeromonas veronii AER39	2529292916	Aeromonadaceae	Gammaproteobacteria	Aeromonadales	1073382	Pseudomonadota	Aeromonas	Aeromonas veronii	Gram-							2530506703				2530507993				2530510146	2530510145			2530510195	2530507818
Aeromonas dhakensis SSU	2529292917	Aeromonadaceae	Gammaproteobacteria	Aeromonadales	196024	Pseudomonadota	Aeromonas	Aeromonas dhakensis	Gram-							2530512192| 2530512300				2530513630
Aeromonas veronii AMC35	2529292918	Aeromonadaceae	Gammaproteobacteria	Aeromonadales	1073385	Pseudomonadota	Aeromonas	Aeromonas veronii	Gram-		2530515671	2530515672	2530515673			2530517650				2530519261				2530516044	2530516043				2530519094
Barnesiella intestinihominis YIT 11860	2529292932	Barnesiellaceae	Bacteroidia	Bacteroidales	742726	Bacteroidota	Barnesiella	Barnesiella intestinihominis	Gram-		2530573948	2530573949	2530573950
Slackia piriformis YIT 12062	2529292933	Eggerthellaceae	Coriobacteriia	Eggerthellales	742818	Actinomycetota	Slackia	Slackia piriformis	Gram+
Cutibacterium acnes HL082PA2	2529292952	Propionibacteriaceae	Actinomycetes	Propionibacteriales	765121	Actinomycetota	Cutibacterium	Cutibacterium acnes	Gram+		2530652095	2530652096	2530652097	2530652094	2530650942	2530651713	2530651613	2530651614	2530651615																2530651045	2530651044
Helicobacter pylori GAM118Bi	2529292955	Helicobacteraceae	Epsilonproteobacteria	Campylobacterales	1159027	Campylobacterota	Helicobacter	Helicobacter pylori	Gram-																				2530659683
Helicobacter pylori GAM115Ai	2529292956	Helicobacteraceae	Epsilonproteobacteria	Campylobacterales	1159025	Campylobacterota	Helicobacter	Helicobacter pylori	Gram-
Helicobacter pylori GAM114Ai	2529292957	Helicobacteraceae	Epsilonproteobacteria	Campylobacterales	1159024	Campylobacterota	Helicobacter	Helicobacter pylori	Gram-																				2530663635
Helicobacter pylori GAM112Ai	2529292958	Helicobacteraceae	Epsilonproteobacteria	Campylobacterales	1159023	Campylobacterota	Helicobacter	Helicobacter pylori	Gram-
Helicobacter pylori GAM105Ai	2529292959	Helicobacteraceae	Epsilonproteobacteria	Campylobacterales	1159022	Campylobacterota	Helicobacter	Helicobacter pylori	Gram-
Helicobacter pylori GAM103Bi	2529292960	Helicobacteraceae	Epsilonproteobacteria	Campylobacterales	1159021	Campylobacterota	Helicobacter	Helicobacter pylori	Gram-
Helicobacter pylori GAM101Biv	2529292961	Helicobacteraceae	Epsilonproteobacteria	Campylobacterales	1159020	Campylobacterota	Helicobacter	Helicobacter pylori	Gram-
Helicobacter pylori GAM120Ai	2529292962	Helicobacteraceae	Epsilonproteobacteria	Campylobacterales	1159029	Campylobacterota	Helicobacter	Helicobacter pylori	Gram-
Helicobacter pylori GAM119Bi	2529292963	Helicobacteraceae	Epsilonproteobacteria	Campylobacterales	1159028	Campylobacterota	Helicobacter	Helicobacter pylori	Gram-
Streptococcus oralis SK313	2529292983	Streptococcaceae	Bacilli	Lactobacillales	1035190	Bacillota	Streptococcus	Streptococcus oralis	Gram+						2530763977
Treponema denticola AL-2	2529292986	Treponemataceae	Spirochaetia	Spirochaetales	999426	Spirochaetota	Treponema	Treponema denticola	Gram-											2530773234
Treponema denticola ASLM	2529292987	Treponemataceae	Spirochaetia	Spirochaetales	999427	Spirochaetota	Treponema	Treponema denticola	Gram-											2530777471
Treponema denticola US-Trep	2529292988	Treponemataceae	Spirochaetia	Spirochaetales	999440	Spirochaetota	Treponema	Treponema denticola	Gram-											2530779240
Treponema denticola H-22	2529292989	Treponemataceae	Spirochaetia	Spirochaetales	999432	Spirochaetota	Treponema	Treponema denticola	Gram-											2530780677
Treponema denticola H1-T	2529292990	Treponemataceae	Spirochaetia	Spirochaetales	999431	Spirochaetota	Treponema	Treponema denticola	Gram-											2530785415
Neisseria sp. oral taxon 020 F0370	2529292994	Neisseriaceae	Betaproteobacteria	Neisseriales	1127694	Pseudomonadota	Neisseria	Neisseria sp. oral taxon 020	Gram-
Actinobaculum massiliae ACS-171-V-Col2	2529293003	Actinomycetaceae	Actinomycetes	Actinomycetales	883066	Actinomycetota	Actinobaculum	Actinobaculum massiliense	Gram+							2530839441				2530839437
Streptococcus sanguinis ATCC 29667	2529293055	Streptococcaceae	Bacilli	Lactobacillales	997356	Bacillota	Streptococcus	Streptococcus sanguinis	Gram+
Parabacteroides merdae CL03T12C32	2529293058	Tannerellaceae	Bacteroidia	Bacteroidales	999420	Bacteroidota	Parabacteroides	Parabacteroides merdae	Gram-
Finegoldia magna HMS01	2529293059	Peptoniphilaceae	Tissierellia	Tissierellales	866779	Bacillota	Finegoldia	Finegoldia magna	Gram+											2531045638
Slackia sp. CM382	2529293077	Eggerthellaceae	Coriobacteriia	Eggerthellales	1111137	Actinomycetota	Slackia	Slackia sp. CM382	Gram+																				2531136156
Streptococcus pneumoniae PNI0212	2529293125	Streptococcaceae	Bacilli	Lactobacillales	1159099	Bacillota	Streptococcus	Streptococcus pneumoniae	Gram+																							2531300983	2531300984	2531300982			2531302886	2531302887
Helicobacter pylori HP250ASi	2529293155	Helicobacteraceae	Epsilonproteobacteria	Campylobacterales	1159069	Campylobacterota	Helicobacter	Helicobacter pylori	Gram-
Helicobacter pylori HP250AFiV	2529293156	Helicobacteraceae	Epsilonproteobacteria	Campylobacterales	1159068	Campylobacterota	Helicobacter	Helicobacter pylori	Gram-
Helicobacter pylori GAMchJs124i	2529293157	Helicobacteraceae	Epsilonproteobacteria	Campylobacterales	1159062	Campylobacterota	Helicobacter	Helicobacter pylori	Gram-
Helicobacter pylori GAMchJs117Ai	2529293158	Helicobacteraceae	Epsilonproteobacteria	Campylobacterales	1159061	Campylobacterota	Helicobacter	Helicobacter pylori	Gram-
Helicobacter pylori GAMchJs114i	2529293159	Helicobacteraceae	Epsilonproteobacteria	Campylobacterales	1159060	Campylobacterota	Helicobacter	Helicobacter pylori	Gram-
Helicobacter pylori HP250AFiii	2529293160	Helicobacteraceae	Epsilonproteobacteria	Campylobacterales	1159067	Campylobacterota	Helicobacter	Helicobacter pylori	Gram-
Helicobacter pylori HP250AFii	2529293161	Helicobacteraceae	Epsilonproteobacteria	Campylobacterales	1159066	Campylobacterota	Helicobacter	Helicobacter pylori	Gram-
Helicobacter pylori HP116Bi	2529293162	Helicobacteraceae	Epsilonproteobacteria	Campylobacterales	1159065	Campylobacterota	Helicobacter	Helicobacter pylori	Gram-
Helicobacter pylori GAMchJs136i	2529293163	Helicobacteraceae	Epsilonproteobacteria	Campylobacterales	1159064	Campylobacterota	Helicobacter	Helicobacter pylori	Gram-
Staphylococcus aureus aureus CM05	2529293169	Staphylococcaceae	Bacilli	Bacillales	1134842	Bacillota	Staphylococcus	Staphylococcus aureus	Gram+		2531458001	2531458000	2531457999	2531458002	2531458148		2531458140	2531458141|2531458143	2531458142	2531457607| 2531457353| 2531458815										2531457610	2531457609						2531457050	2531457051
Bifidobacterium longum longum 44B	2529293221	Bifidobacteriaceae	Actinomycetes	Bifidobacteriales	1161743	Actinomycetota	Bifidobacterium	Bifidobacterium longum	Gram+							2531646019| 2531645516
Streptococcus intermedius F0413	2529293222	Streptococcaceae	Bacilli	Lactobacillales	883167	Bacillota	Streptococcus	Streptococcus intermedius	Gram+						2531648961																						2531648293	2531648294
Bifidobacterium longum longum 35B	2529293225	Bifidobacteriaceae	Actinomycetes	Bifidobacteriales	1161904	Actinomycetota	Bifidobacterium	Bifidobacterium longum	Gram+							2531661525| 2531661045													2531659903
Helicobacter pylori GAM260Bi	2529293254	Helicobacteraceae	Epsilonproteobacteria	Campylobacterales	1159045	Campylobacterota	Helicobacter	Helicobacter pylori	Gram-																				2531765400
Helicobacter pylori GAM260ASi	2529293255	Helicobacteraceae	Epsilonproteobacteria	Campylobacterales	1159044	Campylobacterota	Helicobacter	Helicobacter pylori	Gram-
Helicobacter pylori GAM263BFi	2529293256	Helicobacteraceae	Epsilonproteobacteria	Campylobacterales	1159047	Campylobacterota	Helicobacter	Helicobacter pylori	Gram-																				2531768734
Helicobacter pylori GAM260BSi	2529293257	Helicobacteraceae	Epsilonproteobacteria	Campylobacterales	1159046	Campylobacterota	Helicobacter	Helicobacter pylori	Gram-
Helicobacter pylori GAM252Bi	2529293258	Helicobacteraceae	Epsilonproteobacteria	Campylobacterales	1159041	Campylobacterota	Helicobacter	Helicobacter pylori	Gram-
Helicobacter pylori GAM250T	2529293259	Helicobacteraceae	Epsilonproteobacteria	Campylobacterales	1159040	Campylobacterota	Helicobacter	Helicobacter pylori	Gram-
Helicobacter pylori GAM254Ai	2529293260	Helicobacteraceae	Epsilonproteobacteria	Campylobacterales	1159043	Campylobacterota	Helicobacter	Helicobacter pylori	Gram-
Helicobacter pylori GAM252T	2529293261	Helicobacteraceae	Epsilonproteobacteria	Campylobacterales	1159042	Campylobacterota	Helicobacter	Helicobacter pylori	Gram-
Helicobacter pylori GAM265BSii	2529293262	Helicobacteraceae	Epsilonproteobacteria	Campylobacterales	1159049	Campylobacterota	Helicobacter	Helicobacter pylori	Gram-
Helicobacter pylori GAM264Ai	2529293263	Helicobacteraceae	Epsilonproteobacteria	Campylobacterales	1159048	Campylobacterota	Helicobacter	Helicobacter pylori	Gram-
Bacteroides sp. HPS0048	2529293266	Bacteroidaceae	Bacteroidia	Bacteroidales	1078089	Bacteroidota	Bacteroides	Bacteroides sp. HPS0048	Gram-		2531792823	2531792824	2531792825				2531795233|2531794809	2531794810|2531795234	2531794811|2531795235
Enterococcus faecium ERV168	2529293273	Enterococcaceae	Bacilli	Lactobacillales	1134823	Bacillota	Enterococcus	Enterococcus faecium	Gram+						2531810195	2531808685
Enterococcus faecium ERV165	2529293274	Enterococcaceae	Bacilli	Lactobacillales	1134822	Bacillota	Enterococcus	Enterococcus faecium	Gram+						2531812029	2531813396	2531812038	2531812037|2531812035	2531812036																		2531811433	2531811432
Enterococcus faecium ERV99	2529293277	Enterococcaceae	Bacilli	Lactobacillales	1134827	Bacillota	Enterococcus	Enterococcus faecium	Gram+						2531820228	2531820204																					2531818901	2531818902
Enterococcus faecium ERV69	2529293278	Enterococcaceae	Bacilli	Lactobacillales	1134826	Bacillota	Enterococcus	Enterococcus faecium	Gram+						2531822074	2531822815
Enterococcus faecium P1137	2529293279	Enterococcaceae	Bacilli	Lactobacillales	1134829	Bacillota	Enterococcus	Enterococcus faecium	Gram+						2531827098	2531827075																					2531824610	2531824611
Enterococcus faecium P1123	2529293280	Enterococcaceae	Bacilli	Lactobacillales	1134828	Bacillota	Enterococcus	Enterococcus faecium	Gram+						2531827900	2531830106
Cutibacterium humerusii HL037PA3	2529293281	Propionibacteriaceae	Actinomycetes	Propionibacteriales	765124	Actinomycetota	Cutibacterium	Cutibacterium modestum	Gram+		2531833334	2531833333	2531833332	2531833335	2531831321	2531832257	2531830969	2531830968	2531830967																2531831451	2531831450
Enterocloster clostridioformis 90A6	2531839007	Lachnospiraceae	Clostridia	Lachnospirales	999406	Bacillota	Enterocloster	Enterocloster clostridioformis	Gram+											2531877368| 2531878785
Enterocloster clostridioformis 90A7	2531839008	Lachnospiraceae	Clostridia	Lachnospirales	999407	Bacillota	Enterocloster	Enterocloster clostridioformis	Gram+		2531886615	2531886614	2531886613							2531881961| 2531887116| 2531886639
Enterocloster bolteae 90A9	2531839009	Lachnospiraceae	Clostridia	Lachnospirales	997894	Bacillota	Enterocloster	Enterocloster bolteae	Gram+											2531891971| 2531890814
Enterocloster bolteae 90B3	2531839010	Lachnospiraceae	Clostridia	Lachnospirales	997895	Bacillota	Enterocloster	Enterocloster bolteae	Gram+		2531896793	2531896792	2531896791							2531897741| 2531896824
Enterocloster bolteae 90B7	2531839011	Lachnospiraceae	Clostridia	Lachnospirales	997896	Bacillota	Enterocloster	Enterocloster bolteae	Gram+											2531902257| 2531904624| 2531900765
Enterocloster bolteae 90B8	2531839012	Lachnospiraceae	Clostridia	Lachnospirales	997897	Bacillota	Enterocloster	Enterocloster bolteae	Gram+		2531908307	2531908306	2531908305							2531905235| 2531910487| 2531908338
Clostridium butyricum 60E.3	2531839013	Clostridiaceae	Clostridia	Eubacteriales	997898	Bacillota	Clostridium	Clostridium butyricum	Gram+							2531913706													2531912497
Enterocloster clostridioformis 90A1	2531839014	Lachnospiraceae	Clostridia	Lachnospirales	999403	Bacillota	Enterocloster	Enterocloster clostridioformis	Gram+											2531917982| 2531918892									2531918126
Enterocloster clostridioformis 90A3	2531839015	Lachnospiraceae	Clostridia	Lachnospirales	999404	Bacillota	Enterocloster	Enterocloster clostridioformis	Gram+											2531921590| 2531924967
Enterocloster clostridioformis 90A4	2531839016	Lachnospiraceae	Clostridia	Lachnospirales	999405	Bacillota	Enterocloster	Enterocloster clostridioformis	Gram+											2531927341| 2531929821
Enterococcus faecium P1140	2531839071	Enterococcaceae	Bacilli	Lactobacillales	1134831	Bacillota	Enterococcus	Enterococcus faecium	Gram+						2532136605	2532136033
Enterococcus faecium P1139	2531839072	Enterococcaceae	Bacilli	Lactobacillales	1134830	Bacillota	Enterococcus	Enterococcus faecium	Gram+						2532140663	2532138676	2532140673	2532140672|2532140670	2532140671																		2532138472	2532138471
Enterococcus faecium ERV38	2531839075	Enterococcaceae	Bacilli	Lactobacillales	1134825	Bacillota	Enterococcus	Enterococcus faecium	Gram+						2532147926	2532149917	2532147917	2532147918|2532147920	2532147919																		2532147259	2532147260
Enterococcus faecium ERV26	2531839076	Enterococcaceae	Bacilli	Lactobacillales	1134824	Bacillota	Enterococcus	Enterococcus faecium	Gram+						2532152007	2532152736
Enterococcus faecium 504	2531839106	Enterococcaceae	Bacilli	Lactobacillales	1134805	Bacillota	Enterococcus	Enterococcus faecium	Gram+						2532265940	2532265915	2532265949	2532265948|2532265946	2532265947																		2532264341	2532264342
Enterococcus faecium 503	2531839107	Enterococcaceae	Bacilli	Lactobacillales	1134804	Bacillota	Enterococcus	Enterococcus faecium	Gram+						2532268436	2532269011	2532268426	2532268427|2532268429	2532268428																		2532267333	2532267332
Enterococcus faecium TX1337RF	2531839108	Enterococcaceae	Bacilli	Lactobacillales	1134802	Bacillota	Enterococcus	Enterococcus faecium	Gram+						2532270213	2532270236	2532270209	2532270212|2532270210	2532270211																		2532271699	2532271698
Enterococcus faecalis R508	2531839109	Enterococcaceae	Bacilli	Lactobacillales	1134801	Bacillota	Enterococcus	Enterococcus faecalis	Gram+		2532273894	2532273895	2532273896		2532273403	2532273391	2532273398	2532273399|2532273401	2532273400																		2532274793	2532274794
Enterococcus faecium 510	2531839110	Enterococcaceae	Bacilli	Lactobacillales	1134809	Bacillota	Enterococcus	Enterococcus faecium	Gram+						2532275774	2532276286	2532275783	2532275782|2532275780	2532275781																		2532276956	2532276957
Enterococcus faecium 509	2531839111	Enterococcaceae	Bacilli	Lactobacillales	1134808	Bacillota	Enterococcus	Enterococcus faecium	Gram+						2532278791	2532281716
Enterococcus faecium 506	2531839112	Enterococcaceae	Bacilli	Lactobacillales	1134807	Bacillota	Enterococcus	Enterococcus faecium	Gram+						2532284285	2532284310																					2532282445	2532282444
Enterococcus faecium 505	2531839113	Enterococcaceae	Bacilli	Lactobacillales	1134806	Bacillota	Enterococcus	Enterococcus faecium	Gram+						2532286692	2532286670	2532286696	2532286693|2532286695	2532286694																		2532284900	2532284899
Enterococcus faecium 513	2531839114	Enterococcaceae	Bacilli	Lactobacillales	1134811	Bacillota	Enterococcus	Enterococcus faecium	Gram+						2532289008	2532289660
Enterococcus faecium 511	2531839115	Enterococcaceae	Bacilli	Lactobacillales	1134810	Bacillota	Enterococcus	Enterococcus faecium	Gram+						2532290959	2532291875	2532290969	2532290966|2532290968	2532290967																		2532291386	2532291385
Escherichia coli MS 85-1	2531839146	Enterobacteriaceae	Gammaproteobacteria	Enterobacterales	679202	Pseudomonadota	Escherichia	Escherichia coli	Gram-		2532402117	2532402118	2532402119	2532402116		2532402619	2532402751|2532401864	2532402752|2532401865|2532401863	2532402753|2532401862	2532399770| 2532400877| 2532401412				2532401191	2532401192	2532401404	2532401405		2532399561	2532400874	2532400875				2532399650	2532399649
Escherichia coli MS 79-10	2531839147	Enterobacteriaceae	Gammaproteobacteria	Enterobacterales	796392	Pseudomonadota	Escherichia	Escherichia coli	Gram-							2532405652				2532405769| 2532408557| 2532410072| 2532405377
Fusobacterium polymorphum F0401	2531839191	Fusobacteriaceae	Fusobacteriia	Fusobacteriales	693991	Fusobacteriota	Fusobacterium	Fusobacterium polymorphum	Gram-																				2532578832								2532578369	2532578370
Cutibacterium acnes HL045PA1	2531839222	Propionibacteriaceae	Actinomycetes	Propionibacteriales	765068	Actinomycetota	Cutibacterium	Cutibacterium acnes	Gram+						2532693182	2532691125
Cutibacterium acnes HL013PA1	2531839223	Propionibacteriaceae	Actinomycetes	Propionibacteriales	765069	Actinomycetota	Cutibacterium	Cutibacterium acnes	Gram+						2532695057	2532694641
Cutibacterium acnes HL020PA1	2531839225	Propionibacteriaceae	Actinomycetes	Propionibacteriales	765065	Actinomycetota	Cutibacterium	Cutibacterium acnes	Gram+		2532703090	2532703089	2532703088	2532703091	2532704388	2532703408	2532705069	2532705070	2532705071																2532704493	2532704492
Cutibacterium acnes HL053PA2	2531839226	Propionibacteriaceae	Actinomycetes	Propionibacteriales	765067	Actinomycetota	Cutibacterium	Cutibacterium acnes	Gram+		2532706045	2532706046	2532706047	2532706044	2532707043	2532706629	2532705344	2532705343	2532705342																2532707150	2532707149
Phocaeicola massiliensis B84634	2531839249	Bacteroidaceae	Bacteroidia	Bacteroidales	1121098	Bacteroidota	Phocaeicola	Phocaeicola massiliensis	Gram-
Bacteroides salyersiae DSM 18765	2531839250	Bacteroidaceae	Bacteroidia	Bacteroidales	1121101	Bacteroidota	Bacteroides	Bacteroides salyersiae	Gram-
Enterococcus faecalis TX1341	2531839255	Enterococcaceae	Bacilli	Lactobacillales	749514	Bacillota	Enterococcus	Enterococcus faecalis	Gram+						2532819304	2532819293
Enterococcus faecalis TX1302	2531839256	Enterococcaceae	Bacilli	Lactobacillales	749513	Bacillota	Enterococcus	Enterococcus faecalis	Gram+						2532822174	2532822162	2532822169	2532822172|2532822170	2532822171																		2532822742	2532822741
Enterococcus faecalis TX0645	2531839257	Enterococcaceae	Bacilli	Lactobacillales	749510	Bacillota	Enterococcus	Enterococcus faecalis	Gram+						2532824348	2532824337	2532824343	2532824344|2532824346	2532824345																		2532825258	2532825259
Enterococcus faecalis TX0312	2531839258	Enterococcaceae	Bacilli	Lactobacillales	749505	Bacillota	Enterococcus	Enterococcus faecalis	Gram+						2532829674	2532829686
Enterococcus faecalis TX0630	2531839259	Enterococcaceae	Bacilli	Lactobacillales	749508	Bacillota	Enterococcus	Enterococcus faecalis	Gram+						2532832567	2532832556	2532832562	2532832563|2532832565	2532832564																		2532831041	2532831040
Escherichia coli 4_1_47FAA	2531839265	Enterobacteriaceae	Gammaproteobacteria	Enterobacterales	1127356	Pseudomonadota	Escherichia	Escherichia coli	Gram+		2532861652	2532861651	2532861650			2532865786	2532862374|2532865141	2532862375|2532865140|2532865143	2532862376|2532865139|2532865138	2532863800| 2532861251| 2532863924|				2532864409	2532864410	2532863931	2532863930			2532861247	2532861249
Erysipelotrichaceae bacterium sp. 6_1_45	2531839268	Erysipelotrichaceae	Erysipelotrichia	Erysipelotrichales	469614	Bacillota	unclassified	Erysipelotrichaceae bacterium 6_1_45	Gram+						2532875997
Peptoanaerobacter stomatis OBRC8	2531839269	Filifactoraceae	Clostridia	Peptostreptococcales	796937	Bacillota	Peptoanaerobacter	Peptoanaerobacter stomatis	Gram+								2532882327	2532882330|2532882328	2532882329	2532881145| 2532880480
Klebsiella sp. OBRC7	2531839270	Enterobacteriaceae	Gammaproteobacteria	Enterobacterales	936565	Pseudomonadota	Klebsiella	Klebsiella sp. OBRC7	Gram-							2532885561				2532885325
Oribacterium parvum ACB8	2531839271	Lachnospiraceae	Clostridia	Lachnospirales	796945	Bacillota	Oribacterium	Oribacterium parvum	Gram+											2532890624
Prevotella sp. MSX73	2531839272	Prevotellaceae	Bacteroidia	Bacteroidales	1032506	Bacteroidota	Prevotella	Prevotella sp. MSX73	Gram-
Selenomonas sp. FOBRC9	2531839273	Selenomonadaceae	Negativicutes	Selenomonadales	936573	Bacillota	Selenomonas	Selenomonas sp. FOBRC9	Gram-																				2532894936
Selenomonas sp. FOBRC6	2531839274	Selenomonadaceae	Negativicutes	Selenomonadales	936572	Bacillota	Selenomonas	Selenomonas sp. FOBRC6	Gram-
Capnocytophaga ochracea Holt 25	2531839278	Flavobacteriaceae	Flavobacteriia	Flavobacteriales	1125719	Bacteroidota	Capnocytophaga	Capnocytophaga ochracea	Gram-																												2532915203	2532915204
Capnocytophaga sp. oral taxon 335 F0486	2531839279	Flavobacteriaceae	Flavobacteriia	Flavobacteriales	1125720	Bacteroidota	Capnocytophaga	Capnocytophaga sp. oral taxon 335	Gram-																												2532917203	2532917204
Schaalia georgiae F0490	2531839280	Actinomycetaceae	Actinomycetes	Actinomycetales	1125717	Actinomycetota	Schaalia	Schaalia georgiae	Gram+						2532918035
Massilia timonae CCUG 45783	2531839286	Oxalobacteraceae	Betaproteobacteria	Burkholderiales	883126	Pseudomonadota	Massilia	Massilia timonae	Gram-		2532942794	2532942795	2532942796	2532942793		2532939853	2532939183	2532939184	2532939185	2532939335															2532939320	2532939319
Falseniella ignava CCUG 37419	2531839287	Aerococcaceae	Bacilli	Lactobacillales	883112	Bacillota	Falseniella	Falseniella ignava	Gram+
Facklamia hominis CCUG 36813	2531839288	Aerococcaceae	Bacilli	Lactobacillales	883111	Bacillota	Facklamia	Facklamia hominis	Gram+
Bacteroides cellulosilyticus CL02T12C19	2531839301	Bacteroidaceae	Bacteroidia	Bacteroidales	997874	Bacteroidota	Bacteroides	Bacteroides cellulosilyticus	Gram-		2532996241	2532996242	2532996243
Atopobium minutum 10063974	2531839302	Atopobiaceae	Coriobacteriia	Coriobacteriales	997872	Actinomycetota	Atopobium	Atopobium minutum	Gram+							2533000724
Bacteroides caccae CL03T12C61	2531839303	Bacteroidaceae	Bacteroidia	Bacteroidales	997873	Bacteroidota	Bacteroides	Bacteroides caccae	Gram-
Bacteroides fragilis CL03T12C07	2531839304	Bacteroidaceae	Bacteroidia	Bacteroidales	997879	Bacteroidota	Bacteroides	Bacteroides fragilis	Gram-
Bacteroides fragilis CL07T00C01	2531839305	Bacteroidaceae	Bacteroidia	Bacteroidales	997882	Bacteroidota	Bacteroides	Bacteroides fragilis	Gram-
Bacteroides fragilis CL07T12C05	2531839306	Bacteroidaceae	Bacteroidia	Bacteroidales	997883	Bacteroidota	Bacteroides	Bacteroides fragilis	Gram-		2533016108	2533016109	2533016110				2533019492	2533019491	2533019490
Phocaeicola dorei CL02T12C06	2531839307	Bacteroidaceae	Bacteroidia	Bacteroidales	997876	Bacteroidota	Phocaeicola	Phocaeicola dorei	Gram-		2533023569	2533023568	2533023567
Phocaeicola dorei CL03T12C01	2531839308	Bacteroidaceae	Bacteroidia	Bacteroidales	997877	Bacteroidota	Phocaeicola	Phocaeicola dorei	Gram-		2533025675	2533025676	2533025677
Cutibacterium acnes HL087PA2	2531839313	Propionibacteriaceae	Actinomycetes	Propionibacteriales	765082	Actinomycetota	Cutibacterium	Cutibacterium acnes	Gram+		2533047911	2533047912	2533047913	2533047910	2533047285	2533046196	2533046739	2533046738	2533046737																2533047177	2533047178
Cutibacterium acnes HL087PA3	2531839314	Propionibacteriaceae	Actinomycetes	Propionibacteriales	765083	Actinomycetota	Cutibacterium	Cutibacterium acnes	Gram+		2533049031	2533049032	2533049033	2533049030	2533050566	2533048722	2533049658	2533049659	2533049660																2533050671	2533050669
Cutibacterium acnes HL110PA4	2531839315	Propionibacteriaceae	Actinomycetes	Propionibacteriales	765080	Actinomycetota	Cutibacterium	Cutibacterium acnes	Gram+		2533052490	2533052491	2533052492	2533052489	2533051829	2533052789	2533053056	2533053057	2533053058																2533051935	2533051934
Cutibacterium acnes HL087PA1	2531839316	Propionibacteriaceae	Actinomycetes	Propionibacteriales	765081	Actinomycetota	Cutibacterium	Cutibacterium acnes	Gram+		2533054356	2533054357	2533054358	2533054355	2533055569	2533054120	2533054935	2533054934	2533054933																2533055675	2533055674
Cutibacterium acnes HL092PA1	2531839317	Propionibacteriaceae	Actinomycetes	Propionibacteriales	765086	Actinomycetota	Cutibacterium	Cutibacterium acnes	Gram+						2533057907	2533057139
Cutibacterium acnes HL083PA1	2531839318	Propionibacteriaceae	Actinomycetes	Propionibacteriales	765087	Actinomycetota	Cutibacterium	Cutibacterium acnes	Gram+		2533059286	2533059287	2533059288	2533059285	2533061111	2533060398	2533059518	2533059519	2533059520																2533061001	2533061003
Cutibacterium acnes HL060PA1	2531839319	Propionibacteriaceae	Actinomycetes	Propionibacteriales	765084	Actinomycetota	Cutibacterium	Cutibacterium acnes	Gram+		2533062306	2533062307	2533062308	2533062305	2533063665	2533061490	2533061734	2533061735	2533061736																2533063558	2533063560
Cutibacterium acnes HL038PA1	2531839320	Propionibacteriaceae	Actinomycetes	Propionibacteriales	765085	Actinomycetota	Cutibacterium	Cutibacterium acnes	Gram+						2533065883	2533066278
Cutibacterium acnes HL083PA2	2531839323	Propionibacteriaceae	Actinomycetes	Propionibacteriales	765088	Actinomycetota	Cutibacterium	Cutibacterium acnes	Gram+						2533071947	2533070582
Cutibacterium acnes HL025PA1	2531839324	Propionibacteriaceae	Actinomycetes	Propionibacteriales	765089	Actinomycetota	Cutibacterium	Cutibacterium acnes	Gram+						2533074444	2533074977
Selenomonas sp. F0473	2531839338	Selenomonadaceae	Negativicutes	Selenomonadales	999423	Bacillota	Selenomonas	Selenomonas sp. F0473	Gram+																				2533130877
Selenomonas sp. oral taxon 138 F0429	2531839339	Selenomonadaceae	Negativicutes	Selenomonadales	1127695	Bacillota	Selenomonas	Selenomonas sp. oral taxon 138	Gram+
Streptococcus pseudopneumoniae SK1069, CCUG 49455	2531839346	Streptococcaceae	Bacilli	Lactobacillales	889205	Bacillota	Streptococcus	Streptococcus pseudopneumoniae	Gram+
Staphylococcus aureus aureus MRSA177	2531839347	Staphylococcaceae	Bacilli	Bacillales	754026	Bacillota	Staphylococcus	Staphylococcus aureus	Gram+		2533151852	2533151853	2533151854	2533151851	2533152945		2533152936	2533152939|2533152937	2533152938	2533150986| 2533152163| 2533151660										2533150990	2533150989						2533153687	2533153688
Klebsiella michiganensis 10-5242	2531839401	Enterobacteriaceae	Gammaproteobacteria	Enterobacterales	1134687	Pseudomonadota	Klebsiella	Klebsiella michiganensis	Gram-		2533380229	2533380228	2533380227			2533383967	2533382743|2533382238	2533382744|2533382237|2533382239	2533382745|2533382240	2533380090				2533383520	2533383521	2533384744	2533384743		2533380729	2533380087	2533380088				2533381982	2533381983
Klebsiella oxytoca 10-5243	2531839402	Enterobacteriaceae	Gammaproteobacteria	Enterobacterales	883118	Pseudomonadota	Klebsiella	Klebsiella oxytoca	Gram-		2533385737	2533385736	2533385735			2533389534	2533388262|2533387712	2533388263|2533387711|2533387713	2533388264|2533387714	2533385596				2533389113	2533389114	2533389968	2533389969			2533385593	2533385594				2533387466	2533387467
Raoultella ornithinolytica 10-5246	2531839403	Enterobacteriaceae	Gammaproteobacteria	Enterobacterales	883121	Pseudomonadota	Raoultella	Raoultella ornithinolytica	Gram-		2533392045	2533392044	2533392043			2533395673| 2533393010	2533394558|2533394043	2533394559|2533394042|2533394044	2533394560|2533394045	2533391925				2533395244	2533395245	2533391339	2533391338			2533391922|2533393913	2533391923|2533393912				2533393729	2533393730
Klebsiella oxytoca 10-5245	2531839404	Enterobacteriaceae	Gammaproteobacteria	Enterobacterales	883120	Pseudomonadota	Klebsiella	Klebsiella oxytoca	Gram-							2533401050				2533396983
Cutibacterium acnes HL036PA3	2531839421	Propionibacteriaceae	Actinomycetes	Propionibacteriales	765108	Actinomycetota	Cutibacterium	Cutibacterium acnes	Gram+		2533459024	2533459023	2533459022	2533459025	2533460271	2533459344	2533460825	2533460826	2533460827																2533460162	2533460164
Cutibacterium humerusii HL044PA1	2531839422	Propionibacteriaceae	Actinomycetes	Propionibacteriales	765109	Actinomycetota	Cutibacterium	Cutibacterium modestum	Gram+						2533463123	2533461934
Cutibacterium acnes HL030PA2	2531839423	Propionibacteriaceae	Actinomycetes	Propionibacteriales	765104	Actinomycetota	Cutibacterium	Cutibacterium acnes	Gram+		2533464504	2533464503	2533464502	2533464505	2533465919	2533463842	2533465459	2533465460	2533465461																2533466027	2533466026
Cutibacterium acnes HL001PA1	2531839424	Propionibacteriaceae	Actinomycetes	Propionibacteriales	765105	Actinomycetota	Cutibacterium	Cutibacterium acnes	Gram+		2533468477	2533468478	2533468479	2533468476	2533467722	2533468998	2533467141	2533467140	2533467139																2533467833	2533467832
Cutibacterium acnes HL036PA1	2531839425	Propionibacteriaceae	Actinomycetes	Propionibacteriales	765106	Actinomycetota	Cutibacterium	Cutibacterium acnes	Gram+		2533469818	2533469817	2533469816	2533469819	2533471067	2533470223	2533469246	2533469247	2533469248																2533470959	2533470961
Cutibacterium acnes HL036PA2	2531839426	Propionibacteriaceae	Actinomycetes	Propionibacteriales	765107	Actinomycetota	Cutibacterium	Cutibacterium acnes	Gram+		2533471884	2533471885	2533471886	2533471883	2533473609	2533472692	2533472798	2533472797	2533472796																2533473712	2533473711
Cutibacterium acnes HL050PA1	2531839427	Propionibacteriaceae	Actinomycetes	Propionibacteriales	765100	Actinomycetota	Cutibacterium	Cutibacterium acnes	Gram+		2533476373	2533476374	2533476375	2533476372	2533475494	2533474621	2533474326	2533474325	2533474324																2533475384	2533475385
Cutibacterium acnes HL050PA2	2531839428	Propionibacteriaceae	Actinomycetes	Propionibacteriales	765101	Actinomycetota	Cutibacterium	Cutibacterium acnes	Gram+						2533478829	2533476877
Cutibacterium acnes HL050PA3	2531839429	Propionibacteriaceae	Actinomycetes	Propionibacteriales	765102	Actinomycetota	Cutibacterium	Cutibacterium acnes	Gram+		2533479668	2533479669	2533479670	2533479667	2533481379	2533480332	2533480700	2533480701	2533480702																2533481272	2533481274
Cutibacterium acnes HL030PA1	2531839430	Propionibacteriaceae	Actinomycetes	Propionibacteriales	765103	Actinomycetota	Cutibacterium	Cutibacterium acnes	Gram+						2533484422	2533483364
Streptococcus sp. F0441	2531839452	Streptococcaceae	Bacilli	Lactobacillales	999424	Bacillota	Streptococcus	Streptococcus sp. F0441	Gram+						2533579644																	2533578677	2533578676	2533578678			2533579394	2533579393
Streptococcus sp. F0442	2531839453	Streptococcaceae	Bacilli	Lactobacillales	999425	Bacillota	Streptococcus	Streptococcus sp. F0442	Gram+						2533580654																	2533580255	2533580256	2533580254			2533581338	2533581339
Haemophilus haemolyticus AQ/3273, ATCC 33390	2531839471	Pasteurellaceae	Gammaproteobacteria	Pasteurellales	1095742	Pseudomonadota	Haemophilus	Haemophilus haemolyticus	Gram-																				2533655316
Haemophilus paraphrohaemolyticus HK411, NCTC 10670	2531839472	Pasteurellaceae	Gammaproteobacteria	Pasteurellales	1095743	Pseudomonadota	Haemophilus	Haemophilus paraphrohaemolyticus	Gram-
Bifidobacterium longum longum 2-2B	2531839495	Bifidobacteriaceae	Actinomycetes	Bifidobacteriales	1161745	Actinomycetota	Bifidobacterium	Bifidobacterium longum	Gram+							2533763954| 2533764239
Gardnerella vaginalis 315-A	2531839498	Bifidobacteriaceae	Actinomycetes	Bifidobacteriales	879307	Actinomycetota	Gardnerella	Gardnerella vaginalis	Gram+							2533775006
Veillonella parvula ACS-068-V-Sch12	2531839533	Veillonellaceae	Negativicutes	Veillonellales	768727	Bacillota	Veillonella	Veillonella parvula	Gram-											2533890592
Streptococcus urinalis FB127-CNA-2	2531839534	Streptococcaceae	Bacilli	Lactobacillales	883168	Bacillota	Streptococcus	Streptococcus urinalis	Gram+							2533894030	2533894522	2533894521|2533894519	2533894520																		2533892900	2533892901
Actinomyces naeslundii Howell 279, ATCC 12104	2531839542	Actinomycetaceae	Actinomycetes	Actinomycetales	1115803	Actinomycetota	Actinomyces	Actinomyces naeslundii	Gram+						2533928036		2533926706	2533926705	2533926704	2533926264
Haemophilus sputorum sp.nov. HK2154	2531839543	Pasteurellaceae	Gammaproteobacteria	Pasteurellales	1078483	Pseudomonadota	Haemophilus	Haemophilus sputorum	Gram-											2533929277
Fusobacterium necrophorum Fnf1007	2531839544	Fusobacteriaceae	Fusobacteriia	Fusobacteriales	1161424	Fusobacteriota	Fusobacterium	Fusobacterium necrophorum	Gram-																												2533932415	2533932414
Streptococcus anginosus SK1138	2531839545	Streptococcaceae	Bacilli	Lactobacillales	1161422	Bacillota	Streptococcus	Streptococcus anginosus	Gram+						2533932686																	2533933625	2533933624	2533933626			2533933567	2533933566
Streptococcus oralis SK304	2531839546	Streptococcaceae	Bacilli	Lactobacillales	1161421	Bacillota	Streptococcus	Streptococcus oralis	Gram+						2533936476
Staphylococcus aureus aureus MRSA131	2531839551	Staphylococcaceae	Bacilli	Bacillales	754025	Bacillota	Staphylococcus	Staphylococcus aureus	Gram+						2533957372					2533957561| 2533955222| 2533956389
Capnocytophaga sp. oral taxon 324 F0483	2531839552	Flavobacteriaceae	Flavobacteriia	Flavobacteriales	1127691	Bacteroidota	Capnocytophaga	Capnocytophaga sp. oral taxon 324	Gram-																												2533957908	2533957907
Escherichia coli MS 60-1	2531839554	Enterobacteriaceae	Gammaproteobacteria	Enterobacterales	749530	Pseudomonadota	Escherichia	Escherichia coli	Gram-		2533970905	2533970904	2533970903	2533970906		2533968493	2533966829|2533967331	2533966830|2533967330|2533967332	2533966831|2533967329	2533970373| 2533968952				2533966097	2533966096	2533968960	2533968959			2533970376	2533970375				2533967727	2533967728
Streptococcus sanguinis SK340	2531839556	Streptococcaceae	Bacilli	Lactobacillales	888814	Bacillota	Streptococcus	Streptococcus sanguinis	Gram+																							2533977561	2533977562	2533977560
Streptococcus sanguinis SK353	2531839557	Streptococcaceae	Bacilli	Lactobacillales	888815	Bacillota	Streptococcus	Streptococcus sanguinis	Gram+
Streptococcus sanguinis SK72	2531839558	Streptococcaceae	Bacilli	Lactobacillales	888809	Bacillota	Streptococcus	Streptococcus sanguinis	Gram+																							2533981833	2533981832	2533981834			2533981750	2533981751
Streptococcus sanguinis SK115	2531839559	Streptococcaceae	Bacilli	Lactobacillales	888810	Bacillota	Streptococcus	Streptococcus sanguinis	Gram+																							2533984074	2533984075	2533984073			2533984154	2533984153
Streptococcus sanguinis SK1	2531839560	Streptococcaceae	Bacilli	Lactobacillales	888807	Bacillota	Streptococcus	Streptococcus sanguinis	Gram+
Streptococcus sanguinis SK49	2531839561	Streptococcaceae	Bacilli	Lactobacillales	888808	Bacillota	Streptococcus	Streptococcus sanguinis	Gram+
Streptococcus sanguinis SK330	2531839562	Streptococcaceae	Bacilli	Lactobacillales	888813	Bacillota	Streptococcus	Streptococcus sanguinis	Gram+						2533991953																	2533991023	2533991024	2533991022			2533991110	2533991109
Streptococcus sanguinis SK150	2531839563	Streptococcaceae	Bacilli	Lactobacillales	888811	Bacillota	Streptococcus	Streptococcus sanguinis	Gram+																							2533994125	2533994126	2533994124			2533994210	2533994209
Streptococcus sanguinis SK160	2531839564	Streptococcaceae	Bacilli	Lactobacillales	888812	Bacillota	Streptococcus	Streptococcus sanguinis	Gram+																							2533996633	2533996632	2533996634
Cutibacterium acnes SK182B-JCVI	2531839572	Propionibacteriaceae	Actinomycetes	Propionibacteriales	1051006	Actinomycetota	Cutibacterium	Cutibacterium namnetense	Gram+		2534026009	2534026010	2534026011	2534026008	2534024353	2534024824	2534023945	2534023946	2534023947																2534024444	2534024443
Sutterella wadsworthensis 2_1_59BFAA	2531839589	Sutterellaceae	Betaproteobacteria	Burkholderiales	742823	Pseudomonadota	Sutterella	Sutterella wadsworthensis	Gram-		2534114468	2534114469	2534114470																2534114727
Streptococcus pneumoniae PNI0427	2531839594	Streptococcaceae	Bacilli	Lactobacillales	1159101	Bacillota	Streptococcus	Streptococcus pneumoniae	Gram+
Streptococcus pneumoniae PNI0446	2531839595	Streptococcaceae	Bacilli	Lactobacillales	1159102	Bacillota	Streptococcus	Streptococcus pneumoniae	Gram+																							2534135070	2534135071	2534135069			2534136173	2534136174
Streptococcus pneumoniae PNI0009	2531839596	Streptococcaceae	Bacilli	Lactobacillales	1159091	Bacillota	Streptococcus	Streptococcus pneumoniae	Gram+
Streptococcus pneumoniae PNI0360	2531839597	Streptococcaceae	Bacilli	Lactobacillales	1159100	Bacillota	Streptococcus	Streptococcus pneumoniae	Gram+
Streptococcus pneumoniae PNI0076	2531839598	Streptococcaceae	Bacilli	Lactobacillales	1159093	Bacillota	Streptococcus	Streptococcus pneumoniae	Gram+																							2534142073	2534142074	2534142072			2534142009	2534142008
Streptococcus pneumoniae PNI0010	2531839599	Streptococcaceae	Bacilli	Lactobacillales	1159092	Bacillota	Streptococcus	Streptococcus pneumoniae	Gram+
Streptococcus pneumoniae PNI0199	2531839600	Streptococcaceae	Bacilli	Lactobacillales	1159098	Bacillota	Streptococcus	Streptococcus pneumoniae	Gram+																							2534148045	2534148044	2534148046			2534147088	2534147087
Streptococcus pneumoniae PNI0153	2531839601	Streptococcaceae	Bacilli	Lactobacillales	1159094	Bacillota	Streptococcus	Streptococcus pneumoniae	Gram+																							2534148699	2534148700	2534148698			2534149998	2534149997
Enterococcus faecium P1986	2531839618	Enterococcaceae	Bacilli	Lactobacillales	1134833	Bacillota	Enterococcus	Enterococcus faecium	Gram+						2534196363	2534196340	2534196381	2534196380|2534196378	2534196379																		2534194291	2534194290
Klebsiella pneumoniae WGLW1	2531839623	Enterobacteriaceae	Gammaproteobacteria	Enterobacterales	1203544	Pseudomonadota	Klebsiella	Klebsiella pneumoniae	Gram-		2534220223	2534220224	2534220225			2534216679	2534217881|2534218317	2534217880|2534218316|2534218318	2534217879|2534218315	2534219926| 2534220356| 2534221824				2534217088	2534217087	2534221040	2534221041			2534220359	2534220358				2534218612	2534218611
Achromobacter xylosoxidans C54	2531839683	Alcaligenaceae	Betaproteobacteria	Burkholderiales	562971	Pseudomonadota	Achromobacter	Achromobacter xylosoxidans	Gram-							2534470515				2534471176
Brevundimonas diminuta 470-4	2531839707	Caulobacteraceae	Alphaproteobacteria	Caulobacterales	1035191	Pseudomonadota	Brevundimonas	Brevundimonas diminuta	Gram-		2534534496	2534534494	2534534493			2534536190				2534535821															2534534275	2534534277
Parabacteroides merdae CL09T00C40	2534681605	Tannerellaceae	Bacteroidia	Bacteroidales	999421	Bacteroidota	Parabacteroides	Parabacteroides merdae	Gram+
Streptococcus pneumoniae PCS8106	2534681670	Streptococcaceae	Bacilli	Lactobacillales	1159081	Bacillota	Streptococcus	Streptococcus pneumoniae	Gram+																							2534969549	2534969550	2534969548			2534970881	2534970882
Streptococcus pneumoniae PNI0008	2534681671	Streptococcaceae	Bacilli	Lactobacillales	1159090	Bacillota	Streptococcus	Streptococcus pneumoniae	Gram+
Anaerostipes hadrus comb. nov. VPI 82-52, DSM 3319	2534681714	Lachnospiraceae	Clostridia	Lachnospirales	649757	Bacillota	Anaerostipes	Anaerostipes hadrus	Gram+
Escherichia coli MS 117-3	2534681742	Enterobacteriaceae	Gammaproteobacteria	Enterobacterales	749539	Pseudomonadota	Escherichia	Escherichia coli	Gram-							2535279766				2535280184| 2535277772| 2535278793| 2535280572
Escherichia coli MS 110-3	2534681743	Enterobacteriaceae	Gammaproteobacteria	Enterobacterales	749536	Pseudomonadota	Escherichia	Escherichia coli	Gram-		2535285313	2535285314	2535285315	2535285312		2535286916	2535287532|2535286712	2535287531|2535286711|2535286713	2535287530|2535286710	2535284737| 2535287354				2535286471	2535286470	2535287346	2535287347			2535284734	2535284735				2535285845	2535285844
Escherichia coli MS 16-3	2534681744	Enterobacteriaceae	Gammaproteobacteria	Enterobacterales	749542	Pseudomonadota	Escherichia	Escherichia coli	Gram-		2535289647	2535289648	2535289649	2535289646		2535292034	2534681744|2535289463	2535290209|2535289462|2535289464	2535290208|2535289465	2535290607| 2535288558| 2535290473				2535293020	2535293019	2535290466	2535290467			2535288561	2535288560				2535292364	2535292365
Escherichia coli MS 153-1	2534681745	Enterobacteriaceae	Gammaproteobacteria	Enterobacterales	749541	Pseudomonadota	Escherichia	Escherichia coli	Gram-		2535296886	2535296885	2535296884	2535296887		2535296084	2535294419	2535294418|2535294420	2535294417	2535293683| 2535295500				2535297311	2535297310	2535295492	2535295493			2535293686	2535293685				2535298616	2535298617
Cutibacterium humerusii HL037PA2	2534681797	Propionibacteriaceae	Actinomycetes	Propionibacteriales	765123	Actinomycetota	Cutibacterium	Cutibacterium modestum	Gram+		2535523914	2535523913	2535523912	2535523915	2535521707	2535522698	2535522479	2535522480	2535522481																2535521840	2535521839
Cutibacterium acnes HL037PA1	2534681798	Propionibacteriaceae	Actinomycetes	Propionibacteriales	765122	Actinomycetota	Cutibacterium	Cutibacterium acnes	Gram+						2535526358	2535525325
Haemophilus parainfluenzae HK2019	2534681801	Pasteurellaceae	Gammaproteobacteria	Pasteurellales	1095746	Pseudomonadota	Haemophilus	Haemophilus parainfluenzae	Gram-											2535533206									2535532933
Haemophilus parainfluenzae HK262	2534681804	Pasteurellaceae	Gammaproteobacteria	Pasteurellales	1095745	Pseudomonadota	Haemophilus	Haemophilus parainfluenzae	Gram-											2535540674
Staphylococcus epidermidis NIHLM095	2534681809	Staphylococcaceae	Bacilli	Bacillales	979199	Bacillota	Staphylococcus	Staphylococcus epidermidis	Gram+						2535551186					2535552284| 2535552788| 2535551983
Staphylococcus epidermidis NIHLM087	2534681811	Staphylococcaceae	Bacilli	Bacillales	979201	Bacillota	Staphylococcus	Staphylococcus epidermidis	Gram+						2535559197					2535559900| 2535558746| 2535559792
Staphylococcus epidermidis NIHLM088	2534681812	Staphylococcaceae	Bacilli	Bacillales	979200	Bacillota	Staphylococcus	Staphylococcus epidermidis	Gram+						2535561574		2535561586|2535561775	2535561778|2535561583|2535561776|2535561585	2535561777|2535561584	2535562123| 2535560506| 2535561811										2535562120	2535562121
Staphylococcus epidermidis NIHLM067	2534681813	Staphylococcaceae	Bacilli	Bacillales	979203	Bacillota	Staphylococcus	Staphylococcus epidermidis	Gram+						2535564151		2535563040|2535564139	2535563037|2535563039|2535564142|2535564140	2535564141|2535563038	2535564472| 2535563480| 2535563003									2535564381	2535564469	2535564470
Staphylococcus epidermidis NIHLM070	2534681814	Staphylococcaceae	Bacilli	Bacillales	979202	Bacillota	Staphylococcus	Staphylococcus epidermidis	Gram+						2535566311					2535565303| 2535566888| 2535565647
Porphyromonas sp. oral taxon 279 F0450	2534681816	Porphyromonadaceae	Bacteroidia	Bacteroidales	1125723	Bacteroidota	Porphyromonas	Porphyromonas sp. oral taxon 279	Gram-
Fusobacterium periodonticum D10	2534681820	Fusobacteriaceae	Fusobacteriia	Fusobacteriales	620833	Fusobacteriota	Fusobacterium	Fusobacterium periodonticum	Gram-
Enterococcus faecalis TX1346	2534681821	Enterococcaceae	Bacilli	Lactobacillales	749516	Bacillota	Enterococcus	Enterococcus faecalis	Gram+						2535582830	2535582818
Enterococcus faecalis TX1342	2534681822	Enterococcaceae	Bacilli	Lactobacillales	749515	Bacillota	Enterococcus	Enterococcus faecalis	Gram+						2535585965	2535585976	2535585970	2535585967|2535585969	2535585968																		2535587036	2535587035
Enterococcus faecalis TX1467	2534681823	Enterococcaceae	Bacilli	Lactobacillales	749517	Bacillota	Enterococcus	Enterococcus faecalis	Gram+						2535588719	2535588730	2535588724	2535588723|2535588721	2535588722
Veillonella ratti ACS-216-V-Col6b	2534681824	Veillonellaceae	Negativicutes	Veillonellales	883156	Bacillota	Veillonella	Veillonella seminalis	Gram-
Staphylococcus epidermidis BVS058A4	2534681825	Staphylococcaceae	Bacilli	Bacillales	883130	Bacillota	Staphylococcus	Staphylococcus epidermidis	Gram+						2535595386		2535595720|2535595374	2535595377|2535595719|2535595375|2535595717	2535595376|2535595718	2535595547| 2535594798| 2535595684										2535595544	2535595545						2535594275	2535594276
Bacteroides oleiciplenus YIT 12058	2534681837	Bacteroidaceae	Bacteroidia	Bacteroidales	742727	Bacteroidota	Bacteroides	Bacteroides oleiciplenus	Gram-
Bacteroides uniformis CL03T12C37	2534681854	Bacteroidaceae	Bacteroidia	Bacteroidales	997890	Bacteroidota	Bacteroides	Bacteroides uniformis	Gram-
Lacticaseibacillus rhamnosus ATCC 21052	2534681855	Lactobacillaceae	Bacilli	Lactobacillales	1002365	Bacillota	Lacticaseibacillus	Lacticaseibacillus rhamnosus	Gram+						2535715855	2535713228	2535715755|2535714068	2535715754|2535714065|2535714067	2535715753|2535714066
Streptococcus parasanguinis F0449	2534681879	Streptococcaceae	Bacilli	Lactobacillales	1095733	Bacillota	Streptococcus	Streptococcus parasanguinis	Gram+						2535835977																	2535836727	2535836726	2535836728			2535837470	2535837469
Staphylococcus epidermidis NIH04008	2534681880	Staphylococcaceae	Bacilli	Bacillales	979222	Bacillota	Staphylococcus	Staphylococcus epidermidis	Gram+						2535838291					2535839011| 2535839366| 2535838174
Staphylococcus epidermidis NIH05001	2534681881	Staphylococcaceae	Bacilli	Bacillales	979221	Bacillota	Staphylococcus	Staphylococcus epidermidis	Gram+						2535842516		2535841069|2535842528	2535842525|2535841068|2535842527|2535841066	2535842526|2535841067	2535842234| 2535840918| 2535841031										2535842231	2535842232
Staphylococcus epidermidis NIH05005	2534681882	Staphylococcaceae	Bacilli	Bacillales	979220	Bacillota	Staphylococcus	Staphylococcus epidermidis	Gram+						2535844790					2535844326| 2535844437| 2535844032
Staphylococcus epidermidis NIHLM001	2534681883	Staphylococcaceae	Bacilli	Bacillales	979219	Bacillota	Staphylococcus	Staphylococcus epidermidis	Gram+						2535846698					2535846315| 2535846996| 2535847508									2535847217
Staphylococcus epidermidis NIHLM003	2534681884	Staphylococcaceae	Bacilli	Bacillales	979218	Bacillota	Staphylococcus	Staphylococcus epidermidis	Gram+						2535850125		2535849956|2535850137	2535849955|2535850134|2535849953|2535850136	2535850135|2535849954	2535848908| 2535849919| 2535849410									2535849823	2535848911	2535848910
Staphylococcus epidermidis NIHLM008	2534681885	Staphylococcaceae	Bacilli	Bacillales	979217	Bacillota	Staphylococcus	Staphylococcus epidermidis	Gram+						2535852386		2535852398|2535852694	2535852693|2535852691|2535852397|2535852395	2535852396|2535852692	2535852540| 2535852656| 2535851404									2535853191	2535852537	2535852538						2535851924	2535851923
Staphylococcus epidermidis NIHLM015	2534681886	Staphylococcaceae	Bacilli	Bacillales	979216	Bacillota	Staphylococcus	Staphylococcus epidermidis	Gram+						2535855037		2535855321|2535855049|2535855459	2535855318|2535855458|2535855046|2535855048|2535855456|2535855320	2535855047|2535855457|2535855319	2535855188| 2535854031| 2535855284									2535854587	2535855185	2535855186
Staphylococcus epidermidis NIHLM018	2534681887	Staphylococcaceae	Bacilli	Bacillales	979215	Bacillota	Staphylococcus	Staphylococcus epidermidis	Gram+						2535856395		2535856383|2535856972	2535856975|2535856386|2535856973|2535856384	2535856974|2535856385	2535856733| 2535856131| 2535857010										2535856730	2535856731
Staphylococcus epidermidis NIHLM031	2534681888	Staphylococcaceae	Bacilli	Bacillales	979214	Bacillota	Staphylococcus	Staphylococcus epidermidis	Gram+						2535860021					2535859711| 2535858763| 2535859521
Bacteroides fragilis HMW 610	2534681943	Bacteroidaceae	Bacteroidia	Bacteroidales	1073386	Bacteroidota	Bacteroides	Bacteroides fragilis	Gram-
Bacteroides fragilis HMW 615	2534681944	Bacteroidaceae	Bacteroidia	Bacteroidales	1073387	Bacteroidota	Bacteroides	Bacteroides fragilis	Gram-
Bacteroides fragilis HMW 616	2534681945	Bacteroidaceae	Bacteroidia	Bacteroidales	1073388	Bacteroidota	Bacteroides	Bacteroides fragilis	Gram+		2536076699	2536076700	2536076701				2536074862	2536074861	2536074860
Streptococcus infantis X	2534681959	Streptococcaceae	Bacilli	Lactobacillales	997830	Bacillota	Streptococcus	Streptococcus infantis	Gram+						2536131190																						2536132455	2536132454
Clostridioides difficile 002-P50-2011	2534681960	Peptostreptococcaceae	Clostridia	Peptostreptococcales	997827	Bacillota	Clostridioides	Clostridioides difficile	Gram+
Clostridioides difficile 050-P50-2011	2534681961	Peptostreptococcaceae	Clostridia	Peptostreptococcales	997828	Bacillota	Clostridioides	Clostridioides difficile	Gram+		2536140930	2536140929	2536140928
Helicobacter pylori GAM239Bi	2534681968	Helicobacteraceae	Epsilonproteobacteria	Campylobacterales	1159034	Campylobacterota	Helicobacter	Helicobacter pylori	Gram-
Helicobacter pylori GAM244Ai	2534681969	Helicobacteraceae	Epsilonproteobacteria	Campylobacterales	1159035	Campylobacterota	Helicobacter	Helicobacter pylori	Gram-
Helicobacter pylori GAM245Ai	2534681970	Helicobacteraceae	Epsilonproteobacteria	Campylobacterales	1159036	Campylobacterota	Helicobacter	Helicobacter pylori	Gram-
Helicobacter pylori GAM246Ai	2534681971	Helicobacteraceae	Epsilonproteobacteria	Campylobacterales	1159037	Campylobacterota	Helicobacter	Helicobacter pylori	Gram-
Helicobacter pylori GAM121Aii	2534681972	Helicobacteraceae	Epsilonproteobacteria	Campylobacterales	1159030	Campylobacterota	Helicobacter	Helicobacter pylori	Gram-
Helicobacter pylori GAM201Ai	2534681973	Helicobacteraceae	Epsilonproteobacteria	Campylobacterales	1159031	Campylobacterota	Helicobacter	Helicobacter pylori	Gram-
Helicobacter pylori GAM210Bi	2534681974	Helicobacteraceae	Epsilonproteobacteria	Campylobacterales	1159032	Campylobacterota	Helicobacter	Helicobacter pylori	Gram-
Helicobacter pylori GAM231Ai	2534681975	Helicobacteraceae	Epsilonproteobacteria	Campylobacterales	1159033	Campylobacterota	Helicobacter	Helicobacter pylori	Gram-
Helicobacter pylori GAM249T	2534681976	Helicobacteraceae	Epsilonproteobacteria	Campylobacterales	1159038	Campylobacterota	Helicobacter	Helicobacter pylori	Gram-																				2536176367
Helicobacter pylori GAM250AFi	2534681977	Helicobacteraceae	Epsilonproteobacteria	Campylobacterales	1159039	Campylobacterota	Helicobacter	Helicobacter pylori	Gram-
Streptococcus mitis SK569	2534681982	Streptococcaceae	Bacilli	Lactobacillales	1035187	Bacillota	Streptococcus	Streptococcus mitis	Gram+
Streptococcus cristatus SK231	2534681983	Streptococcaceae	Bacilli	Lactobacillales	889201	Bacillota	Streptococcus	Streptococcus cristatus	Gram+						2536198221																	2536198210	2536198211	2536198209			2536198011	2536198010
Streptococcus infantis SK970	2534681984	Streptococcaceae	Bacilli	Lactobacillales	1035189	Bacillota	Streptococcus	Streptococcus infantis	Gram+						2536201902
Streptococcus mitis SK1080	2534681985	Streptococcaceae	Bacilli	Lactobacillales	1008453	Bacillota	Streptococcus	Streptococcus mitis	Gram+																							2536202702	2536202701	2536202703
Streptococcus mitis SK1073	2534681986	Streptococcaceae	Bacilli	Lactobacillales	1008452	Bacillota	Streptococcus	Streptococcus mitis	Gram+						2536204743
Staphylococcus epidermidis 14.1.R1.SE	2534681987	Staphylococcaceae	Bacilli	Bacillales	1000590	Bacillota	Staphylococcus	Staphylococcus epidermidis	Gram+						2536207881		2536207893|2536207212	2536207211|2536207209|2536207892|2536207890	2536207210|2536207891	2536207576| 2536207175| 2536206739										2536207573	2536207574
Helicobacter pylori HP260Bi	2534681995	Helicobacteraceae	Epsilonproteobacteria	Campylobacterales	1159080	Campylobacterota	Helicobacter	Helicobacter pylori	Gram-																				2536249724
Cutibacterium acnes HL078PA1	2534682005	Propionibacteriaceae	Actinomycetes	Propionibacteriales	765071	Actinomycetota	Cutibacterium	Cutibacterium acnes	Gram+						2536299487	2536298627
Winkia neuii BVS029A5	2534682015	Actinomycetaceae	Actinomycetes	Actinomycetales	888439	Actinomycetota	Winkia	Winkia neuii	Gram+											2536320959| 2536319634| 2536321269| 2536319537
Schaalia turicensis ACS-279-V-Col4	2534682016	Actinomycetaceae	Actinomycetes	Actinomycetales	883077	Actinomycetota	Schaalia	Schaalia turicensis	Gram+						2536322706					2536321772																	2536321781	2536321779
Streptococcus pneumoniae PNI0164	2534682056	Streptococcaceae	Bacilli	Lactobacillales	1159096	Bacillota	Streptococcus	Streptococcus pneumoniae	Gram+
Streptococcus pneumoniae PNI0159	2534682057	Streptococcaceae	Bacilli	Lactobacillales	1159095	Bacillota	Streptococcus	Streptococcus pneumoniae	Gram+																							2536455142	2536455143	2536455141
Streptococcus pneumoniae PNI0197	2534682058	Streptococcaceae	Bacilli	Lactobacillales	1159097	Bacillota	Streptococcus	Streptococcus pneumoniae	Gram+
Lactobacillus delbrueckii lactis DSM 20072	2534682072	Lactobacillaceae	Bacilli	Lactobacillales	888027	Bacillota	Lactobacillus	Lactobacillus delbrueckii	Gram+							2536499289
Streptococcus oralis SK100	2534682075	Streptococcaceae	Bacilli	Lactobacillales	1095740	Bacillota	Streptococcus	Streptococcus oralis	Gram+						2536507604																	2536508607	2536508608	2536508606			2536507919	2536507918
Streptococcus oralis SK610	2534682076	Streptococcaceae	Bacilli	Lactobacillales	1095741	Bacillota	Streptococcus	Streptococcus oralis	Gram+						2536509953
Streptococcus oralis SK10, NCTC 7864, ATCC 10557	2534682077	Streptococcaceae	Bacilli	Lactobacillales	1095739	Bacillota	Streptococcus	Streptococcus oralis	Gram+						2536511009																	2536511876	2536511877	2536511875
Streptococcus infantis SK959, GTC 849	2534682079	Streptococcaceae	Bacilli	Lactobacillales	889204	Bacillota	Streptococcus	Streptococcus infantis	Gram+						2536518846
Helicobacter pylori GAM100Ai	2534682105	Helicobacteraceae	Epsilonproteobacteria	Campylobacterales	1159019	Campylobacterota	Helicobacter	Helicobacter pylori	Gram-
Schaalia cardiffensis F0333	2534682138	Actinomycetaceae	Actinomycetes	Actinomycetales	888050	Actinomycetota	Schaalia	Schaalia cardiffensis	Gram+						2536715981														2536716970
Streptococcus intermedius F0395	2534682144	Streptococcaceae	Bacilli	Lactobacillales	857292	Bacillota	Streptococcus	Streptococcus intermedius	Gram+						2536738282
Rothia mucilaginosa M508	2534682146	Micrococcaceae	Actinomycetes	Micrococcales	563033	Actinomycetota	Rothia	Rothia mucilaginosa	Gram+						2536743923
Helicobacter pylori HP260ASii	2534682177	Helicobacteraceae	Epsilonproteobacteria	Campylobacterales	1159078	Campylobacterota	Helicobacter	Helicobacter pylori	Gram-
Helicobacter pylori HP260BFii	2534682178	Helicobacteraceae	Epsilonproteobacteria	Campylobacterales	1159079	Campylobacterota	Helicobacter	Helicobacter pylori	Gram-
Helicobacter pylori HP250ASii	2534682179	Helicobacteraceae	Epsilonproteobacteria	Campylobacterales	1159070	Campylobacterota	Helicobacter	Helicobacter pylori	Gram-																				2536874560
Helicobacter pylori HP250BFi	2534682180	Helicobacteraceae	Epsilonproteobacteria	Campylobacterales	1159071	Campylobacterota	Helicobacter	Helicobacter pylori	Gram-
Helicobacter pylori HP250BFii	2534682181	Helicobacteraceae	Epsilonproteobacteria	Campylobacterales	1159072	Campylobacterota	Helicobacter	Helicobacter pylori	Gram-
Helicobacter pylori HP250BFiii	2534682182	Helicobacteraceae	Epsilonproteobacteria	Campylobacterales	1159073	Campylobacterota	Helicobacter	Helicobacter pylori	Gram-
Helicobacter pylori HP250BFiV	2534682183	Helicobacteraceae	Epsilonproteobacteria	Campylobacterales	1159074	Campylobacterota	Helicobacter	Helicobacter pylori	Gram-																				2536879922
Helicobacter pylori HP250BSi	2534682184	Helicobacteraceae	Epsilonproteobacteria	Campylobacterales	1159075	Campylobacterota	Helicobacter	Helicobacter pylori	Gram-																				2536882744
Helicobacter pylori HP260AFi	2534682185	Helicobacteraceae	Epsilonproteobacteria	Campylobacterales	1159076	Campylobacterota	Helicobacter	Helicobacter pylori	Gram-
Helicobacter pylori HP260AFii	2534682186	Helicobacteraceae	Epsilonproteobacteria	Campylobacterales	1159077	Campylobacterota	Helicobacter	Helicobacter pylori	Gram-																				2536885908
Parabacteroides johnsonii CL02T12C29	2534682202	Tannerellaceae	Bacteroidia	Bacteroidales	999419	Bacteroidota	Parabacteroides	Parabacteroides johnsonii	Gram-		2536935029	2536935030	2536935031				2536935019	2536935020	2536935021
Parabacteroides goldsteinii CL02T12C30	2534682203	Tannerellaceae	Bacteroidia	Bacteroidales	999418	Bacteroidota	Parabacteroides	Parabacteroides goldsteinii	Gram-
Clostridium colicanis 209318	2534682204	Clostridiaceae	Clostridia	Eubacteriales	999411	Bacillota	Clostridium	Clostridium colicanis	Gram+		2536946022	2536946021	2536946020			2536943719
Enterocloster clostridioformis CM201	2534682205	Lachnospiraceae	Clostridia	Lachnospirales	999410	Bacillota	Enterocloster	Enterocloster clostridioformis	Gram+											2536947810| 2536948926									2536947954
Enterocloster clostridioformis 90B1	2534682206	Lachnospiraceae	Clostridia	Lachnospirales	999409	Bacillota	Enterocloster	Enterocloster clostridioformis	Gram+											2536954751| 2536953757
Enterocloster clostridioformis 90A8	2534682207	Lachnospiraceae	Clostridia	Lachnospirales	999408	Bacillota	Enterocloster	Enterocloster clostridioformis	Gram+											2536960460| 2536961815
Parabacteroides distasonis CL09T03C24	2534682208	Tannerellaceae	Bacteroidia	Bacteroidales	999417	Bacteroidota	Parabacteroides	Parabacteroides distasonis	Gram-
Parabacteroides distasonis CL03T12C09	2534682209	Tannerellaceae	Bacteroidia	Bacteroidales	999416	Bacteroidota	Parabacteroides	Parabacteroides distasonis	Gram-		2536970704	2536970705	2536970706				2536969045	2536969046	2536969047
Erysipelatoclostridium innocuum 2959	2534682210	Clostridiaceae	Clostridia	Eubacteriales	999413	Bacillota	Clostridium	[Clostridium] innocuum	Gram+		2536975472	2536975473	2536975474		2536972869																						2536973445	2536973444
Hungatella hathewayi 12489931	2534682211	Lachnospiraceae	Clostridia	Lachnospirales	999412	Bacillota	Hungatella	Hungatella hathewayi	Gram+							2536982264				2536982358| 2536977473
Yokenella regensburgei ATCC 43003	2534682241	Enterobacteriaceae	Gammaproteobacteria	Enterobacterales	1002368	Pseudomonadota	Yokenella	Yokenella regensburgei	Gram-		2537111921	2537111920	2537111919			2537110725| 2537112824	2537110119	2537110118	2537110117	2537112617				2537110340	2537110341	2537109895	2537109894								2537113318	2537113319
Helicobacter pylori GAM42Ai	2534682269	Helicobacteraceae	Epsilonproteobacteria	Campylobacterales	1159052	Campylobacterota	Helicobacter	Helicobacter pylori	Gram-
Helicobacter pylori GAM71Ai	2534682270	Helicobacteraceae	Epsilonproteobacteria	Campylobacterales	1159053	Campylobacterota	Helicobacter	Helicobacter pylori	Gram-
Helicobacter pylori GAM268Bii	2534682271	Helicobacteraceae	Epsilonproteobacteria	Campylobacterales	1159050	Campylobacterota	Helicobacter	Helicobacter pylori	Gram-																				2537214983
Helicobacter pylori GAM270ASi	2534682272	Helicobacteraceae	Epsilonproteobacteria	Campylobacterales	1159051	Campylobacterota	Helicobacter	Helicobacter pylori	Gram-
Helicobacter pylori GAM83T	2534682273	Helicobacteraceae	Epsilonproteobacteria	Campylobacterales	1159056	Campylobacterota	Helicobacter	Helicobacter pylori	Gram-																				2537218867
Helicobacter pylori GAM93Bi	2534682274	Helicobacteraceae	Epsilonproteobacteria	Campylobacterales	1159057	Campylobacterota	Helicobacter	Helicobacter pylori	Gram-																				2537219971
Helicobacter pylori GAM80Ai	2534682275	Helicobacteraceae	Epsilonproteobacteria	Campylobacterales	1159054	Campylobacterota	Helicobacter	Helicobacter pylori	Gram-																				2537222198
Helicobacter pylori GAM83Bi	2534682276	Helicobacteraceae	Epsilonproteobacteria	Campylobacterales	1159055	Campylobacterota	Helicobacter	Helicobacter pylori	Gram-
Helicobacter pylori GAM96Ai	2534682277	Helicobacteraceae	Epsilonproteobacteria	Campylobacterales	1159058	Campylobacterota	Helicobacter	Helicobacter pylori	Gram-
Helicobacter pylori GAMchJs106B	2534682278	Helicobacteraceae	Epsilonproteobacteria	Campylobacterales	1159059	Campylobacterota	Helicobacter	Helicobacter pylori	Gram-
Enterococcus faecium R499	2534682300	Enterococcaceae	Bacilli	Lactobacillales	1134838	Bacillota	Enterococcus	Enterococcus faecium	Gram+						2537305845	2537306716	2537305854	2537305853|2537305851	2537305852																		2537306009	2537306008
Enterococcus faecium R501	2534682301	Enterococcaceae	Bacilli	Lactobacillales	1134839	Bacillota	Enterococcus	Enterococcus faecium	Gram+						2537309387	2537309941	2537309378	2537309379|2537309381	2537309380																		2537309470	2537309469
Enterococcus faecium R496	2534682302	Enterococcaceae	Bacilli	Lactobacillales	1134836	Bacillota	Enterococcus	Enterococcus faecium	Gram+						2537311911	2537312542	2537311902	2537311903|2537311905	2537311904
Enterococcus faecium R497	2534682303	Enterococcaceae	Bacilli	Lactobacillales	1134837	Bacillota	Enterococcus	Enterococcus faecium	Gram+						2537317080	2537316976
Enterococcus faecium R446	2534682304	Enterococcaceae	Bacilli	Lactobacillales	1134834	Bacillota	Enterococcus	Enterococcus faecium	Gram+						2537318370	2537319736	2537318361	2537318362|2537318364	2537318363
Enterococcus faecium R494	2534682305	Enterococcaceae	Bacilli	Lactobacillales	1134835	Bacillota	Enterococcus	Enterococcus faecium	Gram+						2537322347	2537323160	2537322337	2537322338|2537322340	2537322339																		2537321776	2537321775
Enterococcus faecium P1190	2534682306	Enterococcaceae	Bacilli	Lactobacillales	1134832	Bacillota	Enterococcus	Enterococcus faecium	Gram+						2537325697	2537326795
Enterococcus faecium S447	2534682308	Enterococcaceae	Bacilli	Lactobacillales	1134840	Bacillota	Enterococcus	Enterococcus faecium	Gram+						2537333957	2537335541
Enterococcus faecium V689	2534682309	Enterococcaceae	Bacilli	Lactobacillales	1134841	Bacillota	Enterococcus	Enterococcus faecium	Gram+						2537338943	2537338209	2537338954	2537338953|2537338951	2537338952
Treponema denticola F0402	2534682337	Treponemataceae	Spirochaetia	Spirochaetales	699187	Spirochaetota	Treponema	Treponema denticola	Gram-											2537435254
Listeria innocua ATCC 33091	2537561540	Listeriaceae	Bacilli	Bacillales	1002366	Bacillota	Listeria	Listeria innocua	Gram+						2537716254					2537716213
Bacteroides fragilis CL05T12C13	2537561570	Bacteroidaceae	Bacteroidia	Bacteroidales	997881	Bacteroidota	Bacteroides	Bacteroides fragilis	Gram-		2537822361	2537822362	2537822363				2537824154	2537824155	2537824156	2537823705
Prevotella nigrescens F0103	2537561577	Prevotellaceae	Bacteroidia	Bacteroidales	702439	Bacteroidota	Prevotella	Prevotella nigrescens	Gram-
Cutibacterium acnes HL110PA3	2537561578	Propionibacteriaceae	Actinomycetes	Propionibacteriales	765079	Actinomycetota	Cutibacterium	Cutibacterium acnes	Gram+		2537849405	2537849406	2537849407	2537849404	2537850946	2537851564	2537850323	2537850324	2537850325																2537851057	2537851056
Cutibacterium acnes HL110PA2	2537561579	Propionibacteriaceae	Actinomycetes	Propionibacteriales	765078	Actinomycetota	Cutibacterium	Cutibacterium acnes	Gram+		2537851681	2537851680	2537851679	2537851682	2537853304	2537852020	2537853854	2537853855	2537853856																2537853199	2537853200
Cutibacterium acnes HL043PA2	2537561580	Propionibacteriaceae	Actinomycetes	Propionibacteriales	765073	Actinomycetota	Cutibacterium	Cutibacterium acnes	Gram+						2537855824	2537854253
Cutibacterium acnes HL043PA1	2537561581	Propionibacteriaceae	Actinomycetes	Propionibacteriales	765072	Actinomycetota	Cutibacterium	Cutibacterium acnes	Gram+						2537857833	2537857088
Cutibacterium acnes HL013PA2	2537561582	Propionibacteriaceae	Actinomycetes	Propionibacteriales	765070	Actinomycetota	Cutibacterium	Cutibacterium acnes	Gram+		2537861171	2537861170	2537861169	2537861172	2537861801	2537859584	2537860589	2537860590	2537860591																2537861908	2537861906
Cutibacterium acnes HL110PA1	2537561583	Propionibacteriaceae	Actinomycetes	Propionibacteriales	765077	Actinomycetota	Cutibacterium	Cutibacterium acnes	Gram+						2537864251	2537862245
Cutibacterium acnes HL074PA1	2537561584	Propionibacteriaceae	Actinomycetes	Propionibacteriales	765076	Actinomycetota	Cutibacterium	Cutibacterium acnes	Gram+		2537867249	2537867248	2537867247	2537867250	2537866284	2537866862	2537864961	2537864962	2537864963																2537866175	2537866177
Cutibacterium acnes HL072PA2	2537561585	Propionibacteriaceae	Actinomycetes	Propionibacteriales	765075	Actinomycetota	Cutibacterium	Cutibacterium acnes	Gram+		2537868002	2537868001	2537868000	2537868003	2537869664	2537869056	2537869300	2537869301	2537869302																2537869772	2537869771
Cutibacterium acnes HL072PA1	2537561586	Propionibacteriaceae	Actinomycetes	Propionibacteriales	765074	Actinomycetota	Cutibacterium	Cutibacterium acnes	Gram+		2537872253	2537872254	2537872255	2537872252	2537871643	2537870588	2537870987	2537870988	2537870989																2537871540	2537871541
Cutibacterium acnes HL099PA1	2537561594	Propionibacteriaceae	Actinomycetes	Propionibacteriales	765063	Actinomycetota	Cutibacterium	Cutibacterium acnes	Gram+		2537908350	2537908351	2537908352		2537907336	2537906147	2537907972	2537907971	2537907970																2537907441	2537907440
Cutibacterium acnes HL097PA1	2537561595	Propionibacteriaceae	Actinomycetes	Propionibacteriales	765064	Actinomycetota	Cutibacterium	Cutibacterium acnes	Gram+		2537909055	2537909056	2537909057		2537910767	2537908732	2537909684	2537909685	2537909686																2537910661	2537910663
Cutibacterium acnes HL103PA1	2537561596	Propionibacteriaceae	Actinomycetes	Propionibacteriales	765061	Actinomycetota	Cutibacterium	Cutibacterium acnes	Gram+		2537911667	2537911668	2537911669		2537912796	2537911357	2537912242	2537912241	2537912240																2537912899	2537912897
Cutibacterium acnes HL096PA3	2537561597	Propionibacteriaceae	Actinomycetes	Propionibacteriales	765057	Actinomycetota	Cutibacterium	Cutibacterium acnes	Gram+						2537914786	2537916027
Cutibacterium acnes HL096PA2	2537561598	Propionibacteriaceae	Actinomycetes	Propionibacteriales	765058	Actinomycetota	Cutibacterium	Cutibacterium acnes	Gram+						2537918453	2537916528
Aggregatibacter aphrophilus F0387	2537561617	Pasteurellaceae	Gammaproteobacteria	Pasteurellales	679198	Pseudomonadota	Aggregatibacter	Aggregatibacter aphrophilus	Gram-											2537979349
Mogibacterium sp. CM50	2537561628	Anaerovoracaceae	Clostridia	Peptostreptococcales	936375	Bacillota	Mogibacterium	Mogibacterium sp. CM50	Gram+
Veillonella sp. ACP1	2537561629	Veillonellaceae	Negativicutes	Veillonellales	936588	Bacillota	Veillonella	Veillonella sp. ACP1	Gram-
Streptococcus sp. AS14	2537561630	Streptococcaceae	Bacilli	Lactobacillales	936577	Bacillota	Streptococcus	Streptococcus sp. AS14	Gram+																							2538029077	2538029078	2538029076			2538029154	2538029153
Streptococcus sp. BS35b	2537561631	Streptococcaceae	Bacilli	Lactobacillales	1105032	Bacillota	Streptococcus	Streptococcus sp. BS35b	Gram+						2538031070																	2538029680	2538029681	2538029679
Capnocytophaga sp. CM59	2537561632	Flavobacteriaceae	Flavobacteriia	Flavobacteriales	936370	Bacteroidota	Capnocytophaga	Capnocytophaga sp. CM59	Gram-
Selenomonas sp. CM52	2537561633	Selenomonadaceae	Negativicutes	Selenomonadales	936381	Bacillota	Selenomonas	Selenomonas sp. CM52	Gram-																				2538035886								2538035118	2538035117
Enterocloster bolteae 90A5	2537561659	Lachnospiraceae	Clostridia	Lachnospirales	997893	Bacillota	Enterocloster	Enterocloster bolteae	Gram+		2538152295	2538152296	2538152297							2538150972| 2538151834| 2538152264
Bacteroides xylanisolvens CL03T12C04	2537561660	Bacteroidaceae	Bacteroidia	Bacteroidales	997892	Bacteroidota	Bacteroides	Bacteroides xylanisolvens	Gram-
Bacteroides ovatus CL02T12C04	2537561663	Bacteroidaceae	Bacteroidia	Bacteroidales	997885	Bacteroidota	Bacteroides	Bacteroides ovatus	Gram-		2538170455	2538170454	2538170453				2538167985	2538167984	2538167983
Bacteroides nordii CL02T12C05	2537561664	Bacteroidaceae	Bacteroidia	Bacteroidales	997884	Bacteroidota	Bacteroides	Bacteroides nordii	Gram-		2538171773	2538171774	2538171775				2538173941	2538173942	2538173943
Bacteroides salyersiae CL02T12C01	2537561665	Bacteroidaceae	Bacteroidia	Bacteroidales	997887	Bacteroidota	Bacteroides	Bacteroides salyersiae	Gram-		2538176260	2538176259	2538176258				2538178876	2538178877	2538178878
Bacteroides ovatus CL03T12C18	2537561666	Bacteroidaceae	Bacteroidia	Bacteroidales	997886	Bacteroidota	Bacteroides	Bacteroides ovatus	Gram-		2538184145	2538184144	2538184143				2538184997	2538184996	2538184995
Cutibacterium acnes HL046PA2	2537561671	Propionibacteriaceae	Actinomycetes	Propionibacteriales	765095	Actinomycetota	Cutibacterium	Cutibacterium acnes	Gram+		2538201423	2538201424	2538201425	2538201422	2538200546	2538199922	2538199375	2538199374	2538199373																2538200442	2538200443
Cutibacterium acnes HL046PA1	2537561672	Propionibacteriaceae	Actinomycetes	Propionibacteriales	765094	Actinomycetota	Cutibacterium	Cutibacterium acnes	Gram+		2538202611	2538202612	2538202613	2538202610	2538203502	2538202018	2538204358	2538204357	2538204356																2538203608	2538203607
Cutibacterium acnes HL005PA2	2537561673	Propionibacteriaceae	Actinomycetes	Propionibacteriales	765097	Actinomycetota	Cutibacterium	Cutibacterium acnes	Gram+		2538205947	2538205946	2538205945	2538205948	2538205084	2538207142	2538206451	2538206450	2538206449																2538205193	2538205192
Cutibacterium acnes HL005PA1	2537561674	Propionibacteriaceae	Actinomycetes	Propionibacteriales	765096	Actinomycetota	Cutibacterium	Cutibacterium acnes	Gram+		2538207795	2538207794	2538207793	2538207796	2538209287	2538208542	2538208671	2538208670	2538213369																2538209397	2538209396
Cutibacterium acnes HL059PA1	2537561675	Propionibacteriaceae	Actinomycetes	Propionibacteriales	765091	Actinomycetota	Cutibacterium	Cutibacterium acnes	Gram+						2538210949	2538209846
Cutibacterium acnes HL025PA2	2537561676	Propionibacteriaceae	Actinomycetes	Propionibacteriales	765090	Actinomycetota	Cutibacterium	Cutibacterium acnes	Gram+		2538213120	2538213121	2538213122	2538213119	2538214444	2538212401	2538213369	2538213370	2538213371																2538214336	2538214337
Cutibacterium acnes HL086PA1	2537561677	Propionibacteriaceae	Actinomycetes	Propionibacteriales	765093	Actinomycetota	Cutibacterium	Cutibacterium acnes	Gram+						2538216864	2538216225
Cutibacterium acnes HL059PA2	2537561678	Propionibacteriaceae	Actinomycetes	Propionibacteriales	765092	Actinomycetota	Cutibacterium	Cutibacterium acnes	Gram+		2538218415	2538218414	2538218413	2538218416	2538219411	2538217851	2538218789	2538218790	2538218791																2538219304	2538219305
Cutibacterium acnes HL005PA4	2537561681	Propionibacteriaceae	Actinomycetes	Propionibacteriales	765099	Actinomycetota	Cutibacterium	Cutibacterium acnes	Gram+						2538224959	2538223569
Cutibacterium acnes HL005PA3	2537561682	Propionibacteriaceae	Actinomycetes	Propionibacteriales	765098	Actinomycetota	Cutibacterium	Cutibacterium acnes	Gram+		2538226639	2538226640	2538226641	2538226638	2538227327	2538227959	2538226248	2538226247	2538226246																2538227432	2538227431
Clostridioides difficile 70-100-2010	2537561695	Peptostreptococcaceae	Clostridia	Peptostreptococcales	1002369	Bacillota	Clostridioides	Clostridioides difficile	Gram+
Porphyromonas catoniae F0037	2537561696	Porphyromonadaceae	Bacteroidia	Bacteroidales	1127696	Bacteroidota	Porphyromonas	Porphyromonas catoniae	Gram-
Butyricicoccus pullicaecorum 1.2	2537561731	Butyricicoccaceae	Clostridia	Eubacteriales	1203606	Bacillota	Butyricicoccus	Butyricicoccus pullicaecorum	Gram+
Cutibacterium acnes HL082PA1	2537561736	Propionibacteriaceae	Actinomycetes	Propionibacteriales	765120	Actinomycetota	Cutibacterium	Cutibacterium acnes	Gram+						2538465595	2538464553
Cutibacterium acnes HL056PA1	2537561743	Propionibacteriaceae	Actinomycetes	Propionibacteriales	765119	Actinomycetota	Cutibacterium	Cutibacterium acnes	Gram+						2538480375	2538480009
Bacteroides uniformis CL03T00C23	2537561752	Bacteroidaceae	Bacteroidia	Bacteroidales	997889	Bacteroidota	Bacteroides	Bacteroides uniformis	Gram-		2538505856	2538505857	2538505858
Enterococcus faecalis TX0309A	2537561754	Enterococcaceae	Bacilli	Lactobacillales	749503	Bacillota	Enterococcus	Enterococcus faecalis	Gram+						2538512623	2538512635
Enterococcus faecalis TX0309B	2537561755	Enterococcaceae	Bacilli	Lactobacillales	749504	Bacillota	Enterococcus	Enterococcus faecalis	Gram+						2538516905	2538516893	2538516900	2538516901|2538516903	2538516902
Phocaeicola vulgatus CL09T03C04	2537561756	Bacteroidaceae	Bacteroidia	Bacteroidales	997891	Bacteroidota	Phocaeicola	Phocaeicola vulgatus	Gram-
Enterococcus faecalis TX0017	2537561757	Enterococcaceae	Bacilli	Lactobacillales	749497	Bacillota	Enterococcus	Enterococcus faecalis	Gram+						2538523765	2538523755	2538523760	2538523761|2538523763	2538523762
Enterococcus faecalis TX0027	2537561758	Enterococcaceae	Bacilli	Lactobacillales	749498	Bacillota	Enterococcus	Enterococcus faecalis	Gram+						2538528033	2538528044
Enterococcus faecalis TX0031	2537561760	Enterococcaceae	Bacilli	Lactobacillales	749499	Bacillota	Enterococcus	Enterococcus faecalis	Gram+						2538533017	2538533028	2538533022	2538533019|2538533021	2538533020																		2538532157	2538532156
Enterococcus faecalis TX0043	2537561761	Enterococcaceae	Bacilli	Lactobacillales	749500	Bacillota	Enterococcus	Enterococcus faecalis	Gram+						2538536537	2538536547	2538536542	2538536539|2538536541	2538536540																		2538535086	2538535085
Campylobacter sp. FOBRC14	2537561772	Campylobacteraceae	Epsilonproteobacteria	Campylobacterales	936554	Campylobacterota	Campylobacter	Campylobacter sp. FOBRC14	Gram-																				2538570556
Actinomyces sp. ICM58	2537561773	Actinomycetaceae	Actinomycetes	Actinomycetales	1105030	Actinomycetota	Actinomyces	Actinomyces sp. ICM58	Gram+						2538573864
Actinomyces sp. ICM47	2537561777	Actinomycetaceae	Actinomycetes	Actinomycetales	936548	Actinomycetota	Actinomyces	Actinomyces sp. ICM47	Gram+						2538588075
Porphyromonas gingivalis W50, ATCC 53978	2537561784	Porphyromonadaceae	Bacteroidia	Bacteroidales	1125722	Bacteroidota	Porphyromonas	Porphyromonas gingivalis	Gram-
Sphingobium yanoikuyae ATCC 51230	2537561796	Sphingomonadaceae	Alphaproteobacteria	Sphingomonadales	883163	Pseudomonadota	Sphingobium	Sphingobium yanoikuyae	Gram-		2538660874	2538660875	2538660876	2538660873		2538660879| 2538659692					2538660699	2538660698	2538660697							2538659461	2538659454				2538659764	2538659762
Corynebacterium otitidis ATCC 51513	2537561797	Corynebacteriaceae	Actinomycetes	Mycobacteriales	883169	Actinomycetota	Corynebacterium	Corynebacterium otitidis	Gram+											2538665579| 2538665031| 2538664980| 2538665590									2538665530
Cutibacterium acnes HL007PA1	2537561815	Propionibacteriaceae	Actinomycetes	Propionibacteriales	765118	Actinomycetota	Cutibacterium	Cutibacterium acnes	Gram+		2538748416	2538748417	2538748418	2538748415	2538750189	2538749132	2538749371	2538749372	2538749373																2538750082	2538750083
Cutibacterium acnes HL002PA3	2537561816	Propionibacteriaceae	Actinomycetes	Propionibacteriales	765117	Actinomycetota	Cutibacterium	Cutibacterium acnes	Gram+		2538751837	2538751838	2538751839	2538751836	2538752716	2538750893	2538751286	2538751287	2538751288																2538752823	2538752822
Cutibacterium acnes HL053PA1	2537561817	Propionibacteriaceae	Actinomycetes	Propionibacteriales	765066	Actinomycetota	Cutibacterium	Cutibacterium acnes	Gram+						2538755452	2538753951
Cutibacterium acnes HL002PA1	2537561818	Propionibacteriaceae	Actinomycetes	Propionibacteriales	765115	Actinomycetota	Cutibacterium	Cutibacterium acnes	Gram+						2538757620	2538757057
Cutibacterium acnes HL063PA1	2537561819	Propionibacteriaceae	Actinomycetes	Propionibacteriales	765113	Actinomycetota	Cutibacterium	Cutibacterium acnes	Gram+						2538760492	2538758915
Cutibacterium acnes HL027PA2	2537561820	Propionibacteriaceae	Actinomycetes	Propionibacteriales	765112	Actinomycetota	Cutibacterium	Cutibacterium acnes	Gram+		2538763170	2538763171	2538763172	2538763169	2538761611	2538761163	2538762601	2538762602	2538762603																2538761722	2538761720
Cutibacterium acnes HL027PA1	2537561821	Propionibacteriaceae	Actinomycetes	Propionibacteriales	765111	Actinomycetota	Cutibacterium	Cutibacterium acnes	Gram+		2538765428	2538765429	2538765430	2538765427	2538764922	2538764439	2538766200	2538766199	2538766198																2538764811	2538764813
Cutibacterium acnes HL067PA1	2537561822	Propionibacteriaceae	Actinomycetes	Propionibacteriales	765110	Actinomycetota	Cutibacterium	Cutibacterium acnes	Gram+		2538768052	2538768051	2538768050	2538768053	2538767154	2538767554	2538768424	2538768425	2538768426																2538767047	2538767049
Prevotella saccharolytica F0055	2537561833	Prevotellaceae	Bacteroidia	Bacteroidales	1127699	Bacteroidota	Hoylesella	Hoylesella saccharolytica	Gram-
Streptococcus mitis SK579	2537561860	Streptococcaceae	Bacilli	Lactobacillales	1095737	Bacillota	Streptococcus	Streptococcus mitis	Gram+
Streptococcus intermedius SK54, ATCC 27335	2537561861	Streptococcaceae	Bacilli	Lactobacillales	1095731	Bacillota	Streptococcus	Streptococcus intermedius	Gram+						2538949432
Proteus mirabilis WGLW4	2537561873	Morganellaceae	Gammaproteobacteria	Enterobacterales	1125693	Pseudomonadota	Proteus	Proteus mirabilis	Gram-		2538998853	2538998854	2538998855				2538999567	2538999568	2538999569	2538999813| 2538998608| 2538997481				2538997324	2538997323				2538998397	2538998611	2538998610
Klebsiella pneumoniae WGLW5	2537561874	Enterobacteriaceae	Gammaproteobacteria	Enterobacterales	1203547	Pseudomonadota	Klebsiella	Klebsiella pneumoniae	Gram-		2539001288	2539001287	2539001286			2539004775	2539003640|2539003197	2539003641|2539003196|2539003198	2539003642|2539003199	2539001599| 2539001154				2539004368	2539004369	2539000606	2539000605		2539001628	2539001151	2539001152				2539002972	2539002973
Klebsiella pneumoniae WGLW3	2537561875	Enterobacteriaceae	Gammaproteobacteria	Enterobacterales	1203546	Pseudomonadota	Klebsiella	Klebsiella pneumoniae	Gram-							2539006160				2539009403| 2539011013| 2539009833
Klebsiella pneumoniae WGLW2	2537561876	Enterobacteriaceae	Gammaproteobacteria	Enterobacterales	1203545	Pseudomonadota	Klebsiella	Klebsiella pneumoniae	Gram-							2539015941				2539012816| 2539012365| 2539016520									2539012844
Proteus mirabilis WGLW6	2537561878	Morganellaceae	Gammaproteobacteria	Enterobacterales	1125694	Pseudomonadota	Proteus	Proteus mirabilis	Gram-		2539021057	2539021056	2539021055				2539020226	2539020226	2539020224	2539020049| 2539021307| 2539022838				2539022685	2539022684					2539021304	2539021305
Bifidobacterium longum 1-6B	2537561879	Bifidobacteriaceae	Actinomycetes	Bifidobacteriales	1161744	Actinomycetota	Bifidobacterium	Bifidobacterium longum	Gram+							2539024643| 2539025150
Lachnospiraceae bacterium sp. ICM7	2537561881	Lachnospiraceae	Clostridia	Lachnospirales	936594	Bacillota	Lachnoanaerobaculum	Lachnoanaerobaculum sp. ICM7	Gram+											2539031671
Peptostreptococcaceae bacterium AS15	2537561888	Peptostreptococcaceae	Clostridia	Peptostreptococcales	936556	Bacillota	unclassified	Peptostreptococcaceae bacterium AS15	Gram+											2539063067
Treponema denticola OTK	2537561889	Treponemataceae	Spirochaetia	Spirochaetales	999434	Spirochaetota	Treponema	Treponema denticola	Gram-											2539066277
Treponema denticola ATCC 35404	2537561890	Treponemataceae	Spirochaetia	Spirochaetales	999430	Spirochaetota	Treponema	Treponema denticola	Gram-											2539066656
Bergeyella zoohelcum ATCC 43767	2537561901	Weeksellaceae	Flavobacteriia	Flavobacteriales	883096	Bacteroidota	Bergeyella	Bergeyella zoohelcum	Gram-
Bergeyella zoohelcum CCUG 30536	2537561902	Weeksellaceae	Flavobacteriia	Flavobacteriales	883098	Bacteroidota	Bergeyella	Bergeyella zoohelcum	Gram-
Afipia felis felis ATCC 53690	2537561903	Nitrobacteraceae	Alphaproteobacteria	Hyphomicrobiales	883080	Pseudomonadota	Afipia	Afipia felis	Gram-		2539102766	2539102765	2539102764	2539102767		2539103448| 2539103447																			2539104784	2539104785
Alloiococcus otitis ATCC 51267	2537561904	Carnobacteriaceae	Bacilli	Lactobacillales	883081	Bacillota	Alloiococcus	Alloiococcus otitis	Gram+								2539106967|2539106636	2539106966|2539106639|2539106637	2539106964|2539106965|2539106638													2539107167	2539107168	2539107166			2539107327	2539107326
Afipia broomeae ATCC 49717	2537561905	Nitrobacteraceae	Alphaproteobacteria	Hyphomicrobiales	883078	Pseudomonadota	Afipia	Afipia broomeae	Gram-		2539113036	2539113037	2539113038	2539113035		2539110034| 2539109419| 2539109420														2539108243	2539108244				2539112494	2539112496	2539111076	2539111077
Afipia clevelandensis ATCC 49720	2537561906	Nitrobacteraceae	Alphaproteobacteria	Hyphomicrobiales	883079	Pseudomonadota	Afipia	Afipia clevelandensis	Gram-							2539113603| 2539114032
Klebsiella michiganensis 10-5250	2537561907	Enterobacteriaceae	Gammaproteobacteria	Enterobacterales	1134687	Pseudomonadota	Klebsiella	Klebsiella michiganensis	Gram-							2539120739				2539117467| 2539122204									2539122772
Clostridium perfringens WAL-14572	2537561919	Clostridiaceae	Clostridia	Eubacteriales	742739	Bacillota	Clostridium	Clostridium perfringens	Gram+		2539149238	2539149239	2539149240			2539149262
Eggerthia catenaformis OT 569	2537561938	Coprobacillaceae	Erysipelotrichia	Erysipelotrichales	999415	Bacillota	Eggerthia	Eggerthia catenaformis	Gram+											2539229591
Fusobacterium nucleatum animalis F0419	2537561939	Fusobacteriaceae	Fusobacteriia	Fusobacteriales	999414	Fusobacteriota	Fusobacterium	Fusobacterium animalis	Gram-
Streptococcus agalactiae ATCC 13813	2537561940	Streptococcaceae	Bacilli	Lactobacillales	888745	Bacillota	Streptococcus	Streptococcus agalactiae	Gram+							2539234586	2539235455	2539235456|2539235458	2539235457	2539234553
Streptococcus mitis bv. 2 F0392	2537561941	Streptococcaceae	Bacilli	Lactobacillales	768726	Bacillota	Streptococcus	Streptococcus oralis	Gram+						2539237275																	2539237688	2539237687	2539237689			2539237463	2539237464
Actinomyces massiliensis F0489	2537561942	Actinomycetaceae	Actinomycetes	Actinomycetales	1125718	Actinomycetota	Actinomyces	Actinomyces massiliensis	Gram+						2539240603		2539239406	2539239407	2539239408	2539240535| 2539240310
Aggregatibacter actinomycetemcomitans Y4	2537561947	Pasteurellaceae	Gammaproteobacteria	Pasteurellales	1035194	Pseudomonadota	Aggregatibacter	Aggregatibacter actinomycetemcomitans	Gram-																												2539263037	2539263035
Clostridiales bacterium OBRC5-5	2537561948	Lachnospiraceae	Clostridia	Lachnospirales	936595	Bacillota	Lachnoanaerobaculum	Lachnoanaerobaculum sp. OBRC5-5	Gram+											2539263729
Alloprevotella sp. oral taxon 473 F0040	2537561949	Prevotellaceae	Bacteroidia	Bacteroidales	1035197	Bacteroidota	Alloprevotella	Alloprevotella sp. oral taxon 473	Gram-
Corynebacterium durum F0235	2537561950	Corynebacteriaceae	Actinomycetes	Mycobacteriales	1035195	Actinomycetota	Corynebacterium	Corynebacterium durum	Gram+											2539269423| 2539269167										2539269170	2539269166				2539271114	2539271112
Peptostreptococcus anaerobius VPI 4330	2537561951	Peptostreptococcaceae	Clostridia	Peptostreptococcales	1035196	Bacillota	Peptostreptococcus	Peptostreptococcus anaerobius	Gram+
Pasteurella bettyae CCUG 2042	2537561960	Pasteurellaceae	Gammaproteobacteria	Pasteurellales	1095749	Pseudomonadota	Pasteurella	Pasteurella bettyae	Gram-											2539292495									2539292528
Neisseria sicca VK64, NCTC 4591	2537561961	Neisseriaceae	Betaproteobacteria	Neisseriales	1095748	Pseudomonadota	Neisseria	Neisseria sicca	Gram-											2539293627
Haemophilus parahaemolyticus HK385	2537561962	Pasteurellaceae	Gammaproteobacteria	Pasteurellales	1095744	Pseudomonadota	Haemophilus	Haemophilus parahaemolyticus	Gram-											2539297568									2539297488
Fusobacterium necrophorum funduliforme ATCC 51357	2537561963	Fusobacteriaceae	Fusobacteriia	Fusobacteriales	1095747	Fusobacteriota	Fusobacterium	Fusobacterium necrophorum	Gram-
Streptococcus mitis SK575	2537561964	Streptococcaceae	Bacilli	Lactobacillales	1095736	Bacillota	Streptococcus	Streptococcus mitis	Gram+						2539301415																	2539301820	2539301819	2539301821
Streptococcus oralis SK1074	2537561966	Streptococcaceae	Bacilli	Lactobacillales	1095738	Bacillota	Streptococcus	Streptococcus oralis	Gram+						2539307209
Streptococcus mitis SK616	2537561967	Streptococcaceae	Bacilli	Lactobacillales	1095735	Bacillota	Streptococcus	Streptococcus mitis	Gram+																							2539309932	2539309933	2539309931			2539310394	2539310395
Streptococcus constellatus constellatus SK53	2537561968	Streptococcaceae	Bacilli	Lactobacillales	1095730	Bacillota	Streptococcus	Streptococcus constellatus	Gram+						2539312142
Streptococcus sanguinis SK1087	2537561981	Streptococcaceae	Bacilli	Lactobacillales	888824	Bacillota	Streptococcus	Streptococcus sanguinis	Gram+
Streptococcus sanguinis SK1057	2537561982	Streptococcaceae	Bacilli	Lactobacillales	888821	Bacillota	Streptococcus	Streptococcus sanguinis	Gram+																							2539381615	2539381616	2539381614			2539381695	2539381694
Streptococcus sanguinis SK1056	2537561983	Streptococcaceae	Bacilli	Lactobacillales	888820	Bacillota	Streptococcus	Streptococcus sanguinis	Gram+																							2539383341	2539383342	2539383340
Streptococcus sanguinis SK1059	2537561984	Streptococcaceae	Bacilli	Lactobacillales	888823	Bacillota	Streptococcus	Streptococcus sanguinis	Gram+
Streptococcus sanguinis SK1058	2537561985	Streptococcaceae	Bacilli	Lactobacillales	888822	Bacillota	Streptococcus	Streptococcus sanguinis	Gram+																							2539388756	2539388757	2539388755			2539388834	2539388833
Streptococcus sanguinis SK405	2537561986	Streptococcaceae	Bacilli	Lactobacillales	888817	Bacillota	Streptococcus	Streptococcus sanguinis	Gram+																							2539390532	2539390533	2539390531
Streptococcus sanguinis SK355	2537561987	Streptococcaceae	Bacilli	Lactobacillales	888816	Bacillota	Streptococcus	Streptococcus sanguinis	Gram+						2539392341																	2539393776	2539393775	2539393777			2539393693	2539393694
Streptococcus sanguinis SK678	2537561988	Streptococcaceae	Bacilli	Lactobacillales	888819	Bacillota	Streptococcus	Streptococcus sanguinis	Gram+
Streptococcus sanguinis SK408	2537561989	Streptococcaceae	Bacilli	Lactobacillales	888818	Bacillota	Streptococcus	Streptococcus sanguinis	Gram+																							2539397605	2539397606	2539397604
Staphylococcus simulans ACS-120-V-Sch1	2537562023	Staphylococcaceae	Bacilli	Bacillales	883166	Bacillota	Staphylococcus	Staphylococcus simulans	Gram+						2539551258| 2539551259					2539551514| 2539552373| 2539551562| 2539551647| 2539551020									2539551606
Staphylococcus lugdunensis ACS-027-V-Sch2	2537562024	Staphylococcaceae	Bacilli	Bacillales	883164	Bacillota	Staphylococcus	Staphylococcus lugdunensis	Gram+						2539554796					2539554601| 2539554127| 2539555276									2539553609
Enterococcus durans FB129-CNAB-4	2537562025	Enterococcaceae	Bacilli	Lactobacillales	883162	Bacillota	Enterococcus	Enterococcus faecium	Gram+						2539557930	2539557908	2539557938	2539557937|2539557935	2539557936
Streptococcus pneumoniae PCS8203	2537562026	Streptococcaceae	Bacilli	Lactobacillales	1159082	Bacillota	Streptococcus	Streptococcus pneumoniae	Gram+
Streptococcus pneumoniae PCS70012	2537562027	Streptococcaceae	Bacilli	Lactobacillales	1159085	Bacillota	Streptococcus	Streptococcus pneumoniae	Gram+																							2539562088	2539562089	2539562087
Streptococcus pneumoniae PNI0002	2537562028	Streptococcaceae	Bacilli	Lactobacillales	1159087	Bacillota	Streptococcus	Streptococcus pneumoniae	Gram+																							2539565334	2539565333	2539565335
Streptococcus pneumoniae PCS81218	2537562029	Streptococcaceae	Bacilli	Lactobacillales	1159086	Bacillota	Streptococcus	Streptococcus pneumoniae	Gram+
Streptococcus pneumoniae PCS125219	2537562030	Streptococcaceae	Bacilli	Lactobacillales	1159084	Bacillota	Streptococcus	Streptococcus pneumoniae	Gram+
Streptococcus pneumoniae PNI0007	2537562031	Streptococcaceae	Bacilli	Lactobacillales	1159089	Bacillota	Streptococcus	Streptococcus pneumoniae	Gram+																							2539571042	2539571041	2539571043			2539571717	2539571718
Phocaeicola dorei CL02T00C15	2537562062	Bacteroidaceae	Bacteroidia	Bacteroidales	997875	Bacteroidota	Phocaeicola	Phocaeicola dorei	Gram-
Bacteroides fragilis CL03T00C08	2537562066	Bacteroidaceae	Bacteroidia	Bacteroidales	997878	Bacteroidota	Bacteroides	Bacteroides fragilis	Gram-
Actinomyces sp. oral taxon 181 F0379	2537562090	Actinomycetaceae	Actinomycetes	Actinomycetales	1127690	Actinomycetota	Actinomyces	Actinomyces sp. oral taxon 181	Gram+						2539768054
Enterococcus faecalis TX0012	2537562093	Enterococcaceae	Bacilli	Lactobacillales	749496	Bacillota	Enterococcus	Enterococcus faecalis	Gram+						2539780289	2539780302	2539780294	2539780293|2539780291	2539780292																		2539780582	2539780583
Cutibacterium acnes SK182	2537562124	Propionibacteriaceae	Actinomycetes	Propionibacteriales	679193	Actinomycetota	Cutibacterium	Cutibacterium acnes	Gram+						2539869357	2539870634
Selenomonas noxia F0398	2537562180	Selenomonadaceae	Negativicutes	Selenomonadales	702437	Bacillota	Selenomonas	Selenomonas noxia	Gram-
Actinomyces sp. ICM39	2537562196	Actinomycetaceae	Actinomycetes	Actinomycetales	1105029	Actinomycetota	Actinomyces	Actinomyces sp. ICM39	Gram+						2540142003
Capnocytophaga sp. oral taxon 412 F0487	2540341000	Flavobacteriaceae	Flavobacteriia	Flavobacteriales	1125721	Bacteroidota	Capnocytophaga	Capnocytophaga sp. oral taxon 412	Gram-
Staphylococcus epidermidis NIH05003	2540341001	Staphylococcaceae	Bacilli	Bacillales	1155133	Bacillota	Staphylococcus	Staphylococcus epidermidis	Gram+						2540345131					2540344974| 2540344864| 2540344065
Staphylococcus epidermidis NIH04003	2540341002	Staphylococcaceae	Bacilli	Bacillales	1155132	Bacillota	Staphylococcus	Staphylococcus epidermidis	Gram+		2540347587	2540347586	2540347585		2540347126		2540347461|2540347138	2540347460|2540347135|2540347458|2540347137	2540347459|2540347136	2540347282| 2540346401| 2540347424										2540347279	2540347280						2540345889	2540345890
Staphylococcus epidermidis NIH051668	2540341003	Staphylococcaceae	Bacilli	Bacillales	1155131	Bacillota	Staphylococcus	Staphylococcus epidermidis	Gram+						2540349595					2540349749| 2540348825| 2540349862									2540350272
Staphylococcus epidermidis NIH051475	2540341004	Staphylococcaceae	Bacilli	Bacillales	1155130	Bacillota	Staphylococcus	Staphylococcus epidermidis	Gram+						2540352245		2540352542|2540352257	2540352539|2540352254|2540352541|2540352256	2540352255|2540352540	2540352401| 2540351476| 2540352506										2540352398	2540352399
Staphylococcus epidermidis NIH08001	2540341005	Staphylococcaceae	Bacilli	Bacillales	1155135	Bacillota	Staphylococcus	Staphylococcus epidermidis	Gram+						2540354997					2540354842| 2540354702| 2540353616
Staphylococcus epidermidis NIH06004	2540341006	Staphylococcaceae	Bacilli	Bacillales	1155134	Bacillota	Staphylococcus	Staphylococcus epidermidis	Gram+						2540355826					2540355980| 2540357265| 2540356118
Limosilactobacillus oris F0423	2540341034	Lactobacillaceae	Bacilli	Lactobacillales	944562	Bacillota	Limosilactobacillus	Limosilactobacillus oris	Gram+						2540444628
Fusobacterium nucleatum animalis ATCC 51191	2540341044	Fusobacteriaceae	Fusobacteriia	Fusobacteriales	997347	Fusobacteriota	Fusobacterium	Fusobacterium animalis	Gram-																				2540488156
Streptococcus pneumoniae gamPNI0373	2540341132	Streptococcaceae	Bacilli	Lactobacillales	697283	Bacillota	Streptococcus	Streptococcus pneumoniae	Gram+
Arachnia propionica F0230a	2540341165	Propionibacteriaceae	Actinomycetes	Propionibacteriales	767029	Actinomycetota	Arachnia	Arachnia propionica	Gram+						2540807718					2540807171
Cedecea davisae 005, DSM 4568	2541046972	Enterobacteriaceae	Gammaproteobacteria	Enterobacterales	566551	Pseudomonadota	Cedecea	Cedecea davisae	Gram-		2541306105	2541306104	2541306103			2541307005| 2541309708	2541308731|2541306204|2541307024	2541308732|2541306205|2541307025|2541306203|2541307027	2541308733|2541306202|2541307026	2541307170| 2541305534				2541309341	2541309342	2541305543	2541305542			2541307173	2541307172
Bacteroidetes bacterium oral taxon 272 F0290	2541046973	unclassified	unclassified	unclassified	888054	Bacteroidota	unclassified	Bacteroidetes bacterium oral taxon 272	Gram-
Treponema maltophilum ATCC 51939	2541046974	Treponemataceae	Spirochaetia	Spirochaetales	1125699	Spirochaetota	Treponema	Treponema maltophilum	Gram-
Treponema medium ATCC 700293	2541046975	Treponemataceae	Spirochaetia	Spirochaetales	1125700	Spirochaetota	Treponema	Treponema medium	Gram-											2541315453
Actinotignum schaalii FB123-CNA-2	2541046976	Actinomycetaceae	Actinomycetes	Actinomycetales	883067	Actinomycetota	Actinotignum	Actinotignum schaalii	Gram+							2541318412				2541317603
Gleimia europaea ACS-120-V-Col10b	2541046977	Actinomycetaceae	Actinomycetes	Actinomycetales	883069	Actinomycetota	Gleimia	Gleimia europaea	Gram+											2541319250| 2541319010									2541319900
Facklamia hominis ACS-120-V-Sch10	2541046978	Aerococcaceae	Bacilli	Lactobacillales	883110	Bacillota	Facklamia	Facklamia hominis	Gram+
Propionimicrobium lymphophilum ACS-093-V-SCH5	2541046979	Propionibacteriaceae	Actinomycetes	Propionibacteriales	883161	Actinomycetota	Propionimicrobium	Propionimicrobium lymphophilum	Gram+											2541323230
Capnocytophaga granulosa ATCC 51502	2541046980	Flavobacteriaceae	Flavobacteriia	Flavobacteriales	641143	Bacteroidota	Capnocytophaga	Capnocytophaga granulosa	Gram-
Delftia acidovorans CCUG 15835	2541046983	Comamonadaceae	Betaproteobacteria	Burkholderiales	883100	Pseudomonadota	Delftia	Delftia acidovorans			2541342068	2541342066	2541342067	2541342069		2541344340				2541339406															2541341997	2541341996
Delftia acidovorans CCUG 274B	2541046984	Comamonadaceae	Betaproteobacteria	Burkholderiales	883101	Pseudomonadota	Delftia	Delftia acidovorans	Gram-							2541347628				2541346141
Myroides odoratimimus CCUG 12700	2541046985	Flavobacteriaceae	Flavobacteriia	Flavobacteriales	883151	Bacteroidota	Myroides	Myroides odoratimimus	Gram-							2541353873				2541353454| 2541354278
Treponema denticola SP32	2541046987	Treponemataceae	Spirochaetia	Spirochaetales	999436	Spirochaetota	Treponema	Treponema denticola	Gram-											2541360524| 2541359631
Treponema denticola SP44	2541046988	Treponemataceae	Spirochaetia	Spirochaetales	999439	Spirochaetota	Treponema	Treponema denticola	Gram-											2541363018
Treponema denticola SP23	2541046989	Treponemataceae	Spirochaetia	Spirochaetales	999435	Spirochaetota	Treponema	Treponema denticola	Gram-											2541363693
Bacteroides stercoris CC31F	2541046992	Bacteroidaceae	Bacteroidia	Bacteroidales	1073351	Bacteroidota	Bacteroides	Bacteroides stercoris	Gram+
Corynebacterium sp. HFH0082	2541046993	Corynebacteriaceae	Actinomycetes	Mycobacteriales	1078764	Actinomycetota	Corynebacterium	Corynebacterium sp. HFH0082	Gram+		2541376276	2541376275	2541376274	2541376277						2541376065| 2541378099| 2541376283									2541377186	2541376284	2541376282
Paenibacillus sp. HGH0039	2541046994	Paenibacillaceae	Bacilli	Bacillales	1078505	Bacillota	Paenibacillus	Paenibacillus sp. HGH0039	Gram+						2541383485
Staphylococcus sp. HGB0015	2541046995	Staphylococcaceae	Bacilli	Bacillales	1078083	Bacillota	Staphylococcus	Staphylococcus sp. HGB0015	Gram+		2541384085	2541384086	2541384087							2541385753| 2541386112| 2541386164| 2541384683										2541385756	2541385755						2541384154	2541384155
Coprococcus sp. HPP0048	2541046996	Lachnospiraceae	Clostridia	Lachnospirales	1078091	Bacillota	Coprococcus	Coprococcus sp. HPP0048	Gram+		2541387652	2541387651	2541387650							2541387875
Coprococcus sp. HPP0074	2541046997	Lachnospiraceae	Clostridia	Lachnospirales	1078090	Bacillota	Coprococcus	Coprococcus sp. HPP0074	Gram+		2541389141	2541389142	2541389143
Streptomyces sp. HGB0020	2541046998	Streptomycetaceae	Actinomycetes	Kitasatosporales	1078086	Actinomycetota	Streptomyces	Streptomyces sp. HGB0020	Gram+		2541396032	2541396031	2541396030	2541396033	2541396034| 2541394077		2541398366|2541400218	2541400217|2541398362|2541398363|2541400219	2541398364|2541400220		2541398199	2541398198	2541398197							2541395796|2541396705	2541395793|2541396704				2541398693	2541398694
Paenisporosarcina sp. HGH0030	2541046999	Caryophanaceae	Bacilli	Bacillales	1078085	Bacillota	Paenisporosarcina	Paenisporosarcina sp. HGH0030	Gram+		2541402514	2541402513	2541402512		2541402773		2541403659	2541403660	2541403661	2541403345
Corynebacterium pyruviciproducens ATCC BAA-1742	2541047000	Corynebacteriaceae	Actinomycetes	Mycobacteriales	1125779	Actinomycetota	Corynebacterium	Corynebacterium pyruviciproducens	Gram+		2541405265	2541405264	2541405262	2541405266		2541405560				2541404056| 2541405093| 2541405897															2541405382	2541405384
Treponema socranskii paredis ATCC 35535	2541047001	Treponemataceae	Spirochaetia	Spirochaetales	1125701	Spirochaetota	Treponema	Treponema socranskii	Gram-
Treponema vincentii F0403	2541047002	Treponemataceae	Spirochaetia	Spirochaetales	1125702	Spirochaetota	Treponema	Treponema vincentii	Gram-											2541410370
Hoylesella oralis HGA0225	2541047008	Prevotellaceae	Bacteroidia	Bacteroidales	1203550	Bacteroidota	Hoylesella	Hoylesella oralis	Gram-
Sutterella wadsworthensis HGA0223	2541047009	Sutterellaceae	Betaproteobacteria	Burkholderiales	1203554	Pseudomonadota	Sutterella	Sutterella wadsworthensis	Gram-											2541437945| 2541437946
Veillonella sp. HPA0037	2541047010	Veillonellaceae	Negativicutes	Veillonellales	1203593	Bacillota	Veillonella	Veillonella sp. HPA0037	Gram-
Actinomyces sp. HPA0247	2541047011	Actinomycetaceae	Actinomycetes	Actinomycetales	1203556	Actinomycetota	Actinomyces	Actinomyces sp. HPA0247	Gram+						2541442851
Acidaminococcus sp. HPA0509	2541047012	Acidaminococcaceae	Negativicutes	Acidaminococcales	1203555	Bacillota	Acidaminococcus	Acidaminococcus sp. HPA0509	Gram-											2541443095| 2541445011
Streptococcus sp. HPH0090	2541047013	Streptococcaceae	Bacilli	Lactobacillales	1203590	Bacillota	Streptococcus	Streptococcus sp. HPH0090	Gram+						2541446317
Bifidobacterium breve HPH0326	2541047014	Bifidobacteriaceae	Actinomycetes	Bifidobacteriales	1203540	Actinomycetota	Bifidobacterium	Bifidobacterium breve	Gram+							2541448261
Dermabacter sp. HFH0086	2541047015	Dermabacteraceae	Actinomycetes	Micrococcales	1203568	Actinomycetota	Dermabacter	Dermabacter sp. HFH0086	Gram+		2541449292	2541449293	2541449294		2541450884	2541450378				2541450493| 2541449580
Propionibacterium sp. HGH0353	2541047016	Propionibacteriaceae	Actinomycetes	Propionibacteriales	1203571	Actinomycetota	Propionibacterium	Propionibacterium sp. HGH0353	Gram+						2541453526	2541452236
Streptomyces sp. HPH0547	2541047017	Streptomycetaceae	Actinomycetes	Kitasatosporales	1203592	Actinomycetota	Streptomyces	Streptomyces sp. HPH0547	Gram+						2541457318| 2541455553					2541459894
Atopobium sp. oral taxon 199 F0494	2541047018	Atopobiaceae	Coriobacteriia	Coriobacteriales	1203602	Actinomycetota	Atopobium	Atopobium sp. oral taxon 199	Gram+							2541461208																					2541461387	2541461386
Capnocytophaga sp. oral taxon 336 F0502	2541047019	Flavobacteriaceae	Flavobacteriia	Flavobacteriales	1203603	Bacteroidota	Capnocytophaga	Capnocytophaga sp. oral taxon 336	Gram-
Microbacterium sp. oral taxon 186 F0373	2541047020	Microbacteriaceae	Actinomycetes	Micrococcales	1203549	Actinomycetota	Microbacterium	Microbacterium sp. oral taxon 186	Gram+		2541465295	2541465296	2541465297	2541465294	2541465521					2541465622										2541465234	2541465233				2541466906	2541466907
Propionibacterium sp. oral taxon 192 F0372	2541047021	Propionibacteriaceae	Actinomycetes	Propionibacteriales	1203605	Actinomycetota	Propionibacterium	Propionibacterium sp. oral taxon 192	Gram+											2541468534
Streptococcus intermedius ATCC 27335	2541047048	Streptococcaceae	Bacilli	Lactobacillales	1095731	Bacillota	Streptococcus	Streptococcus intermedius	Gram+						2541582268
Bifidobacterium bifidum ATCC 29521	2541047090	Bifidobacteriaceae	Actinomycetes	Bifidobacteriales	500634	Actinomycetota	Bifidobacterium	Bifidobacterium bifidum	Gram+							2541796581
Actinobaculum sp. P1 oral taxon 183 F0552	2541047092	Actinomycetaceae	Actinomycetes	Actinomycetales	1227261	Actinomycetota	Actinobaculum	Actinobaculum sp. oral taxon 183	Gram+							2541803313	2541802593	2541802592|2541802594	2541802591	2541804563
Aggregatibacter sp. oral taxon 458 W10330	2541047094	Pasteurellaceae	Gammaproteobacteria	Pasteurellales	1321772	Pseudomonadota	Aggregatibacter	Aggregatibacter sp. oral taxon 458	Gram-											2541812563									2541811308								2541811747	2541811746
Atopobium sp. oral Taxon 810 F0209	2541047095	Atopobiaceae	Coriobacteriia	Coriobacteriales	1321773	Actinomycetota	Atopobium	Atopobium sp. oral taxon 810	Gram+							2541814422
Alloscardovia omnicolens F0580	2541047096	Bifidobacteriaceae	Actinomycetes	Bifidobacteriales	1321816	Actinomycetota	Alloscardovia	Alloscardovia omnicolens	Gram+							2541815069
Staphylococcus epidermidis E13A	2541047104	Staphylococcaceae	Bacilli	Bacillales	1115805	Bacillota	Staphylococcus	Staphylococcus epidermidis	Gram+						2541856279		2541856267|2541857575	2541856270|2541857578|2541857576|2541856268	2541856269|2541857577	2541857432| 2541856029| 2541855914										2541857429	2541857430
Streptococcus pyogenes UTSW-2	2541047106	Streptococcaceae	Bacilli	Lactobacillales	1115810	Bacillota	Streptococcus	Streptococcus pyogenes	Gram+							2541864327																					2541864188	2541864187
Streptococcus pyogenes UTMEM-1	2541047107	Streptococcaceae	Bacilli	Lactobacillales	1115811	Bacillota	Streptococcus	Streptococcus pyogenes	Gram+							2541866306
Streptococcus pyogenes GA41345	2541047108	Streptococcaceae	Bacilli	Lactobacillales	1115813	Bacillota	Streptococcus	Streptococcus pyogenes	Gram+							2541867836
Streptococcus pyogenes GA40634	2541047109	Streptococcaceae	Bacilli	Lactobacillales	1115814	Bacillota	Streptococcus	Streptococcus pyogenes	Gram+							2541869638
Streptococcus pyogenes GA19681	2541047110	Streptococcaceae	Bacilli	Lactobacillales	1115815	Bacillota	Streptococcus	Streptococcus pyogenes	Gram+							2541871455
Helicobacter pylori GAM117Ai	2541047162	Helicobacteraceae	Epsilonproteobacteria	Campylobacterales	1159026	Campylobacterota	Helicobacter	Helicobacter pylori	Gram-																				2542041768
Blautia sp. KLE 1732	2541047504	Lachnospiraceae	Clostridia	Lachnospirales	1226324	Bacillota	Blautia	Blautia sp. KLE 1732	Gram+																				2543265091
Actinomyces johnsonii F0510	2541047505	Actinomycetaceae	Actinomycetes	Actinomycetales	1227262	Actinomycetota	Actinomyces	Actinomyces johnsonii	Gram+						2543268953		2543269321	2543269320	2543269319	2543269523| 2543268253
Actinomyces sp. oral taxon 877 F0543	2541047506	Actinomycetaceae	Actinomycetes	Actinomycetales	1227264	Actinomycetota	Actinomyces	Actinomyces sp. oral taxon 877	Gram+						2543272285
Gardnerella vaginalis JCP7275	2541047559	Bifidobacteriaceae	Actinomycetes	Bifidobacteriales	1261057	Actinomycetota	Gardnerella	Gardnerella vaginalis	Gram+							2543458369
Gardnerella vaginalis JCP7276	2541047560	Bifidobacteriaceae	Actinomycetes	Bifidobacteriales	1261058	Actinomycetota	Gardnerella	Gardnerella vaginalis	Gram+							2543459782
Gardnerella vaginalis JCP7659	2541047561	Bifidobacteriaceae	Actinomycetes	Bifidobacteriales	1261059	Actinomycetota	Gardnerella	Gardnerella pickettii	Gram+							2543461440
Gardnerella vaginalis JCP7672	2541047562	Bifidobacteriaceae	Actinomycetes	Bifidobacteriales	1261060	Actinomycetota	Gardnerella	Gardnerella vaginalis	Gram+							2543462160
Gardnerella vaginalis JCP7719	2541047563	Bifidobacteriaceae	Actinomycetes	Bifidobacteriales	1261061	Actinomycetota	Gardnerella	Gardnerella pickettii	Gram+							2543464861
Gardnerella vaginalis JCP8017A	2541047564	Bifidobacteriaceae	Actinomycetes	Bifidobacteriales	1261062	Actinomycetota	Gardnerella	Gardnerella pickettii	Gram+							2543465702
Gardnerella vaginalis JCP8017B	2541047565	Bifidobacteriaceae	Actinomycetes	Bifidobacteriales	1261063	Actinomycetota	Gardnerella	Gardnerella pickettii	Gram+							2543467328
Gardnerella vaginalis JCP8066	2541047566	Bifidobacteriaceae	Actinomycetes	Bifidobacteriales	1261064	Actinomycetota	Gardnerella	Gardnerella vaginalis	Gram+							2543469253
Gardnerella vaginalis JCP8070	2541047567	Bifidobacteriaceae	Actinomycetes	Bifidobacteriales	1261065	Actinomycetota	Gardnerella	Gardnerella vaginalis	Gram+							2543470895
Gardnerella vaginalis JCP8108	2541047568	Bifidobacteriaceae	Actinomycetes	Bifidobacteriales	1261066	Actinomycetota	Gardnerella	Gardnerella vaginalis	Gram+							2543472309
Gardnerella vaginalis JCP8151A	2541047569	Bifidobacteriaceae	Actinomycetes	Bifidobacteriales	1261067	Actinomycetota	Gardnerella	Gardnerella vaginalis	Gram+							2543473393
Gardnerella vaginalis JCP8151B	2541047570	Bifidobacteriaceae	Actinomycetes	Bifidobacteriales	1261068	Actinomycetota	Gardnerella	Gardnerella vaginalis	Gram+							2543475408
Gardnerella vaginalis JCP8481A	2541047571	Bifidobacteriaceae	Actinomycetes	Bifidobacteriales	1261069	Actinomycetota	Gardnerella	Gardnerella vaginalis	Gram+							2543476309
Gardnerella vaginalis JCP8481B	2541047572	Bifidobacteriaceae	Actinomycetes	Bifidobacteriales	1261070	Actinomycetota	Gardnerella	Gardnerella vaginalis	Gram+							2543477938
Gardnerella vaginalis JCP8522	2541047573	Bifidobacteriaceae	Actinomycetes	Bifidobacteriales	1261071	Actinomycetota	Gardnerella	Gardnerella vaginalis	Gram+							2543479257
Bifidobacterium breve JCP7499	2541047574	Bifidobacteriaceae	Actinomycetes	Bifidobacteriales	1261072	Actinomycetota	Bifidobacterium	Bifidobacterium breve	Gram+							2543481334
Actinomyces graevenitzii F0530	2541048001	Actinomycetaceae	Actinomycetes	Actinomycetales	1321817	Actinomycetota	Actinomyces	Actinomyces graevenitzii	Gram+						2545524813
Actinomyces johnsonii F0542	2541048002	Actinomycetaceae	Actinomycetes	Actinomycetales	1321818	Actinomycetota	Actinomyces	Actinomyces johnsonii	Gram+						2545528508		2541048002	2545527147	2545527146	2545527984| 2545525921
Actinomyces sp. oral taxon 172 F0311	2541048003	Actinomycetaceae	Actinomycetes	Actinomycetales	1321775	Actinomycetota	Actinomyces	Actinomyces sp. oral taxon 172	Gram+						2545530439
Bacteroides pyogenes F0041	2541048004	Bacteroidaceae	Bacteroidia	Bacteroidales	1321819	Bacteroidota	Bacteroides	Bacteroides pyogenes
Streptococcus pneumoniae PNI0006	2545824526	Streptococcaceae	Bacilli	Lactobacillales	1159088	Bacillota	Streptococcus	Streptococcus pneumoniae	Gram+																							2545911087	2545911086	2545911088			2545912009	2545912008
Streptococcus pneumoniae PCS8235	2545824628	Streptococcaceae	Bacilli	Lactobacillales	1159083	Bacillota	Streptococcus	Streptococcus pneumoniae	Gram+																							2546198791	2546198790	2546198792			2546199659	2546199658
Lactobacillus crispatus SJ-3C-US	2547132034	Lactobacillaceae	Bacilli	Lactobacillales	575598	Bacillota	Lactobacillus	Lactobacillus crispatus	Gram+							2547144671| 2547144280
Coprobacillus cateniformis D6	2547132035	Coprobacillaceae	Erysipelotrichia	Erysipelotrichales	100884	Bacillota	Coprobacillus	Coprobacillus cateniformis	Gram+		2547148406	2547148407	2547148408							2547149493																	2547148392	2547148391
Lactobacillus gasseri SJ-9E-US	2547132036	Lactobacillaceae	Bacilli	Lactobacillales	575603	Bacillota	Lactobacillus	Lactobacillus gasseri	Gram+							2547151448| 2547151449																					2547150308	2547150309
Lactobacillus gasseri SV-16A-US	2547132037	Lactobacillaceae	Bacilli	Lactobacillales	575604	Bacillota	Lactobacillus	Lactobacillus gasseri	Gram+							2547153401| 2547153400
Klebsiella oxytoca 10-5248	2547132040	Enterobacteriaceae	Gammaproteobacteria	Enterobacterales	883123	Pseudomonadota	Klebsiella	Klebsiella oxytoca	Gram-							2547167757				2547171685
Bacteroides finegoldii CL09T03C10	2547132079	Bacteroidaceae	Bacteroidia	Bacteroidales	997888	Bacteroidota	Bacteroides	Bacteroides finegoldii	Gram-		2547284500	2547284499	2547284498				2547282180	2547282179	2547282178
Fusobacterium nucleatum animalis 4_8	2554235311	Fusobacteriaceae	Fusobacteriia	Fusobacteriales	469607	Fusobacteriota	Fusobacterium	Fusobacterium animalis	Gram-																												2555602503	2555602502
Fusobacterium nucleatum vincentii 3_1_36A2	2554235746	Fusobacteriaceae	Fusobacteriia	Fusobacteriales	469604	Fusobacteriota	Fusobacterium	Fusobacterium vincentii	Gram-
Bacteroides sp. 3_2_5	2558309115	Bacteroidaceae	Bacteroidia	Bacteroidales	457392	Bacteroidota	Bacteroides	Bacteroides sp. 3_2_5	Gram-
Eubacterium nodatum ATCC 33099	2558860175	Anaerovoracaceae	Clostridia	Peptostreptococcales	1161902	Bacillota	unclassified	[Eubacterium] nodatum	Gram+
Campylobacter ureolyticus ACS-301-V-Sch3b	2558860176	Campylobacteraceae	Epsilonproteobacteria	Campylobacterales	883165	Campylobacterota	Campylobacter	Campylobacter ureolyticus	Gram+											2559080978
Treponema denticola ATCC 33521	2558860187	Treponemataceae	Spirochaetia	Spirochaetales	999429	Spirochaetota	Treponema	Treponema denticola	Gram-											2559106204
Treponema denticola ATCC 33520	2558860188	Treponemataceae	Spirochaetia	Spirochaetales	999428	Spirochaetota	Treponema	Treponema denticola	Gram-											2559109011
Treponema denticola SP37	2558860189	Treponemataceae	Spirochaetia	Spirochaetales	999438	Spirochaetota	Treponema	Treponema denticola	Gram-											2559111607
Treponema denticola MYR-T	2558860190	Treponemataceae	Spirochaetia	Spirochaetales	999433	Spirochaetota	Treponema	Treponema denticola	Gram-											2559114214
Treponema denticola SP33	2558860191	Treponemataceae	Spirochaetia	Spirochaetales	999437	Spirochaetota	Treponema	Treponema denticola	Gram-											2559117139| 2559115452
Streptococcus anginosus CCUG 39159	2558860192	Streptococcaceae	Bacilli	Lactobacillales	1095729	Bacillota	Streptococcus	Streptococcus anginosus	Gram+						2559118837
Fusobacterium nucleatum 13_3C	2558860247	Fusobacteriaceae	Fusobacteriia	Fusobacteriales	1357398	Fusobacteriota	Fusobacterium	Fusobacterium nucleatum
Helicobacter macacae MIT 99-5501	2558860248	Helicobacteraceae	Epsilonproteobacteria	Campylobacterales	1357400	Campylobacterota	Helicobacter	Helicobacter macacae
Helicobacter canis NCTC 12740	2558860249	Helicobacteraceae	Epsilonproteobacteria	Campylobacterales	1357399	Campylobacterota	Helicobacter	Helicobacter canis
Cetobacterium somerae ATCC BAA-474	2558860278	Fusobacteriaceae	Fusobacteriia	Fusobacteriales	1319815	Fusobacteriota	Cetobacterium	Cetobacterium somerae	Gram-							2559418627				2559418111| 2559418475									2559418766
Faecalitalea cylindroides ATCC 27803	2558860279	Erysipelotrichaceae	Erysipelotrichia	Erysipelotrichales	649755	Bacillota	Faecalitalea	Faecalitalea cylindroides	Gram+
Porphyromonas catoniae ATCC 51270	2558860281	Porphyromonadaceae	Bacteroidia	Bacteroidales	887901	Bacteroidota	Porphyromonas	Porphyromonas catoniae	Gram-
Mogibacterium timidum ATCC 33093	2558860283	Anaerovoracaceae	Clostridia	Peptostreptococcales	1401079	Bacillota	Mogibacterium	Mogibacterium timidum	Gram+											2559438165
Rothia aeria F0184	2558860284	Micrococcaceae	Actinomycetes	Micrococcales	888019	Actinomycetota	Rothia	Rothia aeria	Gram+						2559441358					2559440415
Eubacterium brachy ATCC 33089	2558860285	Anaerovoracaceae	Clostridia	Peptostreptococcales	1321814	Bacillota	unclassified	[Eubacterium] brachy	Gram+																												2559442627	2559442626
Eubacterium sulci ATCC 35585	2558860286	Anaerovoracaceae	Clostridia	Peptostreptococcales	888727	Bacillota	unclassified	[Eubacterium] sulci	Gram+
Leptotrichia sp. oral taxon 225 F0581	2558860287	Leptotrichiaceae	Fusobacteriia	Fusobacteriales	1321774	Fusobacteriota	Leptotrichia	Leptotrichia sp. oral taxon 225	Gram-
Enterococcus faecalis E12	2558860353	Enterococcaceae	Bacilli	Lactobacillales	1115807	Bacillota	Enterococcus	Enterococcus faecalis	Gram+						2559604510	2559604499	2559604505	2559604508|2559604506	2559604507
Eikenella corrodens CC92I	2558860355	Neisseriaceae	Betaproteobacteria	Neisseriales	1073362	Pseudomonadota	Eikenella	Eikenella corrodens	Gram+																				2559611193
Streptococcus parasanguinis CC87K	2558860356	Streptococcaceae	Bacilli	Lactobacillales	1073372	Bacillota	Streptococcus	Streptococcus parasanguinis	Gram+						2559613034																	2559612625	2559612626	2559612624
Hoylesella oralis CC98A	2558860357	Prevotellaceae	Bacteroidia	Bacteroidales	1073367	Bacteroidota	Hoylesella	Hoylesella oralis	Gram-
Streptococcus sanguinis CC94A	2558860358	Streptococcaceae	Bacilli	Lactobacillales	1073373	Bacillota	Streptococcus	Streptococcus sanguinis	Gram+
Ruminococcus gnavus CC55_001C	2558860359	Lachnospiraceae	Clostridia	Lachnospirales	1073375	Bacillota	Mediterraneibacter	Mediterraneibacter gnavus	Gram+		2559621559	2559621558	2559621557
Mediterraneibacter lactaris CC59_002D	2558860360	Lachnospiraceae	Clostridia	Lachnospirales	1073376	Bacillota	Mediterraneibacter	[Ruminococcus] lactaris	Gram+
Pseudomonas aeruginosa Stone 130	2558860367	Pseudomonadaceae	Gammaproteobacteria	Pseudomonadales	1125697	Pseudomonadota	Pseudomonas	Pseudomonas aeruginosa	Gram-							2559653297				2559651839| 2559656760| 2559656098
Pseudomonas sp. P179	2558860368	Pseudomonadaceae	Gammaproteobacteria	Pseudomonadales	1125698	Pseudomonadota	Pseudomonas	Pseudomonas sp. P179	Gram-							2559661336				2559660024| 2559659935| 2559658700
Streptococcus pyogenes GA41046	2558860369	Streptococcaceae	Bacilli	Lactobacillales	1115812	Bacillota	Streptococcus	Streptococcus pyogenes	Gram+							2559664470																					2559663257	2559663258
Streptococcus pyogenes GA06023	2558860370	Streptococcaceae	Bacilli	Lactobacillales	1115816	Bacillota	Streptococcus	Streptococcus pyogenes	Gram+							2559667125																					2559666632	2559666631
Streptococcus pyogenes GA40468	2558860371	Streptococcaceae	Bacilli	Lactobacillales	1115817	Bacillota	Streptococcus	Streptococcus pyogenes	Gram+							2559667468
Streptococcus pyogenes GA19700	2558860372	Streptococcaceae	Bacilli	Lactobacillales	1115818	Bacillota	Streptococcus	Streptococcus pyogenes	Gram+							2559671603
Streptococcus pyogenes GA41039	2558860373	Streptococcaceae	Bacilli	Lactobacillales	1115819	Bacillota	Streptococcus	Streptococcus pyogenes	Gram+							2559671983
Streptococcus pyogenes GA41208	2558860374	Streptococcaceae	Bacilli	Lactobacillales	1115820	Bacillota	Streptococcus	Streptococcus pyogenes	Gram+							2559674103																					2559675347	2559675348
Streptococcus pyogenes GA40056	2558860375	Streptococcaceae	Bacilli	Lactobacillales	1115821	Bacillota	Streptococcus	Streptococcus pyogenes	Gram+							2559676285																					2559677483	2559677482
Streptococcus pyogenes GA41394	2558860376	Streptococcaceae	Bacilli	Lactobacillales	1115822	Bacillota	Streptococcus	Streptococcus pyogenes	Gram+							2559678268
Streptococcus pyogenes GA40377	2558860377	Streptococcaceae	Bacilli	Lactobacillales	1115823	Bacillota	Streptococcus	Streptococcus pyogenes	Gram+							2559681149																					2559680872	2559680871
Streptococcus pyogenes GA03805	2558860378	Streptococcaceae	Bacilli	Lactobacillales	1115824	Bacillota	Streptococcus	Streptococcus pyogenes	Gram+							2559681552
Streptococcus pyogenes GA03455	2558860379	Streptococcaceae	Bacilli	Lactobacillales	1115825	Bacillota	Streptococcus	Streptococcus pyogenes	Gram+							2559683605
Streptococcus pyogenes GA03799	2558860380	Streptococcaceae	Bacilli	Lactobacillales	1115826	Bacillota	Streptococcus	Streptococcus pyogenes	Gram+							2559686257																					2559686803	2559686802
Streptococcus pyogenes GA40884	2558860381	Streptococcaceae	Bacilli	Lactobacillales	1115827	Bacillota	Streptococcus	Streptococcus pyogenes	Gram+							2559687603																					2559687735	2559687734
Streptococcus pyogenes GA03747	2558860382	Streptococcaceae	Bacilli	Lactobacillales	1115828	Bacillota	Streptococcus	Streptococcus pyogenes	Gram+							2559690380																					2559688822	2559688821
Streptococcus pyogenes GA19702	2558860383	Streptococcaceae	Bacilli	Lactobacillales	1115829	Bacillota	Streptococcus	Streptococcus pyogenes	Gram+							2559692296
Streptococcus pyogenes GA16797	2558860384	Streptococcaceae	Bacilli	Lactobacillales	1115830	Bacillota	Streptococcus	Streptococcus pyogenes	Gram+							2559692972
Acidaminococcus sp. BV3L6	2558860385	Acidaminococcaceae	Negativicutes	Acidaminococcales	1111120	Bacillota	Acidaminococcus	Acidaminococcus sp. BV3L6	Gram-											2559694403
Atopobium sp. BV3AC4	2558860386	Atopobiaceae	Coriobacteriia	Coriobacteriales	1111121	Actinomycetota	Atopobium	Atopobium sp. BV3Ac4	Gram+							2559697916
Coriobacteriaceae bacterium BV3AC1	2558860387	Coriobacteriaceae	Coriobacteriia	Coriobacteriales	1111135	Actinomycetota	unclassified	Coriobacteriaceae bacterium BV3Ac1	Gram+							2559698871
Jonquetella sp. BV3C21	2558860388	Dethiosulfovibrionaceae	Synergistia	Synergistales	1111126	Synergistota	Jonquetella	Jonquetella sp. BV3C21	Gram-											2559700138
Megasphaera vaginalis BV3C16-1	2558860389	Veillonellaceae	Negativicutes	Veillonellales	1111454	Bacillota	Megasphaera	Megasphaera vaginalis (ex Srinivasan et al. 2021)	Gram-		2559701992	2559701991	2559701989		2559701733																						2559701610	2559701609
Peptoniphilus sp. BV3AC2	2558860390	Peptoniphilaceae	Tissierellia	Tissierellales	1111133	Bacillota	Peptoniphilus	Peptoniphilus sp. BV3AC2	Gram+
Peptoniphilus sp. BV3C26	2558860391	Peptoniphilaceae	Tissierellia	Tissierellales	1111134	Bacillota	Peptoniphilus	Peptoniphilus sp. BV3C26	Gram+
Prevotella sp. BV3P1	2558860392	Prevotellaceae	Bacteroidia	Bacteroidales	1111130	Bacteroidota	Prevotella	Prevotella sp. BV3P1	Gram-											2559707525
Propionimicrobium sp. BV2F7	2558860393	Propionibacteriaceae	Actinomycetes	Propionibacteriales	1111131	Actinomycetota	Propionimicrobium	Propionimicrobium sp. BV2F7	Gram+											2559710499
Streptococcus agalactiae BV3L5	2558860394	Streptococcaceae	Bacilli	Lactobacillales	1161427	Bacillota	Streptococcus	Streptococcus agalactiae	Gram+							2559711818				2559713195
Corynebacterium sp. KPL1824	2558860395	Corynebacteriaceae	Actinomycetes	Mycobacteriales	1203561	Actinomycetota	Corynebacterium	Corynebacterium sp. KPL1824	Gram+											2559715934| 2559714568| 2559714914| 2559714173										2559714174	2559714172				2559716159	2559716161
Staphylococcus aureus KPL1828	2558860396	Staphylococcaceae	Bacilli	Bacillales	1203552	Bacillota	Staphylococcus	Staphylococcus aureus	Gram+						2559717222					2559717052| 2559718261| 2559717465
Propionibacterium sp. KPL1838	2558860397	Propionibacteriaceae	Actinomycetes	Propionibacteriales	1203572	Actinomycetota	Propionibacterium	Propionibacterium sp. KPL1838	Gram+		2559719473	2559719472	2559719471	2559719474	2559720682	2559719748	2559721293	2559721294	2559721295																2559720786	2559720785
Propionibacterium sp. KPL1844	2558860398	Propionibacteriaceae	Actinomycetes	Propionibacteriales	1203573	Actinomycetota	Propionibacterium	Propionibacterium sp. KPL1844	Gram+		2559722232	2559722231	2559722230	2559722233		2559722044	2559721464	2559721463	2559721462																2559723110	2559723109
Staphylococcus aureus KPL1845	2558860399	Staphylococcaceae	Bacilli	Bacillales	1203553	Bacillota	Staphylococcus	Staphylococcus aureus	Gram+		2559725679	2559725678	2559725677		2559724578		2559724586	2559724585|2559724583	2559724584	2559724750| 2559724333| 2559724032									2559725579	2559724746	2559724747
Propionibacterium sp. KPL1847	2558860400	Propionibacteriaceae	Actinomycetes	Propionibacteriales	1203574	Actinomycetota	Propionibacterium	Propionibacterium sp. KPL1847	Gram+		2559726345	2559726344	2559726343	2559726346	2559726947	2559728065	2559727389	2559727388	2559727387																2559726849	2559726850
Propionibacterium sp. KPL1849	2558860401	Propionibacteriaceae	Actinomycetes	Propionibacteriales	1203575	Actinomycetota	Propionibacterium	Propionibacterium sp. KPL1849	Gram+		2559729755	2559729754	2559729753	2559729756	2559728819	2559730407	2559728377	2559728378	2559728379																2559728917	2559728916
Propionibacterium sp. KPL1852	2558860402	Propionibacteriaceae	Actinomycetes	Propionibacteriales	1203576	Actinomycetota	Propionibacterium	Propionibacterium sp. KPL1852	Gram+						2559732335	2559731157
Propionibacterium sp. KPL1854	2558860403	Propionibacteriaceae	Actinomycetes	Propionibacteriales	1203577	Actinomycetota	Propionibacterium	Propionibacterium sp. KPL1854	Gram+						2559734034	2559735130
Corynebacterium sp. KPL1855	2558860404	Corynebacteriaceae	Actinomycetes	Mycobacteriales	1203562	Actinomycetota	Corynebacterium	Corynebacterium sp. KPL1855	Gram+											2559736410| 2559737543| 2559735523| 2559736523| 2559736857|										2559736858	2559736856				2559737337	2559737335
Corynebacterium sp. KPL1856	2558860405	Corynebacteriaceae	Actinomycetes	Mycobacteriales	1203563	Actinomycetota	Corynebacterium	Corynebacterium sp. KPL1856	Gram+											2559738992| 2559738571| 2559738884| 2559738231|									2559739059
Corynebacterium sp. KPL1857	2558860406	Corynebacteriaceae	Actinomycetes	Mycobacteriales	1203564	Actinomycetota	Corynebacterium	Corynebacterium sp. KPL1857	Gram+		2559740732	2559740731	2559740730	2559740733						2559742415| 2559742308| 2559740361| 2559740701|										2559740700	2559740702				2559741148	2559741146
Corynebacterium sp. KPL1859	2558860407	Corynebacteriaceae	Actinomycetes	Mycobacteriales	1203566	Actinomycetota	Corynebacterium	Corynebacterium sp. KPL1859	Gram+											2559744225| 2559744595| 2559743174| 2559744708| 2559743860|										2559743861	2559743859				2559743397	2559743399
Corynebacterium sp. KPL1860	2558860408	Corynebacteriaceae	Actinomycetes	Mycobacteriales	1203567	Actinomycetota	Corynebacterium	Corynebacterium sp. KPL1860	Gram+		2559745422	2559745423	2559745424	2559745421						2559747132| 2559745793| 2559747239| 2559745453|										2559745454	2559745452				2559745006	2559745008
Corynebacterium sp. KPL1986	2558860409	Corynebacteriaceae	Actinomycetes	Mycobacteriales	1203619	Actinomycetota	Corynebacterium	Corynebacterium sp. KPL1986	Gram+											2559748417| 2559749559| 2559747552| 2559747441| 2559749151
Corynebacterium sp. KPL1814	2558860410	Corynebacteriaceae	Actinomycetes	Mycobacteriales	1203557	Actinomycetota	Corynebacterium	Corynebacterium sp. KPL1814	Gram+											2559749952| 2559750801| 2559751903| 2559750688| 2559751236|										2559751237	2559751235				2559751517	2559751519
Corynebacterium sp. KPL1817	2558860411	Corynebacteriaceae	Actinomycetes	Mycobacteriales	1203558	Actinomycetota	Corynebacterium	Corynebacterium sp. KPL1817	Gram+		2559753196	2559753197	2559753198	2559753195						2559753987| 2559753567| 2559753878 2559753227									2559754055	2559753228	2559753226				2559754293	2559754295
Corynebacterium sp. KPL1818	2558860412	Corynebacteriaceae	Actinomycetes	Mycobacteriales	1203559	Actinomycetota	Corynebacterium	Corynebacterium sp. KPL1818	Gram+											2559756723| 2559755913| 2559755517| 2559756616| 2559755134									2559756778
Corynebacterium sp. KPL1821	2558860413	Corynebacteriaceae	Actinomycetes	Mycobacteriales	1203560	Actinomycetota	Corynebacterium	Corynebacterium sp. KPL1821	Gram+											2559758728| 2559759148| 2559759041| 2559758389									2559759215
Corynebacterium sp. KPL1989	2558860414	Corynebacteriaceae	Actinomycetes	Mycobacteriales	1203622	Actinomycetota	Corynebacterium	Corynebacterium sp. KPL1989	Gram+											2559760820| 2559759815| 2559761253| 2559759894										2559759895	2559759890				2559759675	2559759677
Corynebacterium sp. KPL1995	2558860415	Corynebacteriaceae	Actinomycetes	Mycobacteriales	1203624	Actinomycetota	Corynebacterium	Corynebacterium sp. KPL1995	Gram+											2559761947| 2559762947| 2559763610| 2559762027
Corynebacterium sp. KPL1996	2558860416	Corynebacteriaceae	Actinomycetes	Mycobacteriales	1203625	Actinomycetota	Corynebacterium	Corynebacterium sp. KPL1996	Gram+											2559764271| 2559764713| 2559765583| 2559764601| 2559763865									2559764772	2559763866	2559763864				2559765853	2559765855
Corynebacterium sp. KPL1998	2558860417	Corynebacteriaceae	Actinomycetes	Mycobacteriales	1203627	Actinomycetota	Corynebacterium	Corynebacterium sp. KPL1998	Gram+											2559766377| 2559767565| 2559768029| 2559768140| 2559766782										2559766781	2559766783				2559768299	2559768301
Propionibacterium sp. KPL2000	2558860418	Propionibacteriaceae	Actinomycetes	Propionibacteriales	1203629	Actinomycetota	Propionibacterium	Propionibacterium sp. KPL2000	Gram+						2559770360	2559769157
Propionibacterium sp. KPL2003	2558860419	Propionibacteriaceae	Actinomycetes	Propionibacteriales	1203631	Actinomycetota	Propionibacterium	Propionibacterium sp. KPL2003	Gram+		2559771102	2559771103	2559771104	2559771101	2559772045	2559773165	2559772486	2559772485	2559772484																2559771947	2559771948
Propionibacterium sp. KPL2009	2558860420	Propionibacteriaceae	Actinomycetes	Propionibacteriales	1203635	Actinomycetota	Propionibacterium	Propionibacterium sp. KPL2009	Gram+						2559774437	2559775528
Corynebacterium sp. KPL2004	2558860421	Corynebacteriaceae	Actinomycetes	Mycobacteriales	1203632	Actinomycetota	Corynebacterium	Corynebacterium sp. KPL2004	Gram+											2559776729| 2559777541| 2559776286| 2559777429| 2559775884|
Propionibacterium sp. KPL2005	2558860422	Propionibacteriaceae	Actinomycetes	Propionibacteriales	1203633	Actinomycetota	Propionibacterium	Propionibacterium sp. KPL2005	Gram+		2559779318	2559779319	2559779320	2559779317	2559780218	2559779019	2559778258	2559778257	2559778256																2559780115	2559780116
Propionibacterium sp. KPL2008	2558860423	Propionibacteriaceae	Actinomycetes	Propionibacteriales	1203634	Actinomycetota	Propionibacterium	Propionibacterium sp. KPL2008	Gram+						2559781651	2559782809
Olsenella profusa F0195, D221A-01	2558860424	Atopobiaceae	Coriobacteriia	Coriobacteriales	1125712	Actinomycetota	Olsenella	Olsenella profusa	Gram+							2559783519				2559784760																	2559784721	2559784720
Pseudomonas sp. HPB0071	2558860918	Pseudomonadaceae	Gammaproteobacteria	Pseudomonadales	1203578	Pseudomonadota	Pseudomonas	Pseudomonas sp. HPB0071	Gram-							2561320797				2561320487| 2561319837									2561321005
Actinomyces sp. ICM54	2558860919	Actinomycetaceae	Actinomycetes	Actinomycetales	936549	Actinomycetota	Actinomyces	Actinomyces sp. ICM54	Gram+						2561323988
Atopobium sp. BS2	2558860920	Atopobiaceae	Coriobacteriia	Coriobacteriales	936550	Actinomycetota	Atopobium	Atopobium sp. BS2	Gram+							2561325316
Atopobium sp. ICM42b	2558860921	Atopobiaceae	Coriobacteriia	Coriobacteriales	1190620	Actinomycetota	Atopobium	Atopobium sp. ICM42b	Gram+							2561327484
Bifidobacterium sp. MSTE12	2558860922	Bifidobacteriaceae	Actinomycetes	Bifidobacteriales	1161409	Actinomycetota	Bifidobacterium	Bifidobacterium sp. MSTE12	Gram+							2561329213
Lachnospiraceae bacterium MSX33	2558860923	Lachnospiraceae	Clostridia	Lachnospirales	936596	Bacillota	Lachnoanaerobaculum	Lachnoanaerobaculum sp. MSX33	Gram+											2561332522																	2561333078	2561333079
Fusobacterium sp. CM21	2558860924	Fusobacteriaceae	Fusobacteriia	Fusobacteriales	936562	Fusobacteriota	Fusobacterium	Fusobacterium sp. CM21	Gram-
Fusobacterium sp. CM1	2558860925	Fusobacteriaceae	Fusobacteriia	Fusobacteriales	936561	Fusobacteriota	Fusobacterium	Fusobacterium sp. CM1	Gram-																												2561336075	2561336076
Fusobacterium sp. CM22	2558860926	Fusobacteriaceae	Fusobacteriia	Fusobacteriales	936563	Fusobacteriota	Fusobacterium	Fusobacterium sp. CM22	Gram-
Fusobacterium sp. OBRC1	2558860927	Fusobacteriaceae	Fusobacteriia	Fusobacteriales	1032505	Fusobacteriota	Fusobacterium	Fusobacterium sp. OBRC1	Gram-																												2561340822	2561340823
Klebsiella sp. AS10	2558860928	Enterobacteriaceae	Gammaproteobacteria	Enterobacterales	936564	Pseudomonadota	Klebsiella	Klebsiella sp. AS10	Gram-							2561346704				2561344878
Olsenella uli MSTE5	2558860929	Atopobiaceae	Coriobacteriia	Coriobacteriales	1190621	Actinomycetota	Olsenella	Olsenella uli	Gram+							2561350833																					2561350896	2561350895
Veillonella sp. ICM51a	2558860930	Veillonellaceae	Negativicutes	Veillonellales	936591	Bacillota	Veillonella	Veillonella sp. ICM51a	Gram+
Prevotella sp. ICM33	2558860931	Prevotellaceae	Bacteroidia	Bacteroidales	1161412	Bacteroidota	Prevotella	Prevotella sp. ICM33	Gram-							2561355463
Shuttleworthia sp. MSX8B	2558860932	Lachnospiraceae	Clostridia	Lachnospirales	936574	Bacillota	Shuttleworthella	Shuttleworthella sp. MSX8B	Gram+																				2561356644
Streptococcus sp. AC15	2558860933	Streptococcaceae	Bacilli	Lactobacillales	936575	Bacillota	Streptococcus	Streptococcus sp. AC15	Gram+						2561359068																	2561359572	2561359571	2561359573
Streptococcus sp. ACC21	2558860934	Streptococcaceae	Bacilli	Lactobacillales	1161413	Bacillota	Streptococcus	Streptococcus sp. ACC21	Gram+						2561361114
Streptococcus sp. CM7	2558860935	Streptococcaceae	Bacilli	Lactobacillales	936581	Bacillota	Streptococcus	Streptococcus sp. CM7	Gram+						2561363140																	2561362786	2561362785	2561362787			2561363374	2561363375
Streptococcus sp. OBRC6	2558860936	Streptococcaceae	Bacilli	Lactobacillales	936587	Bacillota	Streptococcus	Streptococcus sp. OBRC6	Gram+						2561365540
Streptococcus sp. BS29a	2558860937	Streptococcaceae	Bacilli	Lactobacillales	1161415	Bacillota	Streptococcus	Streptococcus sp. BS29a	Gram+						2561367550
Streptococcus sp. AS20	2558860938	Streptococcaceae	Bacilli	Lactobacillales	936578	Bacillota	Streptococcus	Streptococcus sp. AS20	Gram+						2561368982																						2561369433	2561369432
Streptococcus sp. BS21	2558860939	Streptococcaceae	Bacilli	Lactobacillales	1161414	Bacillota	Streptococcus	Streptococcus sp. BS21	Gram+						2561370144																	2561370889	2561370890	2561370888
Streptococcus sp. CM6	2558860940	Streptococcaceae	Bacilli	Lactobacillales	936580	Bacillota	Streptococcus	Streptococcus sp. CM6	Gram+						2561371686																	2561371948	2561371949	2561371947
Streptococcus sp. ACS2	2558860941	Streptococcaceae	Bacilli	Lactobacillales	936576	Bacillota	Streptococcus	Streptococcus sp. ACS2	Gram+						2561375339					2561373900| 2561374895
Streptococcus sp. SR1	2558860942	Streptococcaceae	Bacilli	Lactobacillales	1161416	Bacillota	Streptococcus	Streptococcus sp. SR1	Gram+						2561377121																	2561376026	2561376025	2561376027
Streptococcus sp. SR4	2558860943	Streptococcaceae	Bacilli	Lactobacillales	1161417	Bacillota	Streptococcus	Streptococcus sp. SR4	Gram+						2561379233					2561379115
Veillonella sp. AS16	2558860944	Veillonellaceae	Negativicutes	Veillonellales	936589	Bacillota	Veillonella	Veillonella sp. AS16	Gram-											2561380425
Subdoligranulum variabile DSM 15176	2562617078	Oscillospiraceae	Clostridia	Eubacteriales	411471	Bacillota	Subdoligranulum	Subdoligranulum variabile	Gram+																				2562923925
Clostridium sp M62/1	2562617079	Clostridiaceae	Clostridia	Eubacteriales	411486	Bacillota	Clostridium	Clostridium sp. M62/1	Gram+											2562928699
Marvinbryantia formatexigens I-52	2562617090	Lachnospiraceae	Clostridia	Lachnospirales	168384	Bacillota	Marvinbryantia	Marvinbryantia formatexigens	Gram+
Fannyhessea vaginae DSM 15829	2562617091	Atopobiaceae	Coriobacteriia	Coriobacteriales	525256	Actinomycetota	Fannyhessea	Fannyhessea vaginae	Gram+							2562962032
Chryseobacterium gleum F93, ATCC 35910	2562617092	Weeksellaceae	Flavobacteriia	Flavobacteriales	525257	Bacteroidota	Chryseobacterium	Chryseobacterium gleum	Gram-							2562964432
Citrobacter youngae ATCC 29220	2562617093	Enterobacteriaceae	Gammaproteobacteria	Enterobacterales	500640	Pseudomonadota	Citrobacter	Citrobacter youngae	Gram-		2562969946	2562969947	2562969948	2562969945		2562972409	2562971784	2562971783	2562971782	2562968591| 2562971208				2562971959	2562971960	2562971219	2562971218		2562969623						2562968483	2562968482
Corynebacterium pseudogenitalium ATCC 33035	2562617094	Corynebacteriaceae	Actinomycetes	Mycobacteriales	525264	Actinomycetota	Corynebacterium	Corynebacterium pseudogenitalium	Gram+		2562973230	2562973231	2562973232							2562974781| 2562975263| 2562974644| 2562975096									2562974582	2562975095	2562975097				2562974093	2562974091
Fusobacterium ulcerans 12-1B	2562617095	Fusobacteriaceae	Fusobacteriia	Fusobacteriales	457404	Fusobacteriota	Fusobacterium	Fusobacterium ulcerans	Gram-											2562979025| 2562979278
Blautia hansenii VPI C7-24, DSM 20583	2562617096	Lachnospiraceae	Clostridia	Lachnospirales	537007	Bacillota	Blautia	Blautia hansenii	Gram+		2562981794	2562981793	2562981792							2562981865| 2562982146
Providencia rettgeri DSM 1131	2562617097	Morganellaceae	Gammaproteobacteria	Enterobacterales	521000	Pseudomonadota	Providencia	Providencia rettgeri	Gram-											2562983334| 2562985514| 2562985764| 2562985639
Ralstonia sp. 5_2_56FAA	2562617098	Burkholderiaceae	Betaproteobacteria	Burkholderiales	658080	Pseudomonadota	Ralstonia	Ralstonia sp. 5_2_56FAA	Gram+		2562989193	2562989192	2562989191	2562989194	2562989198	2562990593| 2562990486										2562989407	2562989406								2562990439	2562990440
Oribacterium parvum ACB1	2562617099	Lachnospiraceae	Clostridia	Lachnospirales	796943	Bacillota	Oribacterium	Oribacterium parvum	Gram+											2562992477
Peptoanaerobacter stomatis CM2	2562617100	Filifactoraceae	Clostridia	Peptostreptococcales	796937	Bacillota	Peptoanaerobacter	Peptoanaerobacter stomatis	Gram+											2562994839| 2562995723
Bacteroides finegoldii DSM 17565	2562617142	Bacteroidaceae	Bacteroidia	Bacteroidales	483215	Bacteroidota	Bacteroides	Bacteroides finegoldii	Gram-		2563196983|2563196510	2563196984|2563196511	2563196512|2563196985				2563196782	2563196783	2563196784
Bifidobacterium angulatum DSM 20098	2562617143	Bifidobacteriaceae	Actinomycetes	Bifidobacteriales	518635	Actinomycetota	Bifidobacterium	Bifidobacterium angulatum	Gram+							2563197328													2563197227
Bifidobacterium gallicum DSM 20093, LMG 11596	2562617144	Bifidobacteriaceae	Actinomycetes	Bifidobacteriales	561180	Actinomycetota	Bifidobacterium	Bifidobacterium gallicum	Gram+							2563200290
Bifidobacterium pseudocatenulatum DSM 20438, JCM 1200, LMG 10505	2562617145	Bifidobacteriaceae	Actinomycetes	Bifidobacteriales	547043	Actinomycetota	Bifidobacterium	Bifidobacterium pseudocatenulatum	Gram+							2563202788
Collinsella intestinalis DSM 13280	2562617146	Coriobacteriaceae	Coriobacteriia	Coriobacteriales	521003	Actinomycetota	Collinsella	Collinsella intestinalis	Gram+		2563203139	2563203140	2563203141			2563204287
Desulfovibrio sp. 3_1_syn3	2562617147	Desulfovibrionaceae	Desulfovibrionia	Desulfovibrionales	457398	Thermodesulfobacteriota	Desulfovibrio	Desulfovibrio sp. 3_1_syn3	Gram-		2563206584	2563206585	2563206586
Enterobacter cancerogenus ATCC 35316	2562617148	Enterobacteriaceae	Gammaproteobacteria	Enterobacterales	500639	Pseudomonadota	Enterobacter	Enterobacter cancerogenus	Gram-		2563210760	2563210759	2563210758			2563211096	2563211687|2563208981	2563211688|2563208982|2563208984	2563211689|2563208983	2563210631				2563211387	2563211388	2563208198	2563208199			2563210628	2563210629				2563209653	2563209654
Enterococcus faecalis TUSoD Ef11	2562617149	Enterococcaceae	Bacilli	Lactobacillales	553209	Bacillota	Enterococcus	Enterococcus faecalis	Gram+						2563213275	2563213264
Erysipelothrix rhusiopathiae ATCC 19414	2562617150	Erysipelotrichaceae	Erysipelotrichia	Erysipelotrichales	525280	Bacillota	Erysipelothrix	Erysipelothrix rhusiopathiae	Gram+								2563216322	2563216324|2563216323	2563216325
Escherichia sp. 4_1_40B	2562617151	Enterobacteriaceae	Gammaproteobacteria	Enterobacterales	457401	Pseudomonadota	Escherichia	Escherichia sp. 4_1_40B	Gram-		2563218396	2563218395	2563218394			2563221333	2563220454|2563219916	2563220455|2563219917|2563219915	2563220456|2563219918	2563219564| 2563218026| 2563217769				2563221735	2563221734	2563217776	2563217775		2563218824	2563218023	2563218024				2563219659	2563219660
Fusobacterium nucleatum animalis 3_1_33	2562617153	Fusobacteriaceae	Fusobacteriia	Fusobacteriales	469603	Fusobacteriota	Fusobacterium	Fusobacterium animalis	Gram-
Fusobacterium ulcerans ATCC 49185	2562617154	Fusobacteriaceae	Fusobacteriia	Fusobacteriales	469617	Fusobacteriota	Fusobacterium	Fusobacterium ulcerans	Gram-		2563227650	2563227649	2563227648				2563229044	2563229045	2563229046																		2563228459	2563228458
Helicobacter bilis ATCC 43879	2562617155	Helicobacteraceae	Epsilonproteobacteria	Campylobacterales	613026	Campylobacterota	Helicobacter	Helicobacter bilis	Gram-
Lactobacillus paragasseri JV-V03	2562617156	Lactobacillaceae	Bacilli	Lactobacillales	525326	Bacillota	Lactobacillus	Lactobacillus paragasseri	Gram+							2563233347| 2563233348																					2563232880	2563232879
Listeria grayi DSM 20601	2562617157	Listeriaceae	Bacilli	Bacillales	525367	Bacillota	Listeria	Listeria grayi	Gram+						2563235591		2563236336|2563235881|2563236322	2563235882|2563236337|2563236323|2563236325	2563235883|2563236338|2563236324																		2563236328	2563236327
Mitsuokella multacida DSM 20544	2562617158	Selenomonadaceae	Negativicutes	Selenomonadales	500635	Bacillota	Mitsuokella	Mitsuokella multacida	Gram-											2563236983									2563238358
Roseburia intestinalis L1-82	2562617159	Lachnospiraceae	Clostridia	Lachnospirales	536231	Bacillota	Roseburia	Roseburia intestinalis	Gram+
Ruminococcus sp. 5_1_39BFAA	2562617160	Oscillospiraceae	Clostridia	Eubacteriales	457412	Bacillota	Ruminococcus	Ruminococcus sp. 5_1_39BFAA	Gram+
Erysipelotrichaceae bacterium 5_2_54FAA	2562617161	Erysipelotrichaceae	Erysipelotrichia	Erysipelotrichales	552396	Bacillota	unclassified	Erysipelotrichaceae bacterium 5_2_54FAA	Gram+																												2563247696	2563247697
Enterobacteriaceae bacterium 9_2_54FAA	2562617162	Enterobacteriaceae	Gammaproteobacteria	Enterobacterales	469613	Pseudomonadota	unclassified	Enterobacteriaceae bacterium 9_2_54FAA	Gram-		2563254115	2563254116	2563254117	2563254114		2563254506	2563253922|2563254020	2563253923|2563254019|2563254021	2563253924|2563254022	2563251340				2563251737	2563251736	2563251846	2563251845
Prevotella copri CB7, DSM 18205	2562617166	Prevotellaceae	Bacteroidia	Bacteroidales	537011	Bacteroidota	Segatella	Segatella copri	Gram-							2563257739
Neisseria subflava NJ9703	2562617167	Neisseriaceae	Betaproteobacteria	Neisseriales	546268	Pseudomonadota	Neisseria	Neisseria subflava	Gram-											2563261695
Neisseria lactamica ATCC 23970	2562617168	Neisseriaceae	Betaproteobacteria	Neisseriales	546265	Pseudomonadota	Neisseria	Neisseria lactamica	Gram-											2563264561
Neisseria cinerea ATCC 14685	2562617169	Neisseriaceae	Betaproteobacteria	Neisseriales	546262	Pseudomonadota	Neisseria	Neisseria cinerea	Gram-																				2563267617
Lactobacillus gasseri MV-22	2562617170	Lactobacillaceae	Bacilli	Lactobacillales	559301	Bacillota	Lactobacillus	Lactobacillus gasseri	Gram+							2563270264| 2563270265
Lactobacillus jensenii 1153	2562617171	Lactobacillaceae	Bacilli	Lactobacillales	440497	Bacillota	Lactobacillus	Lactobacillus jensenii	Gram+							2563271915
Acinetobacter sp. RUH 2624	2562617172	Moraxellaceae	Gammaproteobacteria	Moraxellales	575564	Pseudomonadota	Acinetobacter	Acinetobacter sp. RUH 2624	Gram-		2563274098	2563274097	2563274096			2563275218				2563272635| 2563272724| 2563272725| 2563275269|										2563272721	2563272722				2563272590	2563272591
Bacteroides sp. D2	2562617173	Bacteroidaceae	Bacteroidia	Bacteroidales	556259	Bacteroidota	Bacteroides	Bacteroides sp. D2	Gram-		2563278202	2563278201	2563278200				2563279203	2563279204	2563279205
Acinetobacter baumannii 6013113	2562617174	Moraxellaceae	Gammaproteobacteria	Moraxellales	592014	Pseudomonadota	Acinetobacter	Acinetobacter baumannii	Gram-		2563282560	2563282561	2563282562			2563283716				2563283374| 2563283763| 2563284856| 2563284857|										2563284860	2563284859				2563282888	2563282887
Acinetobacter baumannii 6014059	2562617175	Moraxellaceae	Gammaproteobacteria	Moraxellales	525242	Pseudomonadota	Acinetobacter	Acinetobacter baumannii	Gram-		2563287580	2563287579	2563287578			2563287499				2563289451| 2563287898| 2563286774| 2563286775| 2563287899| 2563286066										2563286771	2563286772				2563285918	2563285919
Bilophila wadsworthia 3_1_6	2562617176	Desulfovibrionaceae	Desulfovibrionia	Desulfovibrionales	563192	Thermodesulfobacteriota	Bilophila	Bilophila wadsworthia	Gram-		2563290610	2563290609	2563290608							2563293479| 2563292527| 2563293338| 2563289983
Abiotrophia defectiva ATCC 49176	2562617177	Aerococcaceae	Bacilli	Lactobacillales	592010	Bacillota	Abiotrophia	Abiotrophia defectiva	Gram+
Staphylococcus aureus aureus TCH70	2562617178	Staphylococcaceae	Bacilli	Bacillales	548475	Bacillota	Staphylococcus	Staphylococcus aureus	Gram+		2563295645	2563295646	2563295647	2563295644	2563295930		2563295922	2563295923|2563295925	2563295924	2563295750| 2563297293| 2563296184										2563295754	2563295753
Sphingobacterium spiritivorum ATCC 33861	2562617179	Sphingobacteriaceae	Sphingobacteriia	Sphingobacteriales	525373	Bacteroidota	Sphingobacterium	Sphingobacterium spiritivorum	Gram-							2563300655				2563302419
Fusobacterium necrophorum D12	2562617180	Fusobacteriaceae	Fusobacteriia	Fusobacteriales	556263	Fusobacteriota	Fusobacterium	Fusobacterium necrophorum	Gram-								2563302987	2563302988	2563302989
Lactiplantibacillus plantarum ATCC 14917	2562617181	Lactobacillaceae	Bacilli	Lactobacillales	525338	Bacillota	Lactiplantibacillus	Lactiplantibacillus plantarum	Gram+						2563305760	2563307171| 2563307832				2563304950
Ligilactobacillus ruminis ATCC 25644	2562617182	Lactobacillaceae	Bacilli	Lactobacillales	525362	Bacillota	Ligilactobacillus	Ligilactobacillus ruminis	Gram+						2563308906					2563310089
Ruminococcaceae bacterium D16	2562617183	Oscillospiraceae	Clostridia	Eubacteriales	552398	Bacillota	unclassified	Ruminococcaceae bacterium D16	Gram+		2563312034	2563312035	2563312036
Actinomyces viscosus C505	2562617184	Actinomycetaceae	Actinomycetes	Actinomycetales	562973	Actinomycetota	Actinomyces	Actinomyces viscosus	Gram+						2563313801					2563314180| 2563315631
Gemella sanguinis M325	2562617185	Gemellaceae	Bacilli	Bacillales	562983	Bacillota	Gemella	Gemella sanguinis	Gram+							2563317810
Neisseria mucosa M26, ATCC 25996	2562617186	Neisseriaceae	Betaproteobacteria	Neisseriales	546266	Pseudomonadota	Neisseria	Neisseria mucosa	Gram-											2563319011
Simonsiella muelleri ATCC 29453	2562617187	Neisseriaceae	Betaproteobacteria	Neisseriales	641147	Pseudomonadota	Simonsiella	Simonsiella muelleri	Gram+											2563321794																	2563323261	2563323262
Lachnospiraceae bacterium 3_1_57FAA_CT1	2562617188	Lachnospiraceae	Clostridia	Lachnospirales	658086	Bacillota	unclassified	Lachnospiraceae bacterium 3_1_57FAA_CT1	Gram+
Segniliparus rugosus ATCC BAA-974	2562617189	Segniliparaceae	Actinomycetes	Mycobacteriales	679197	Actinomycetota	Segniliparus	Segniliparus rugosus	Gram+		2563332615	2563332616	2563332617	2563332614	2563332691| 2563331735	2563333358				2563332214	2563330657	2563330656	2563330655
Lachnospiraceae bacterium 2_1_46FAA	2562617190	Lachnospiraceae	Clostridia	Lachnospirales	742723	Bacillota	unclassified	Lachnospiraceae bacterium 2_1_46FAA	Gram+		2563333574	2563333573	2563333572
Aneurinibacillus aneurinilyticus ATCC 12856	2563366762	Paenibacillaceae	Bacilli	Bacillales	649747	Bacillota	Aneurinibacillus	Aneurinibacillus aneurinilyticus	Gram+		2563973200	2563973199	2563973198	2563973201	2563973743| 2563976381		2563975117	2563975123|2563975124|2563975118|2563975120	2563975119	2563976686| 2563975629												2563976463	2563976462	2563976464
Prevotella nigrescens CC14M	2563366765	Prevotellaceae	Bacteroidia	Bacteroidales	1073366	Bacteroidota	Prevotella	Prevotella nigrescens	Gram-
Fusobacterium nucleatum CTI-1	2563366770	Fusobacteriaceae	Fusobacteriia	Fusobacteriales	1204474	Fusobacteriota	Fusobacterium	Fusobacterium nucleatum	Gram-
Fusobacterium nucleatum CTI-2	2563366771	Fusobacteriaceae	Fusobacteriia	Fusobacteriales	1204475	Fusobacteriota	Fusobacterium	Fusobacterium nucleatum	Gram-																												2564011084	2564011085
Fusobacterium nucleatum CTI-3	2563366772	Fusobacteriaceae	Fusobacteriia	Fusobacteriales	1204476	Fusobacteriota	Fusobacterium	Fusobacterium nucleatum	Gram-
Providencia alcalifaciens F90-2004	2563367180	Morganellaceae	Gammaproteobacteria	Enterobacterales	1256987	Pseudomonadota	Providencia	Providencia alcalifaciens	Gram-											2565745270| 2565747588
Providencia alcalifaciens 205/92	2563367181	Morganellaceae	Gammaproteobacteria	Enterobacterales	1256988	Pseudomonadota	Providencia	Providencia alcalifaciens	Gram-		2565748518	2565748517	2565748516	2565748519						2565750380| 2565748830				2565747962	2565747961					2565748833	2565748832
Providencia alcalifaciens R90-1475	2563367182	Morganellaceae	Gammaproteobacteria	Enterobacterales	1256989	Pseudomonadota	Providencia	Providencia alcalifaciens	Gram-											2565754131| 2565754668| 2565752209
Providencia alcalifaciens RIMD 1656011	2563367183	Morganellaceae	Gammaproteobacteria	Enterobacterales	1256990	Pseudomonadota	Providencia	Providencia alcalifaciens	Gram-											2565757475| 2565757110									2565757044
Providencia alcalifaciens PAL-1	2563367184	Morganellaceae	Gammaproteobacteria	Enterobacterales	1256991	Pseudomonadota	Providencia	Providencia alcalifaciens	Gram-		2565761609	2565761610	2565761611	2565761608						2565761363| 2565760861| 2565761179| 2565761404				2565762838	2565762839				2565760935	2565760858	2565760859
Providencia alcalifaciens PAL-2	2563367185	Morganellaceae	Gammaproteobacteria	Enterobacterales	1256992	Pseudomonadota	Providencia	Providencia alcalifaciens	Gram-		2565764226	2565764227	2565764228	2565764225						2565767389| 2565766092				2565763746	2565763745				2565766015	2565766095	2565766094
Providencia alcalifaciens PAL-3	2563367186	Morganellaceae	Gammaproteobacteria	Enterobacterales	1256993	Pseudomonadota	Providencia	Providencia alcalifaciens	Gram-											2565770411| 2565769280| 2565768684| 2565770452
Klebsiella oxytoca OK-1	2563367187	Enterobacteriaceae	Gammaproteobacteria	Enterobacterales	1256995	Pseudomonadota	Klebsiella	Klebsiella oxytoca	Gram-							2565773902				2565775339
Klebsiella oxytoca KA-2	2563367188	Enterobacteriaceae	Gammaproteobacteria	Enterobacterales	1256996	Pseudomonadota	Klebsiella	Klebsiella oxytoca	Gram-		2565782392	2565782391	2565782390	2565782393		2565781006	2565779844|2565779310	2565779845|2565779311|2565779309	2565779846|2565779308	2565776953				2565778883	2565778884	2565777930	2565777931			2565776956	2565776955				2565778745	2565778746
Coprococcus sp. ART55/1	2565956545	Lachnospiraceae	Clostridia	Lachnospirales	751585	Bacillota	Coprococcus	Coprococcus sp. ART55/1	Gram+
Eubacterium siraeum V10Sc8a	2565956546	Oscillospiraceae	Clostridia	Eubacteriales	717961	Bacillota	unclassified	[Eubacterium] siraeum	Gram+
Escherichia coli 908541	2565956600	Enterobacteriaceae	Gammaproteobacteria	Enterobacterales	1268996	Pseudomonadota	Escherichia	Escherichia coli	Gram-		2566321498	2566321499	2566321500	2566321497		2566322203	2566318612|2566322679	2566318613|2566322680|2566322678	2566318614|2566322681	2566319415| 2566318469| 2566321099				2566320464	2566320465	2566321106	2566321105			2566318472	2566318471				2566320426	2566320425
Escherichia coli 908555	2565956601	Enterobacteriaceae	Gammaproteobacteria	Enterobacterales	1268997	Pseudomonadota	Escherichia	Escherichia coli	Gram-		2566327094	2566327095	2566327096			2566328609	2566325475|2566324935	2566325474|2566324936|2566324934	2566325473|2566324937	2566324569| 2566325077| 2566327530				2566324037	2566324038	2566327538	2566327537		2566325446	2566325074	2566325075				2566324453	2566324452
Escherichia coli 908573	2565956602	Enterobacteriaceae	Gammaproteobacteria	Enterobacterales	1268998	Pseudomonadota	Escherichia	Escherichia coli	Gram-							2566329444				2566329201| 2566329678| 2566329555
Escherichia coli 908585	2565956603	Enterobacteriaceae	Gammaproteobacteria	Enterobacterales	1268999	Pseudomonadota	Escherichia	Escherichia coli	Gram-		2566338840	2566338841	2566338842	2566338839		2566337985	2566334579|2566337686	2566334578|2566337685|2566337687	2566334577|2566337684	2566338297| 2566335227| 2566335513| 2566336734				2566335533	2566335534	2566336726	2566336727			2566335230	2566335229				2566338195	2566338194
Escherichia coli 908616	2565956604	Enterobacteriaceae	Gammaproteobacteria	Enterobacterales	1269000	Pseudomonadota	Escherichia	Escherichia coli	Gram-		2566344869	2566344868	2566344867	2566344870		2566342871	2566339854|2566342604	2566339853|2566342605|2566342603	2566339852|2566342606	2566343725| 2566340312| 2566341522| 2566341169				2566342212	2566342213	2566341160	2566341161			2566340315	2566340314				2566343826	2566343827
Escherichia coli 908624	2565956605	Enterobacteriaceae	Gammaproteobacteria	Enterobacterales	1269001	Pseudomonadota	Escherichia	Escherichia coli	Gram-							2566348826				2566345840| 2566349207| 2566346888
Escherichia coli 908632	2565956606	Enterobacteriaceae	Gammaproteobacteria	Enterobacterales	1269002	Pseudomonadota	Escherichia	Escherichia coli	Gram-		2566353629	2566353630	2566353631	2566353628		2566351459	2566352173|2566352467	2566352172|2566352466|2566352468	2566352171|2566352465	2566352828| 2566354930| 2566354314				2566353957	2566353958	2566354307	2566354308			2566354927	2566354928				2566353308	2566353307
Escherichia coli 908658	2565956607	Enterobacteriaceae	Gammaproteobacteria	Enterobacterales	1269003	Pseudomonadota	Escherichia	Escherichia coli	Gram-							2566356967				2566361170 2566357146| 2566359860| 2566358514
Escherichia coli 908675	2565956608	Enterobacteriaceae	Gammaproteobacteria	Enterobacterales	1269004	Pseudomonadota	Escherichia	Escherichia coli	Gram-		2566366079	2566366080	2566366081	2566366078		2566362976	2566363359|2566363977	2566363358|2566363978|2566363976	2566363357|2566363979	2566366813| 2566364801| 2566366230				2566361966	2566361965	2566366238	2566366237			2566366816	2566366815				2566365709	2566365710
Escherichia coli 908691	2565956609	Enterobacteriaceae	Gammaproteobacteria	Enterobacterales	1269005	Pseudomonadota	Escherichia	Escherichia coli	Gram-							2566370162				2566367893| 2566372419| 2566371595
Escherichia coli 908524	2565956610	Enterobacteriaceae	Gammaproteobacteria	Enterobacterales	1268994	Pseudomonadota	Escherichia	Escherichia coli	Gram-		2566377161	2566377160	2566377159	2566377162		2566375157	2566375185|2566376983	2566375184|2566376984|2566376982	2566375183|2566376981	2566377521| 2566374012| 2566376509				2566374546	2566374545	2566376517	2566376516			2566377518	2566377519				2566373026	2566373025
Escherichia coli 908525	2565956611	Enterobacteriaceae	Gammaproteobacteria	Enterobacterales	1268995	Pseudomonadota	Escherichia	Escherichia coli	Gram-							2566381361				2566381647| 2566378955| 2566381174| 2566381791									2566379933
Escherichia coli 910096-2	2565956612	Enterobacteriaceae	Gammaproteobacteria	Enterobacterales	1269010	Pseudomonadota	Escherichia	Escherichia coli	Gram-		2566386312	2566386313	2566386314	2566386311		2566384895	2566385110|2566388171	2566385111|2566388172|2566388170	2566385112|2566388173	2566384380| 2566386006| 2566386136				2566385983	2566385982	2566386143	2566386142			2566384383	2566384382				2566387981	2566387980
Escherichia coli 110957	2565956613	Enterobacteriaceae	Gammaproteobacteria	Enterobacterales	1268975	Pseudomonadota	Escherichia	Escherichia coli	Gram-							2566394189				2566391610| 2566390603| 2566388907| 2566393225
Escherichia coli 113290	2565956614	Enterobacteriaceae	Gammaproteobacteria	Enterobacterales	1268976	Pseudomonadota	Escherichia	Escherichia coli	Gram-							2566395511				2566394788| 2566395210| 2566398875
Escherichia coli 113302	2565956615	Enterobacteriaceae	Gammaproteobacteria	Enterobacterales	1268977	Pseudomonadota	Escherichia	Escherichia coli	Gram-							2566403686				2566400334| 2566400299| 2566401029| 2566401564
Escherichia coli 113303	2565956616	Enterobacteriaceae	Gammaproteobacteria	Enterobacterales	1268978	Pseudomonadota	Escherichia	Escherichia coli	Gram-		2566408566	2566408565	2566408564	2566408567		2566408577	2566406463|2566407676	2566406464|2566407677|2566407675	2566406465|2566407678	2566407067| 2566405923| 2566408022				2566409294	2566409295	2566408029	2566408028			2566405920	2566405921				2566406966	2566406965
Escherichia coli 907357	2565956617	Enterobacteriaceae	Gammaproteobacteria	Enterobacterales	1268979	Pseudomonadota	Escherichia	Escherichia coli	Gram-							2566415520				2566411023| 2566412593| 2566414575
Escherichia coli 907391	2565956618	Enterobacteriaceae	Gammaproteobacteria	Enterobacterales	1268980	Pseudomonadota	Escherichia	Escherichia coli	Gram-		2566418079	2566418080	2566418081	2566418078		2566416484	2566416667|2566420901	2566416668|2566420900|2566420902	2566416669|2566420899	2566420300| 2566419360				2566417682	2566417683	2566419352	2566419353			2566420297	2566420298				2566419065	2566419066
Escherichia coli 907446	2565956619	Enterobacteriaceae	Gammaproteobacteria	Enterobacterales	1268981	Pseudomonadota	Escherichia	Escherichia coli	Gram-							2566424808				2566425354| 2566422653									2566425643
Escherichia coli 907672	2565956620	Enterobacteriaceae	Gammaproteobacteria	Enterobacterales	1268982	Pseudomonadota	Escherichia	Escherichia coli	Gram-							2566426782				2566431516| 2566430780| 2566427295| 2566430921
Escherichia coli 907700	2565956621	Enterobacteriaceae	Gammaproteobacteria	Enterobacterales	1268983	Pseudomonadota	Escherichia	Escherichia coli	Gram-		2566435679	2566435678	2566435676	2566435677|2566435680		2566432571	2566434716|2566435172	2566434715|2566435171|2566435173	2566434714|2566435174	2566436730| 2566432653| 2566433800				2566434659	2566434658	2566433808	2566433807		2566436109	2566436727	2566436728				2566432440	2566432439
Escherichia coli 907701	2565956622	Enterobacteriaceae	Gammaproteobacteria	Enterobacterales	1268984	Pseudomonadota	Escherichia	Escherichia coli	Gram-							2566441819				2566442229| 2566440591
Escherichia coli 907710	2565956623	Enterobacteriaceae	Gammaproteobacteria	Enterobacterales	1268985	Pseudomonadota	Escherichia	Escherichia coli	Gram-		2566446413	2566446412	2566446411	2566446414		2566446639	2566443568|2566443218	2566443567|2566443217|2566443219	2566443566|2566443216	2566445399| 2566444111| 2566444463				2566444194	2566444195	2566444470	2566444469		2566447446	2566444114	2566444113				2566445285	2566445284
Escherichia coli 907713	2565956624	Enterobacteriaceae	Gammaproteobacteria	Enterobacterales	1268986	Pseudomonadota	Escherichia	Escherichia coli	Gram-							2566447733				2566452822| 2566448157| 2566450042| 2566448956
Escherichia coli 907715	2565956625	Enterobacteriaceae	Gammaproteobacteria	Enterobacterales	1268987	Pseudomonadota	Escherichia	Escherichia coli	Gram-							2566453952				2566458321| 2566457323| 2566458383| 2566455780
Escherichia coli 907779	2565956626	Enterobacteriaceae	Gammaproteobacteria	Enterobacterales	1268988	Pseudomonadota	Escherichia	Escherichia coli	Gram-							2566459918				2566460453| 2566464161| 2566460284									2566463486
Escherichia coli 907889	2565956627	Enterobacteriaceae	Gammaproteobacteria	Enterobacterales	1268989	Pseudomonadota	Escherichia	Escherichia coli	Gram-		2566468887	2566468888	2566468889	2566468886		2566470256	2566469528|2566467881	2566469529|2566467882|2566467880	2566469530|2566467883	2566465740| 2566464724| 2566466631| 2566469392				2566470406	2566470405	2566469383	2566469384			2566464727	2566464726				2566467327	2566467328
Escherichia coli 907892	2565956628	Enterobacteriaceae	Gammaproteobacteria	Enterobacterales	1268990	Pseudomonadota	Escherichia	Escherichia coli	Gram-		2566472410	2566472409	2566472408	2566472411		2566470984	2566473355|2566475294	2566473356|2566475293|2566475295	2566473357|2566475292	2566470780| 2566473258				2566471414	2566471413	2566473266	2566473265		2566475575	2566470777	2566470778				2566473914	2566473915
Escherichia coli 908519	2565956629	Enterobacteriaceae	Gammaproteobacteria	Enterobacterales	1268991	Pseudomonadota	Escherichia	Escherichia coli	Gram-							2566479054				2566476801| 2566480851									2566477868
Escherichia coli 908521	2565956630	Enterobacteriaceae	Gammaproteobacteria	Enterobacterales	1268992	Pseudomonadota	Escherichia	Escherichia coli	Gram-		2566486216	2566486215	2566486214	2566486217		2566482090	2566485118|2566483158	2566485117|2566483157|2566483159	2566485116|2566483160	2566486972| 2566482224| 2566486081| 2566482804				2566483576	2566483577	2566482812	2566482811			2566482227	2566482226				2566485667	2566485666
Escherichia coli 908522	2565956631	Enterobacteriaceae	Gammaproteobacteria	Enterobacterales	1268993	Pseudomonadota	Escherichia	Escherichia coli	Gram-							2566488945				2566491506| 2566487487| 2566490431
Klebsiella pneumoniae 909957	2565956632	Enterobacteriaceae	Gammaproteobacteria	Enterobacterales	1269006	Pseudomonadota	Klebsiella	Klebsiella pneumoniae	Gram-							2566498487				2566498665| 2566497180| 2566493323
Escherichia coli 909945-2	2565956633	Enterobacteriaceae	Gammaproteobacteria	Enterobacterales	1269007	Pseudomonadota	Escherichia	Escherichia coli	Gram-		2566503344	2566503343	2566503342	2566503345		2566499742	2566502307|2566502012	2566502308|2566502011|2566502013	2566502309|2566502014	2566504015| 2566502374| 2566503721				2566503423	2566503422	2566503713	2566503714		2566500633	2566502377	2566502376				2566503913	2566503912
Escherichia coli A25922R	2565956634	Enterobacteriaceae	Gammaproteobacteria	Enterobacterales	1269008	Pseudomonadota	Escherichia	Escherichia coli	Gram-		2566506047	2566506046	2566506045	2566506048		2566508927	2566506231|2566507176	2566506232|2566507177|2566507175	2566506233|2566507174	2566505390| 2566505499				2566504694	2566504693	2566505491	2566505492			2566505387	2566505388				2566507731	2566507730
Escherichia coli A35218R	2565956635	Enterobacteriaceae	Gammaproteobacteria	Enterobacterales	1269009	Pseudomonadota	Escherichia	Escherichia coli	Gram-		2566514513	2566514512	2566514511	2566514514		2566510665	2566510408|2566513680	2566510409|2566513679|2566513681	2566510410|2566513682	2566512973| 2566512394				2566512077	2566512076	2566512386	2566512387			2566512970	2566512971				2566510174	2566510175
Fusobacterium nucleatum CTI-6	2565956768	Fusobacteriaceae	Fusobacteriia	Fusobacteriales	1316587	Fusobacteriota	Fusobacterium	Fusobacterium nucleatum																					2567018353
Fusobacterium nucleatum CTI-7	2565956769	Fusobacteriaceae	Fusobacteriia	Fusobacteriales	1316588	Fusobacteriota	Fusobacterium	Fusobacterium nucleatum
Fusobacterium nucleatum CTI-5	2565956770	Fusobacteriaceae	Fusobacteriia	Fusobacteriales	1316586	Fusobacteriota	Fusobacterium	Fusobacterium nucleatum																					2567021952
Mitsuokella sp. oral taxon 131 W9106	2565956823	Selenomonadaceae	Negativicutes	Selenomonadales	1321781	Bacillota	Mitsuokella	Mitsuokella sp. oral taxon 131
Oribacterium sp. oral taxon 078 F0263	2565956824	Lachnospiraceae	Clostridia	Lachnospirales	1321782	Bacillota	Oribacterium	Oribacterium sp. oral taxon 078	Gram+											2567265378| 2567265850
Enterococcus faecalis 918	2576861524	Enterococcaceae	Bacilli	Lactobacillales	1338519	Bacillota	Enterococcus	Enterococcus faecalis	Gram+						2578659914	2578659926
Porphyromonas sp. 31_2	2588253729	Porphyromonadaceae	Bacteroidia	Bacteroidales	658663	Bacteroidota	Porphyromonas	Porphyromonas sp. 31_2	Gram-
Porphyromonas sp. KLE 1280	2588253792	Porphyromonadaceae	Bacteroidia	Bacteroidales	997829	Bacteroidota	Porphyromonas	Porphyromonas sp. KLE 1280	Gram-
Mageeibacillus indolicus 0009-5 S7-24-11	2588253851	Oscillospiraceae	Clostridia	Eubacteriales	1284702	Bacillota	Mageeibacillus	Mageeibacillus indolicus	Gram+
Prevotella loescheii 8B	2588253915	Prevotellaceae	Bacteroidia	Bacteroidales	1122985	Bacteroidota	Hoylesella	Hoylesella loescheii	Gram-
Flavonifractor plautii 1_3_50AFAA	2597489878	Oscillospiraceae	Clostridia	Eubacteriales	742738	Bacillota	Flavonifractor	Flavonifractor plautii	Gram+
Collinsella sp. 4_8_47FAA	2597489879	Coriobacteriaceae	Coriobacteriia	Coriobacteriales	742722	Actinomycetota	Collinsella	Collinsella sp. 4_8_47FAA	Gram+		2597831727	2597831728|2597831729	2597831730	2597831728|2597831729		2597833174| 2597831898
Ruminococcus callidus ATCC 27760	2597490297	Oscillospiraceae	Clostridia	Eubacteriales	411473	Bacillota	Ruminococcus	Ruminococcus callidus	Gram+
Lachnoclostridium symbiosum ATCC 14940	2597490298	Lachnospiraceae	Clostridia	Lachnospirales	411472	Bacillota	Otoolea	[Clostridium] symbiosum	Gram+		2598980605	2598980606	2598980607				2598982969	2598982970	2598982971	2598980284| 2598980650 2598982077| 2598981346| 2598982073
Clostridium sp. ATCC BAA-442	2597490299	Clostridiaceae	Clostridia	Eubacteriales	649724	Bacillota	Clostridium	Clostridium sp. ATCC BAA-442	Gram+		2598984713	2598984714	2598984715
Eubacterium ramulus VPI C6-27, ATCC 29099	2597490300	Eubacteriaceae	Clostridia	Eubacteriales	1256908	Bacillota	Eubacterium	Eubacterium ramulus	Gram+
Levilactobacillus brevis ATCC 14869	2597490301	Lactobacillaceae	Bacilli	Lactobacillales	649758	Bacillota	Levilactobacillus	Levilactobacillus brevis	Gram+						2598993845	2598992721	2598992618	2598992615|2598992617	2598992616	2598992729																	2598994105	2598994106
Prevotella disiens VPI 8057	2600254990	Prevotellaceae	Bacteroidia	Bacteroidales	1235811	Bacteroidota	Prevotella	Prevotella disiens	Gram-							2600546352
Leptotrichia wadei F0279	2600254991	Leptotrichiaceae	Fusobacteriia	Fusobacteriales	888055	Fusobacteriota	Leptotrichia	Leptotrichia wadei	Gram-
Clostridium sp. VPI C48-50	2600254992	Clostridiaceae	Clostridia	Eubacteriales	1507	Bacillota	Clostridium	Clostridium sp. ATCC 29733	Gram+		2600550810	2600550809	2600550808
Prevotella baroniae F0067	2600254993	Prevotellaceae	Bacteroidia	Bacteroidales	1115809	Bacteroidota	Segatella	Segatella baroniae	Gram-
Prevotella salivae F0493	2600254994	Prevotellaceae	Bacteroidia	Bacteroidales	1395125	Bacteroidota	Segatella	Segatella salivae	Gram-							2600556929
Prevotella sp. F0091	2600254995	Prevotellaceae	Bacteroidia	Bacteroidales	1227276	Bacteroidota	Prevotella	Prevotella sp. F0091	Gram-
Treponema lecithinolyticum ATCC 700332	2600254996	Treponemataceae	Spirochaetia	Spirochaetales	1321815	Spirochaetota	Treponema	Treponema lecithinolyticum	Gram-
Haemophilus parainfluenzae HK409	2600255006	Pasteurellaceae	Gammaproteobacteria	Pasteurellales	888828	Pseudomonadota	Haemophilus	Haemophilus parainfluenzae	Gram-																				2600587889
Prevotella pleuritidis F0068	2600255008	Prevotellaceae	Bacteroidia	Bacteroidales	1081904	Bacteroidota	Hoylesella	Hoylesella pleuritidis	Gram-
Treponema socranskii socranskii VPI DR56BR1116, ATCC 35536	2600255009	Treponemataceae	Spirochaetia	Spirochaetales	1125725	Spirochaetota	Treponema	Treponema socranskii	Gram-											2600595785
Oscillibacter sp. KLE 1728	2600255040	Oscillospiraceae	Clostridia	Eubacteriales	1226322	Bacillota	Oscillibacter	Oscillibacter sp. KLE 1728	Gram+		2600699417	2600699418	2600699419				2600699414	2600699413|2600700258	2600699412
Oscillibacter sp. KLE 1745	2600255041	Oscillospiraceae	Clostridia	Eubacteriales	1226323	Bacillota	Oscillibacter	Oscillibacter sp. KLE 1745	Gram+
Clostridium sp. KLE 1755	2600255042	Clostridiaceae	Clostridia	Eubacteriales	1226325	Bacillota	Clostridium	Clostridium sp. KLE 1755	Gram+		2600707377	2600707378	2600707379
Capnocytophaga sp. oral taxon 863 F0517	2600255043	Flavobacteriaceae	Flavobacteriia	Flavobacteriales	1227266	Bacteroidota	Capnocytophaga	Capnocytophaga sp. oral taxon 863	Gram-
Leptotrichia sp. oral taxon 879 F0557	2600255044	Leptotrichiaceae	Fusobacteriia	Fusobacteriales	1227268	Fusobacteriota	Leptotrichia	Leptotrichia sp. oral taxon 879	Gram-		2600974799	2600974798	2600974797
Porphyromonas gingivalis F0568	2600255045	Porphyromonadaceae	Bacteroidia	Bacteroidales	1227269	Bacteroidota	Porphyromonas	Porphyromonas gingivalis	Gram-
Porphyromonas gingivalis F0569	2600255046	Porphyromonadaceae	Bacteroidia	Bacteroidales	1227270	Bacteroidota	Porphyromonas	Porphyromonas gingivalis	Gram-
Porphyromonas gingivalis F0570	2600255047	Porphyromonadaceae	Bacteroidia	Bacteroidales	1227271	Bacteroidota	Porphyromonas	Porphyromonas gingivalis	Gram-
Porphyromonas sp. oral taxon 278 W7784	2600255048	Porphyromonadaceae	Bacteroidia	Bacteroidales	1227272	Bacteroidota	Porphyromonas	Porphyromonas sp. oral taxon 278	Gram-
Streptococcus sobrinus W1703	2600255049	Streptococcaceae	Bacilli	Lactobacillales	1227275	Bacillota	Streptococcus	Streptococcus sobrinus	Gram+						2600726193		2600726354	2600726351|2600726353	2600726352
Clostridiales Family XIII. Incertae Sedis sp. S5-A14a	2600255102	Anaerovoracaceae	Clostridia	Peptostreptococcales	1230734	Bacillota	unclassified	Clostridiales bacterium S5-A14a	Gram+											2600965616
Clostridiales Family XI. Incertae Sedis sp. S5-A11	2600255103	unclassified	Tissierellia	unclassified	1230730	Bacillota	unclassified	Tissierellia bacterium S5-A11	Gram+						2600967101
Actinomyces urogenitalis S6-C4	2600255104	Actinomycetaceae	Actinomycetes	Actinomycetales	1284679	Actinomycetota	Actinomyces	Actinomyces urogenitalis	Gram+						2600971654 2600971767
Anaerococcus lactolyticus S7-1-13	2600255105	Peptoniphilaceae	Tissierellia	Tissierellales	1284686	Bacillota	Anaerococcus	Anaerococcus lactolyticus	Gram+
Clostridiales Family XI. Incertae Sedis sp. S7-1-4	2600255106	unclassified	Tissierellia	unclassified	1284708	Bacillota	unclassified	Tissierellia bacterium S7-1-4	Gram+
Actinomyces sp. S6-Spd3	2600255107	Actinomycetaceae	Actinomycetes	Actinomycetales	1284680	Actinomycetota	Actinomyces	Actinomyces sp. S6-Spd3	Gram+						2600977460
Actinomyces sp. S4-C9	2600255108	Actinomycetaceae	Actinomycetes	Actinomycetales	1219581	Actinomycetota	Actinomyces	Actinomyces sp. S4-C9	Gram+											2600977785| 2600978419									2600978670
Arcanobacterium sp. S3PF19	2600255109	Actinomycetaceae	Actinomycetes	Actinomycetales	1219585	Actinomycetota	Arcanobacterium	Arcanobacterium sp. S3PF19	Gram+							2600980623
Peptostreptococcus sp. MV1	2600255110	Peptostreptococcaceae	Clostridia	Peptostreptococcales	1219626	Bacillota	Peptostreptococcus	Peptostreptococcus sp. MV1	Gram+
Prevotella sp. S7-1-8	2600255111	Prevotellaceae	Bacteroidia	Bacteroidales	1284775	Bacteroidota	Prevotella	Prevotella sp. S7-1-8	Gram-
Corynebacterium freneyi DNF00450	2600255117	Corynebacteriaceae	Actinomycetes	Mycobacteriales	1287475	Actinomycetota	Corynebacterium	Corynebacterium freneyi	Gram+											2601007317| 2601007318| 2601009249| 2601008908															2601007451	2601007455
Prevotella bivia DNF00188	2600255118	Prevotellaceae	Bacteroidia	Bacteroidales	1287476	Bacteroidota	Prevotella	Prevotella bivia								2601011359
Lancefieldella parvula DNF00906	2600255119	Atopobiaceae	Coriobacteriia	Coriobacteriales	1287474	Actinomycetota	Lancefieldella	Lancefieldella parvula	Gram+							2601013059
Clostridiales bacterium oral taxon 876 F0540	2600255234	unclassified	Clostridia	Eubacteriales	1321778	Bacillota	unclassified	Clostridiales bacterium oral taxon 876	Gram+						2601466925| 2601470277| 2601467463
Gemella bergeri ATCC 700627	2600255235	Gemellaceae	Bacilli	Bacillales	1321820	Bacillota	Gemella	Gemella bergeri	Gram+																												2601472001	2601472002
Peptostreptococcaceae bacterium oral taxon 113 W5053	2600255236	Peptostreptococcaceae	Clostridia	Peptostreptococcales	1321784	Bacillota	unclassified	Peptostreptococcaceae bacterium oral taxon 113	Gram+
Leptotrichia sp. oral taxon 215 W9775	2600255237	Leptotrichiaceae	Fusobacteriia	Fusobacteriales	1321779	Fusobacteriota	Leptotrichia	Leptotrichia sp. oral taxon 215																								2601475477	2601475478	2601475476
Porphyromonas gingivalis F0185	2600255238	Porphyromonadaceae	Bacteroidia	Bacteroidales	1321821	Bacteroidota	Porphyromonas	Porphyromonas gingivalis
Selenomonas sp. oral taxon 892 F0426	2600255239	Selenomonadaceae	Negativicutes	Selenomonadales	1321786	Bacillota	Selenomonas	Selenomonas sp. oral taxon 892
Porphyromonas gingivalis F0566	2600255240	Porphyromonadaceae	Bacteroidia	Bacteroidales	1321822	Bacteroidota	Porphyromonas	Porphyromonas gingivalis
Porphyromonas gingivalis W4087	2600255241	Porphyromonadaceae	Bacteroidia	Bacteroidales	1321823	Bacteroidota	Porphyromonas	Porphyromonas gingivalis
Clostridium bolteae WAL-14578 JGI Assembly and Annotation	2602042044	Lachnospiraceae	Clostridia	Clostridiales	742732	Bacillota	Lachnoclostridium	[Clostridium] bolteae												2603625383
Eggerthella lenta 1_1_60AFAA	2619619289	Eggerthellaceae	Coriobacteriia	Eggerthellales	742768	Actinomycetota	Eggerthella	Eggerthella lenta	Gram+											2621258275
Parabacteroides sp. HGS0025	2619619295	Tannerellaceae	Bacteroidia	Bacteroidales	1078087	Bacteroidota	Parabacteroides	Parabacteroides sp. HGS0025	Gram-		2621281221	2621281220	2621281219				2621281248	2621281247	2621281246
Parabacteroides goldsteinii WAL 12034	2619619296	Tannerellaceae	Bacteroidia	Bacteroidales	927665	Bacteroidota	Parabacteroides	Parabacteroides goldsteinii	Gram-		2621288095	2621288096	2621288097				2621288074	2621288075	2621288076
Parabacteroides gordonii MS-1	2619619297	Tannerellaceae	Bacteroidia	Bacteroidales	1203610	Bacteroidota	Parabacteroides	Parabacteroides gordonii	Gram-		2621288808	2621288807	2621288806				2621288835	2621288834	2621288833
Clostridiales bacterium SM4/1	2622736406	unclassified	Clostridia	Eubacteriales	245012	Bacillota	unclassified	butyrate-producing bacterium SM4/1	Gram+											2622766448
Candidatus Mycoplasma girerdii VCU_M1	2630968516	Mycoplasmoidaceae	unclassified	Mycoplasmoidales	1318617	Mycoplasmatota	Malacoplasma	Candidatus Malacoplasma girerdii
Neisseria sp. HMSC06F02	2630968979	Neisseriaceae	Betaproteobacteria	Neisseriales	1581124	Pseudomonadota	Neisseria	Neisseria sp. HMSC06F02												2634013371
Bacteroides sp. 3_1_13	2634166432	Bacteroidaceae	Bacteroidia	Bacteroidales	457389	Bacteroidota	Bacteroides	Bacteroides sp. 3_1_13	Gram-
Klebsiella oxytoca 09-7231	2636415460	Enterobacteriaceae	Gammaproteobacteria	Enterobacterales	883116	Pseudomonadota	Klebsiella	Klebsiella oxytoca	Gram-		2636666462	2636666463	2636666464			2636668484	2636667201|2636664460	2636667202|2636664459|2636664461	2636667203|2636664458	2636666607				2636668055	2636668056	2636669308	2636669307			2636666610	2636666609				2636664710	2636664709
Parabacteroides sp. D26	2636415718	Tannerellaceae	Bacteroidia	Bacteroidales	658662	Bacteroidota	Parabacteroides	Parabacteroides sp. D26	Gram-
Klebsiella oxytoca 10-5249	2636415732	Enterobacteriaceae	Gammaproteobacteria	Enterobacterales	883124	Pseudomonadota	Klebsiella	Klebsiella oxytoca	Gram-		2637784296	2637784297	2637784298			2637782563	2637781249|2637780730	2637781250|2637780729|2637780731	2637781251|2637780732	2637784440				2637782133	2637782134	2637783420	2637783419			2637784443	2637784442				2637780500	2637780501
Enterocloster citroniae WAL-19142	2636415767	Lachnospiraceae	Clostridia	Lachnospirales	742734	Bacillota	Enterocloster	Enterocloster citroniae	Gram+		2637934493	2637934494	2637934495							2637933500| 2637934258
Coprobacillus sp. 8_1_38FAA	2636415786	Coprobacillaceae	Erysipelotrichia	Erysipelotrichales	450746	Bacillota	Coprobacillus	Coprobacillus sp. 8_1_38FAA	Gram+
Capnocytophaga sp. oral taxon 329 F0087	2636416129	Flavobacteriaceae	Flavobacteriia	Flavobacteriales	706436	Bacteroidota	Capnocytophaga	Capnocytophaga sp. oral taxon 329	Gram-																												2639446328	2639446327
Dorea sp. D27	2639762926	Lachnospiraceae	Clostridia	Lachnospirales	658665	Bacillota	Dorea	Dorea sp. D27	Gram+		2641293334	2641293333	2641293332							2641294317| 2641295741
Klebsiella oxytoca 10-5244	2639763041	Enterobacteriaceae	Gammaproteobacteria	Enterobacterales	883119	Pseudomonadota	Klebsiella	Klebsiella oxytoca	Gram-		2641745370	2641745371	2641745372			2641747032	2641748389|2641748921	2641748388|2641748920|2641748922	2641748387|2641748919	2641745513| 2641750883| 2641750548				2641747463	2641747462	2641746173	2641746174		2641750436	2641745516	2641745515				2641749147	2641749146
Bacteroides eggerthii 1_2_48FAA	2648501716	Bacteroidaceae	Bacteroidia	Bacteroidales	665953	Bacteroidota	Bacteroides	Bacteroides eggerthii	Gram-		2650975413	2650975414	2650975415
Enterocloster clostridioformis WAL-7855	2648501893	Lachnospiraceae	Clostridia	Lachnospirales	742736	Bacillota	Enterocloster	Enterocloster clostridioformis	Gram+											2651718677| 2651715174
Clostridium sp. 1_1_41A1FAA	2651869832	Clostridiaceae	Clostridia	Eubacteriales	457397	Bacillota	Clostridium	Clostridium sp. 1_1_41A1FAA	Gram+											2653033245
Fusobacterium nucleatum animalis F0419	2654587559	Fusobacteriaceae	Fusobacteriia	Fusobacteriales	999414	Fusobacteriota	Fusobacterium	Fusobacterium animalis	Gram-
Fusobacterium nucleatum animalis 7_1	2654587776	Fusobacteriaceae	Fusobacteriia	Fusobacteriales	457405	Fusobacteriota	Fusobacterium	Fusobacterium animalis	Gram-
Eubacterium sp. 3_1_31	2654587777	Eubacteriaceae	Clostridia	Eubacteriales	457402	Bacillota	Eubacterium	Eubacterium sp. 3_1_31	Gram+
Pseudomonas sp. HMSC05H02	2654587793	Pseudomonadaceae	Gammaproteobacteria	Pseudomonadales	1581118	Pseudomonadota	Pseudomonas	Pseudomonas sp. HMSC05H02								2655794042				2655794614| 2655793405| 2655795767
Bifidobacterium bifidum NCIMB 41171	2654587845	Bifidobacteriaceae	Actinomycetes	Bifidobacteriales	398513	Actinomycetota	Bifidobacterium	Bifidobacterium bifidum	Gram+							2655987724
Scardovia wiggsiae F0424	2654587871	Bifidobacteriaceae	Actinomycetes	Bifidobacteriales	857290	Actinomycetota	Scardovia	Scardovia wiggsiae	Gram+							2656094766
Fusobacterium nucleatum animalis 21_1A	2663762974	Fusobacteriaceae	Fusobacteriia	Fusobacteriales	469601	Fusobacteriota	Fusobacterium	Fusobacterium animalis	Gram-																												2665150119	2665150118
Clostridiales bacterium KA00134	2675903258	unclassified	Clostridia	Eubacteriales	1588750	Bacillota	unclassified	Clostridiales bacterium KA00134	Gram+
Veillonella atypica CMW7756B	2675903428	Veillonellaceae	Negativicutes	Veillonellales	39777	Bacillota	Veillonella	Veillonella atypica
Sutterella sp. KLE1602	2675903629	Sutterellaceae	Betaproteobacteria	Burkholderiales	1574262	Pseudomonadota	Sutterella	Sutterella sp. KLE1602
Aerococcus christensenii KA00635	2681813063	Aerococcaceae	Bacilli	Lactobacillales	87541	Bacillota	Aerococcus	Aerococcus christensenii	Gram+
Fusobacterium equinum CMW8396	2681813064	Fusobacteriaceae	Fusobacteriia	Fusobacteriales	134605	Fusobacteriota	Fusobacterium	Fusobacterium equinum
Fusobacterium nucleatum MJR7757B	2681813065	Fusobacteriaceae	Fusobacteriia	Fusobacteriales	851	Fusobacteriota	Fusobacterium	Fusobacterium nucleatum
Prevotella corporis MJR7716	2681813066	Prevotellaceae	Bacteroidia	Bacteroidales	28128	Bacteroidota	Prevotella	Prevotella corporis								2682739753
Clostridiales bacterium KA00581	2775506793	unclassified	Tissierellia	unclassified	1588751	Bacillota	unclassified	Tissierellia bacterium KA00581	Gram+											2775885467| 2775886721
Coriobacteriales bacterium DNF00809	2775506811	unclassified	Coriobacteriia	Coriobacteriales	1588753	Actinomycetota	unclassified	Coriobacteriales bacterium DNF00809	Gram+
Megasphaera hutchinsoni KA00182	2775506827	Veillonellaceae	Negativicutes	Veillonellales	1588748	Bacillota	Megasphaera	Megasphaera hutchinsoni
Veillonellaceae bacterium DNF00626	2775506828	Veillonellaceae	Negativicutes	Veillonellales	1588754	Bacillota	unclassified	Veillonellaceae bacterium DNF00626																					2775976490
Porphyromonadaceae bacterium KA00676	2775506830	Porphyromonadaceae	Bacteroidia	Bacteroidales	1588749	Bacteroidota	unclassified	Porphyromonadaceae bacterium KA00676
Akkermansia sp. KLE1798	2775506868	Akkermansiaceae	Verrucomicrobiia	Verrucomicrobiales	1574265	Verrucomicrobiota	Akkermansia	Akkermansia sp. KLE1798
Akkermansia sp. KLE1797	2775506869	Akkermansiaceae	Verrucomicrobiia	Verrucomicrobiales	1574264	Verrucomicrobiota	Akkermansia	Akkermansia sp. KLE1797			2776120559	2776120560	2776120561
Akkermansia sp. KLE1605	2775506871	Akkermansiaceae	Verrucomicrobiia	Verrucomicrobiales	1131336	Verrucomicrobiota	Akkermansia	Akkermansia sp. KLE1605	Gram+
Parvimonas sp. KA00067	2775506873	Peptoniphilaceae	Tissierellia	Tissierellales	1588755	Bacillota	Parvimonas	Parvimonas sp. KA00067	Gram+											2776134120| 2776134788
Atopobium deltae DNF00019	2775506915	Atopobiaceae	Coriobacteriia	Coriobacteriales	1393034	Actinomycetota	Atopobium	Atopobium deltae	Gram+							2776327843
Megasphaera sp. MJR9396C	2775506928	Veillonellaceae	Negativicutes	Veillonellales	1603888	Bacillota	Megasphaera	Megasphaera sp. MJR8396C							2776383342
Corynebacterium sp. CMW7794	2775507051	Corynebacteriaceae	Actinomycetes	Mycobacteriales	1603887	Actinomycetota	Corynebacterium	Corynebacterium sp. CMW7794	Gram+		2776922207	2776922208	2776922209	2776922206						2776922678| 2776922261| 2776922346															2776921661	2776921663
Pseudomonas sp. HMSC08G10	2788499855	Pseudomonadaceae	Gammaproteobacteria	Pseudomonadales	1581141	Pseudomonadota	Pseudomonas	Pseudomonas sp. HMSC08G10			2788763368	2788763367	2788763366	2788763369		2788763844| 2788762078	2788765084	2788765087|2788765085	2788765086	2788764075| 2788761278| 2788761835| 2788761549										2788760717|2788761281	2788760721|2788761280
Prevotella bivia GED7760C	2806310574	Prevotellaceae	Bacteroidia	Bacteroidales	28125	Bacteroidota	Prevotella	Prevotella bivia			2806774298	2806774299	2806774300			2806773941
Prevotella bivia GED7880	2806310575	Prevotellaceae	Bacteroidia	Bacteroidales	28125	Bacteroidota	Prevotella	Prevotella bivia								2806776027
Leptotrichia wadei KA00185	2806310704	Leptotrichiaceae	Fusobacteriia	Fusobacteriales	157687	Fusobacteriota	Leptotrichia	Leptotrichia wadei																													2807290803	2807290802
Bacteroides finegoldii CL09T03C10	2806310717	Bacteroidaceae	Bacteroidia	Bacteroidales	997888	Bacteroidota	Bacteroides	Bacteroides finegoldii	Gram-
Anaerococcus hydrogenalis MJR7738A	2806310727	Peptoniphilaceae	Tissierellia	Tissierellales	33029	Bacillota	Anaerococcus	Anaerococcus hydrogenalis	Gram+
Citrobacter koseri GED7778C	2811995060	Enterobacteriaceae	Gammaproteobacteria	Enterobacterales	545	Pseudomonadota	Citrobacter	Citrobacter koseri			2812996785	2812996786	2812996787			2812997321	2813000147|2812998139|2812997762	2813000146|2812998140|2812997761|2812998138|2812997759	2813000145|2812997760|2812998137	2812996891| 2812999969				2812997340	2812997341	2812999977	2812999976			2812996894	2812996893				2812999315	2812999316
Citrobacter koseri PSS7778B	2811995061	Enterobacteriaceae	Gammaproteobacteria	Enterobacterales	545	Pseudomonadota	Citrobacter	Citrobacter koseri			2813001074	2813001073	2813001072			2813002337	2813002503|2813004754|2813004133	2813002504|2813004134|2813004132|2813004751|4753	2813002505|2813004135|2813004752	2813000968| 2813002861				2813001210	2813001209	2813002869	2813002868			2813000965	2813000966				2813003439	2813003438
Streptococcus pasteurianus GED7275A	2814123121	Streptococcaceae	Bacilli	Lactobacillales	197614	Bacillota	Streptococcus	Streptococcus pasteurianus	Gram+						2814871953
Cutibacterium avidum MJR7694	2816332324	Propionibacteriaceae	Actinomycetes	Propionibacteriales	33010	Actinomycetota	Cutibacterium	Cutibacterium avidum	Gram+		2817571750	2817571751	2817571752	2817571749	2817572916	2817571467	2817572308	2817572309	2817572310																2817573020	2817573019
Staphylococcus simulans MJR7712	2816332328	Staphylococcaceae	Bacilli	Bacillales	1286	Bacillota	Staphylococcus	Staphylococcus simulans	Gram+						2817590261| 2817590260		2817590246	2817590249|2817590247	2817590248	2817592124| 2817592300| 2817591402| 2817590500| 2817591689									2817592258	2817592121	2817592122
Alloscardovia omnicolens CMW7705A	2822736549	Bifidobacteriaceae	Actinomycetes	Bifidobacteriales	419015	Actinomycetota	Alloscardovia	Alloscardovia omnicolens	Gram+							2822736592
Staphylococcus lugdunensis MJR7738	2826935435	Staphylococcaceae	Bacilli	Bacillales	28035	Bacillota	Staphylococcus	Staphylococcus lugdunensis	Gram+		2826935563	2826935562	2826935561		2826936763		2826936745	2826936748|2826936746	2826936747	2826936567| 2826937147| 2826936866										2826936570	2826936569						2826937551	2826937550
Enterocloster bolteae WAL-14578	2833300541	Lachnospiraceae	Clostridia	Lachnospirales	742732	Bacillota	Enterocloster	Enterocloster bolteae	Gram+											2833303340| 2833306641| 2833303693
Arachnia propionica F0230a	2836836789	Propionibacteriaceae	Actinomycetes	Propionibacteriales	767029	Actinomycetota	Arachnia	Arachnia propionica	Gram+						2836838326					2836837772
Fusobacterium nucleatum vincentii 3_1_27	2847464576	Fusobacteriaceae	Fusobacteriia	Fusobacteriales	469602	Fusobacteriota	Fusobacterium	Fusobacterium vincentii	Gram-
Proteus mirabilis GED7834	2857240370	Morganellaceae	Gammaproteobacteria	Enterobacterales	584	Pseudomonadota	Proteus	Proteus mirabilis			2857243779	2857243780	2857243781				2857242505	2857242504	2857242503	2857242803| 2857242662| 2857243028				2857241100	2857241099					2857242665	2857242664
Gardnerella vaginalis GED7760B	2865449495	Bifidobacteriaceae	Actinomycetes	Bifidobacteriales	2702	Actinomycetota	Gardnerella	Gardnerella vaginalis								2865450551
Gardnerella vaginalis CMW7778B	2865450702	Bifidobacteriaceae	Actinomycetes	Bifidobacteriales	2702	Actinomycetota	Gardnerella	Gardnerella vaginalis								2865451525
Corynebacterium sp. HMSC062E11	2865451959	Corynebacteriaceae	Actinomycetes	Mycobacteriales	1739326	Actinomycetota	Corynebacterium	Corynebacterium sp. HMSC062E11												2865454415| 2865452591| 2865452009
Corynebacterium sp. HMSC078A10	2865454630	Corynebacteriaceae	Actinomycetes	Mycobacteriales	1739312	Actinomycetota	Corynebacterium	Corynebacterium sp. HMSC078A10			2865456142	2865456141	2865456140	2865456143						2865456521| 2865457052| 2865455275									2865457108	2865455689	2865455687				2865454772	2865454770
Corynebacterium sp. HMSC068H04	2865457301	Corynebacteriaceae	Actinomycetes	Mycobacteriales	1739296	Actinomycetota	Corynebacterium	Corynebacterium sp. HMSC068H04			2865459662	2865459663	2865459664	2865459661						2865457536| 2865457642															2865458782	2865458780
Corynebacterium sp. HMSC062A03	2865459908	Corynebacteriaceae	Actinomycetes	Mycobacteriales	1739285	Actinomycetota	Corynebacterium	Corynebacterium sp. HMSC062A03												2865460847| 2865462290| 2865461003									2865461147	2865461004	2865461002				2865461851	2865461849
Rothia sp. HMSC069C03	2865462411	Micrococcaceae	Actinomycetes	Micrococcales	1739283	Actinomycetota	Rothia	Rothia sp. HMSC069C03							2865462697
Corynebacterium sp. HMSC065D07	2865464240	Corynebacteriaceae	Actinomycetes	Mycobacteriales	1739264	Actinomycetota	Corynebacterium	Corynebacterium sp. HMSC065D07												2865466686| 2865466562
Brevibacterium sp. HMSC063G07	2865466799	Brevibacteriaceae	Actinomycetes	Micrococcales	1739261	Actinomycetota	Brevibacterium	Brevibacterium sp. HMSC063G07							2865466899					2865467866| 2865467448| 2865468856
Corynebacterium sp. HMSC072A02	2865620967	Corynebacteriaceae	Actinomycetes	Mycobacteriales	1715177	Actinomycetota	Corynebacterium	Corynebacterium sp. HMSC072A02			2865621490	2865621489	2865621488	2865621491						2865621103| 2865621102| 2865623512										2865622685	2865622686				2865622943	2865622945
Rothia sp. HMSC072B03	2865623611	Micrococcaceae	Actinomycetes	Micrococcales	1715109	Actinomycetota	Rothia	Rothia sp. HMSC072B03							2865625140														2865624512
Corynebacterium sp. HMSC22B11	2865625429	Corynebacteriaceae	Actinomycetes	Mycobacteriales	1581056	Actinomycetota	Corynebacterium	Corynebacterium sp. HMSC22B11												2865626386| 2865625602| 2865626350| 2865626644| 2865626642									2865627100
Corynebacterium sp. HMSC034A01	2865627506	Corynebacteriaceae	Actinomycetes	Mycobacteriales	1739295	Actinomycetota	Corynebacterium	Corynebacterium sp. HMSC034A01												2865628930| 2865629581| 2865629319									2865627890
Actinomyces sp. HMSC035G02	2865629863	Actinomycetaceae	Actinomycetes	Actinomycetales	1739406	Actinomycetota	Actinomyces	Actinomyces sp. HMSC035G02							2865629970
Rothia sp. HMSC062F03	2865631929	Micrococcaceae	Actinomycetes	Micrococcales	1715153	Actinomycetota	Rothia	Rothia sp. HMSC062F03							2865632729
Rothia sp. HMSC061D12	2865633782	Micrococcaceae	Actinomycetes	Micrococcales	1715161	Actinomycetota	Rothia	Rothia sp. HMSC061D12							2865633941
Corynebacterium sp. HMSC036D02	2865635668	Corynebacteriaceae	Actinomycetes	Mycobacteriales	1715013	Actinomycetota	Corynebacterium	Corynebacterium sp. HMSC036D02												2865637251| 2865636567| 2865636326															2865637024	2865637026
Rothia sp. HMSC061C12	2865638214	Micrococcaceae	Actinomycetes	Micrococcales	1739547	Actinomycetota	Rothia	Rothia sp. HMSC061C12							2865639149														2865638775
Corynebacterium sp. HMSC066C02	2865640064	Corynebacteriaceae	Actinomycetes	Mycobacteriales	1739500	Actinomycetota	Corynebacterium	Corynebacterium sp. HMSC066C02												2865640188| 2865641902| 2865642508										2865642509	2865642507				2865640789	2865640791
Corynebacterium sp. HMSC074C01	2865642609	Corynebacteriaceae	Actinomycetes	Mycobacteriales	1739482	Actinomycetota	Corynebacterium	Corynebacterium sp. HMSC074C01												2865642957| 2865645187| 2865645055															2865643831	2865643833
Corynebacterium sp. HMSC078C09	2865645244	Corynebacteriaceae	Actinomycetes	Mycobacteriales	1739478	Actinomycetota	Corynebacterium	Corynebacterium sp. HMSC078C09												2865646716| 2865646158| 2865647285									2865647344						2865646875	2865646873
Corynebacterium sp. HMSC072D12	2865647829	Corynebacteriaceae	Actinomycetes	Mycobacteriales	1739447	Actinomycetota	Corynebacterium	Corynebacterium sp. HMSC072D12												2865648011| 2865648298| 2865647880
Rothia sp. HMSC061E04	2865650317	Micrococcaceae	Actinomycetes	Micrococcales	1739431	Actinomycetota	Rothia	Rothia sp. HMSC061E04							2865651997
Corynebacterium sp. HMSC056E09	2865652145	Corynebacteriaceae	Actinomycetes	Mycobacteriales	1739416	Actinomycetota	Corynebacterium	Corynebacterium sp. HMSC056E09			2865653369	2865653370	2865653371	2865653368						2865652206| 2865653993									2865654639	2865653332	2865653331				2865653667	2865653669
Actinomyces sp. HMSC075C01	2865654724	Actinomycetaceae	Actinomycetes	Actinomycetales	1739387	Actinomycetota	Actinomyces	Actinomyces sp. HMSC075C01							2865655205					2865655134
Corynebacterium sp. HMSC078H07	2865657590	Corynebacteriaceae	Actinomycetes	Mycobacteriales	1739379	Actinomycetota	Corynebacterium	Corynebacterium sp. HMSC078H07												2865659080| 2865658538
Corynebacterium sp. HMSC11E11	2865660320	Corynebacteriaceae	Actinomycetes	Mycobacteriales	1581089	Actinomycetota	Corynebacterium	Corynebacterium sp. HMSC11E11	Gram+											2865661738| 2865661853| 2865661852| 2865661331															2865661402	2865661399
Arthrobacter sp. HMSC08H08	2865679532	Micrococcaceae	Actinomycetes	Micrococcales	1581143	Actinomycetota	Arthrobacter	Arthrobacter sp. HMSC08H08							2865679982					2865681319| 2865679563| 2865681262
Arthrobacter sp. HMSC06H05	2865681571	Micrococcaceae	Actinomycetes	Micrococcales	1581128	Actinomycetota	Arthrobacter	Arthrobacter sp. HMSC06H05							2865682290					2865682864| 2865682484| 2865683422
Corynebacterium sp. HMSC05H05	2865683558	Corynebacteriaceae	Actinomycetes	Mycobacteriales	1581119	Actinomycetota	Corynebacterium	Corynebacterium sp. HMSC05H05												2865684119| 2865683952
Corynebacterium sp. HMSC05D03	2865685920	Corynebacteriaceae	Actinomycetes	Mycobacteriales	1581115	Actinomycetota	Corynebacterium	Corynebacterium sp. HMSC05D03												2865687695| 2865688045
Corynebacterium sp. HMSC29G08	2865814381	Corynebacteriaceae	Actinomycetes	Mycobacteriales	1581069	Actinomycetota	Corynebacterium	Corynebacterium sp. HMSC29G08												2865816295
Corynebacterium sp. HMSC27B11	2865816792	Corynebacteriaceae	Actinomycetes	Mycobacteriales	1581065	Actinomycetota	Corynebacterium	Corynebacterium sp. HMSC27B11												2865818686| 2865818471| 2865818170| 2865818433| 2865818688										2865818685|2865818263	2865818687				2865816900	2865816898
Corynebacterium sp. HMSC04H06	2865818737	Corynebacteriaceae	Actinomycetes	Mycobacteriales	1581050	Actinomycetota	Corynebacterium	Corynebacterium sp. HMSC04H06												2865818939| 2865818824| 2865819030| 2865820228| 2865819710										2865819708	2865819711
Brevibacterium sp. HMSC07C04	2865821010	Brevibacteriaceae	Actinomycetes	Micrococcales	1581130	Actinomycetota	Brevibacterium	Brevibacterium sp. HMSC07C04							2865821505					2865823025| 2865821174| 2865821699
Corynebacterium sp. HMSC069E04	2865823338	Corynebacteriaceae	Actinomycetes	Mycobacteriales	1739400	Actinomycetota	Corynebacterium	Corynebacterium sp. HMSC069E04												2865823859| 2865824492									2865824855						2865824406	2865824404
Corynebacterium sp. HMSC074A01	2865865847	Corynebacteriaceae	Actinomycetes	Mycobacteriales	1715030	Actinomycetota	Corynebacterium	Corynebacterium sp. HMSC074A01												2865865889| 2865866573															2865867546	2865867548
Corynebacterium sp. HMSC055A01	2868002852	Corynebacteriaceae	Actinomycetes	Mycobacteriales	1715083	Actinomycetota	Corynebacterium	Corynebacterium sp. HMSC055A01												2868005563 2868004539
Corynebacterium sp. HMSC074E01	2868005651	Corynebacteriaceae	Actinomycetes	Mycobacteriales	1715017	Actinomycetota	Corynebacterium	Corynebacterium sp. HMSC074E01												2868008102| 2868007968| 2868006362
Rothia sp. HMSC065C03	2868008203	Micrococcaceae	Actinomycetes	Micrococcales	1715084	Actinomycetota	Rothia	Rothia sp. HMSC065C03							2868009544
Rothia sp. HMSC065D09	2868010103	Micrococcaceae	Actinomycetes	Micrococcales	1739511	Actinomycetota	Rothia	Rothia sp. HMSC065D09							2868010714
Rothia sp. HMSC066H02	2868012014	Micrococcaceae	Actinomycetes	Micrococcales	1739503	Actinomycetota	Rothia	Rothia sp. HMSC066H02							2868013773
Corynebacterium sp. HMSC071B10	2868013923	Corynebacteriaceae	Actinomycetes	Mycobacteriales	1739494	Actinomycetota	Corynebacterium	Corynebacterium sp. HMSC071B10												2868014211| 2868016281															2868015816	2868015814
Corynebacterium sp. HMSC059E07	2868016438	Corynebacteriaceae	Actinomycetes	Mycobacteriales	1739471	Actinomycetota	Corynebacterium	Corynebacterium sp. HMSC059E07												2868018630| 2868019026| 2868018774									2868018204
Rothia sp. HMSC072E10	2868019047	Micrococcaceae	Actinomycetes	Micrococcales	1739448	Actinomycetota	Rothia	Rothia sp. HMSC072E10

## Sheet: Table S3
	kdpFABC						bcc ABC transporter				ectABC									betAB		proABC			otsBA		opuFAB
Genome Name | Sample Name	Potassium-transporting ATPase potassium-binding subunit kdpA subunit	Potassium-transporting ATPase ATP-binding subunit kdpB subunit	Potassium-transporting ATPase KdpC subunit	Potassium-transporting ATPase KdpF subunit	kimA	kup (trkD)	ATP-binding protein	Osmoprotectant import permease protein	Osmoprotectant-binding protein	bcct	L-2,4-diaminobutyric acid acetyltransferase	Diaminobutyrate--2-oxoglutarate transaminase	L-ectoine synthase	kefB	kefG	kefC	kefF	proP/ousA	opuE/putP	Oxygen-dependent choline dehydrogenase	Betaine aldehyde dehydrogenase	Gamma-glutamyl phosphate reductase	Glutamate 5-kinase	Pyrroline-5-carboxylate reductase	Trehalose-6-phosphate synthase, otsA	Trehalose-phosphate phosphatase, otsB	Quaternary amine transport ATP-binding protein, opuFA	Osmoprotectant update ABC transporter permease/substrate-binding subunit, opuFB
Bacteroides ovatus ATCC 8483	Ga0125169_11207	Ga0125169_11206	Ga0125169_11205				Ga0125169_114627	Ga0125169_114626	Ga0125169_114625										Ga0125169_113334|Ga0125169_112870|Ga0125169_111545
Clostridium butyricum DSM 10702	Ga0486361_01_3269879_3271618	Ga0486361_01_3267796_3269862	Ga0486361_01_3267173_3267778			Ga0486361_02_746433_748451	Ga0486361_01_2935607_2936404	Ga0486361_01_2937545_2938330	Ga0486361_01_2936477_2937511										Ga0486361_01_2366510_2368024|Ga0486361_01_1780845_1782344|Ga0486361_01_534486_535985								Ga0486361_01_557165_558292	Ga0486361_01_558292_559875
Bacteroides thetaiotaomicron DSM 2079							Ga0486194_01_5739580_5740806	Ga0486194_01_5738753_5739583	Ga0486194_01_5737865_5738725										Ga0486194_01_1136323_1138200|Ga0486194_01_4945849_4947303|Ga0486194_01_3769202_3770752|Ga0486194_01_796969_798438|Ga0486194_01_1996161_1997648
Akkermansia muciniphila ATCC BAA-835	Amuc_0830|Amuc_1151	Amuc_0831|Amuc_1152	Amuc_0832|Amuc_1153																Amuc_0171
Bifidobacterium longum subsp. longum JCM 11341						BL1341_RS09030													BL1341_RS08300
Clostridium sporogenes ATCC 15579	CLOSPO_00235	CLOSPO_00236	CLOSPO_00237							CLOSPO_03849									CLOSPO_00997|CLOSPO_00574								CLOSPO_03299	CLOSPO_03298
Escherichia coli MG1655	Ga0063390_03473	Ga0063390_03472	Ga0063390_03471			Ga0063390_02082	Ga0063390_00982	Ga0063390_00983	Ga0063390_00984	Ga0063390_00088|Ga0063390_03087				Ga0063390_01671	Ga0063390_01672	Ga0063390_02812	Ga0063390_02811	Ga0063390_02465	Ga0063390_03799	Ga0063390_03085	Ga0063390_03085				Ga0063390_00187	Ga0063390_00188
Staphylococcus aureus aureus ATCC 29213	Ga0098770_11361	Ga0098770_11362	Ga0098770_11363		Ga0098770_103280		Ga0098770_104210	Ga0098770_104211|Ga0098770_104213	Ga0098770_104212	Ga0098770_10215|Ga0098770_10321|Ga0098770_104154								Ga0098770_105189	Ga0098770_11624|Ga0098770_102163	Ga0098770_104157	Ga0098770_104156						Ga0098770_10535	Ga0098770_10534
Proteus mirabilis GN2	Ga0272080_01_1963222_1964922|Ga0486194_01_331369_333075	Ga0272080_01_1961153_1963210|Ga0486194_01_329317_331350	Ga0272080_01_1960549_1961142|Ga0486194_01_328731_329300				Ga0272080_01_1089527_1090726	Ga0272080_01_1088305_1089534	Ga0272080_01_1087190_1088185	Ga0272080_01_2218399_2220441|Ga0272080_01_901395_903398				Ga0272080_01_3608567_3610429	Ga0272080_01_3610419_3610979			Ga0272080_01_105979_107481|Ga0272080_01_2370678_2372051	Ga0272080_01_2413348_2414832|Ga0272080_01_3796386_3797876	Ga0272080_01_2216087_2217562	Ga0272080_01_2216087_2217562
